# Supplementary material for: Differential spatiotemporal development of Purkinje cell populations and cerebellum-dependent sensorimotor behaviors
Source: eLife. 2021 May 11;10:e63668. doi: 10.7554/eLife.63668 (PMC8195607; doi:10.7554/eLife.63668)
Supplement: Figure 1—source data 1. [file elife-63668-fig1-data1.xlsx]

## Sheet: Sheet1
				Simple spike variables				Complex spike variables
Zebrin	Lobule	Age	Recording time (sec)	Firing freq. (Hz)	CV	Mean CV2	Reg. index	Firing freq. (Hz)	CV	Mean CV2	Reg. index	CF pause (sec)	Cell Nr.
0	Simplex	12	260.84	19.5599	0.844101	0.572782	0.0997648	0.490537	0.637494	0.672984	0.0944882	0.136781	124
0	Lobule 4/5	13	179.752	20.5338	1.90363	0.735579	0	0.881163	0.725287	0.867224	0	0.14238	119
0	Crus1	14	125.449	57.3936	2.63642	0.545419	0.16125	1.07001	0.699259	0.829963	0.0458015	0.0275789	108
0	Lobule 4/5	14	578.503	56.6064	1.5823	0.647283	0.0940239	0.888521	0.81476	0.925967	0.0373281	0.038055	110
0	Lobule 9	14	177.918	62.4952	1.82189	0.609272	0.138951	0.181061	1.1184	1.14004	0	0.0378381	112
0	Lobule 9	15	135.418	61.7495	0.239969	0.235123	0.443435	0.614882	0.77846	0.855904	0.0240964	0.0232763	101
0	Lobule 4/5	15	116.769	18.7036	5.23911	0.403461	0.364927	0.348363	0.741125	1.03273	0.05	0.417343	104
0	Lobule 4/5	15	166.573	76.7353	2.81695	0.453988	0.216476	1.10765	0.828894	0.903422	0.0546448	0.105644	105
0	Paramedian lobule	15	302.483	43.9694	3.38979	0.524979	0.182707	1.25422	0.697342	0.84915	0.0265252	0.139442	106
0	Lobule 4/5	16	189.319	89.5207	4.7331	0.298617	0.525136	0.387211	1.23781	1.08286	0.0273973	0.15043	90
0	lobule 2	16	284.142	54.2088	1.00612	0.692336	0.0612868	1.65936	0.71299	0.810415	0.0318471	0.0130432	93
0	lobule 6	16	94.712	92.4804	1.71327	0.456484	0.178673	0.544157	0.964922	1.07614	0.0425532	0.0522023	94
0	Simplex	16	427.891	51.0714	0.997938	0.504122	0.164646	1.12396	0.908489	0.963914	0.0416667	0.043699	97
0	Simplex	16	313.152	45.5593	1.53224	0.64536	0.000280367	1.07125	0.776944	0.761229	0	0.0228808	98
0	Crus 2	16	461.423	52.0021	0.400292	0.330202	0.291769	0.216973	0.847749	0.941126	0.020202	0.0258273	99
0	Lobule 6	17	173.211	85.6703	4.04537	0.455785	0.192601	1.05775	1.42631	0.837406	0.0111111	0.13118	84
0	Lobule 4/5	17	123.914	98.0759	2.03043	0.537912	0.177652	0.805981	1.13287	1.05777	0	0.115015	85
0	Crus 2	17	208.947	41.8384	0.876215	0.585615	0.0770991	0.998812	0.738668	0.85984	0.0588235	0.0323527	87
0	Lobule 4/5	17	235.175	75.4671	2.15095	0.409911	0.236646	0.532418	0.909108	0.810162	0.016129	0.153495	88
0	Anterior lobule	20	182.651	93.0189	0.61028	0.486695	0.137081	0.421823	0.680384	0.785755	0	0.020798	77
0	Crus 2	21	304.03	58.0501	2.61069	0.547145	0.197292	3.18199	0.566812	0.60237	0.0610134	0.0234488	64
0	Lobule 4/5	21	255.371	78.4426	0.592634	0.485226	0.123452	1.29343	0.639664	0.782987	0.0699088	0.0215252	67
0	Lobule 4/5	21	117.102	107.906	1.78361	0.371381	0.250633	1.24728	0.635274	0.78649	0.0413793	0.122787	68
0	Capula of the pyramis	21	197.93	54.5799	1.17586	0.666797	0.0592428	2.51705	0.850753	1.03232	0.0121457	0.0208605	69
0	Capula of the pyramis	21	223.621	69.5239	2.89733	0.500886	0.139898	1.40476	0.798718	0.836265	0.0480769	0.041117	70
0	Lobule 9	22	231.763	50.8752	0.44687	0.449254	0.139174	1.60923	0.615121	0.777236	0.0564516	0.0191203	58
0	Capula of the pyramis	23	118.05	44.7778	1.27036	0.617631	0.0934544	1.21564	0.735393	0.878631	0.028169	0.0139511	51
0	Lobule 3	23	157.602	80.6336	0.622027	0.574048	0.0852219	1.3969	0.743138	0.927748	0.0229358	0.0177443	56
0	Lobule 4/5	24	284.438	44.544	0.984145	0.654846	0.0710339	1.7395	0.731642	0.846658	0.0323887	0.0208682	47
0	Crus 2	24	106.559	60.8961	0.600053	0.327332	0.338881	1.94821	0.659734	0.771503	0.0194175	0.0183725	48
0	Lobule 7	25	137.682	77.7006	0.460965	0.388702	0.000934754	1.34079	0.773093	0.816133	0	0.0216664	149
0	Lobule 4/5	25	166.292	91.7484	0.629646	0.480744	0.000131087	1.3401	0.801852	0.804738	0	0.0142615	176
0	Lobule 1	27	114.253	75.5167	0.433409	0.406225	0.000463607	1.47978	0.715743	0.79789	0	0.0220894	185
0	Lobule 3	27	137.871	72.3501	0.664131	0.548443	0.000601504	1.08467	0.729702	0.872044	0	0.0191839	186
0	Lobule 6	29	159.994	55.052	0.454424	0.387833	0.000227066	0.901214	0.768375	0.930123	0	0.026865	134
0	Lobule 1	29	141.993	56.9396	0.673285	0.557183	0	1.05729	0.709076	0.825967	0	0.0170132	200
0	Lobule 4/5	30	142.945	88.146	0.552161	0.487233	0.00031746	1.58832	0.731139	0.832803	0	0.0150329	137
0	Lobule 1	30	148.297	80.5006	0.471928	0.477571	0	1.50092	0.707546	0.799056	0	0.0154196	189
0	Lobule 3	31	131.78	83.3508	0.386086	0.375946	0.000546249	0.932067	0.787257	0.882777	0	0.0178179	138
0	Lobule 4/5	31	101.984	81.7183	0.51244	0.49857	0	1.01241	0.690443	0.805215	0	0.0199746	195
0	Lobule 4/5	32	216.972	82.4486	0.476501	0.422184	0.000559003	1.17372	0.826939	0.859907	0	0.0177746	182
0	Lobule 4/5	32	162.906	103.219	0.573406	0.412147	0.00083259	1.45943	0.706288	0.796609	0	0.0143447	183
0	Lobule 4/5	34	220.216	71.7206	0.516971	0.521183	0.106433	1.37708	0.838351	1.02279	0.0264901	0.0213822	39
0	Lobule 6	34	208.883	82.2755	0.573329	0.5611	0.0882695	1.35807	0.798766	0.916638	0.0213523	0.0190301	40
0	Lobule 8	34	97.9882	81.1832	0.507119	0.482884	0.118165	1.30782	0.808134	0.939522	0	0.0151752	41
0	Lobule 1	34	111.796	75.7901	0.596291	0.381225	0.000472088	1.25338	0.750101	0.892778	0	0.0184787	146
0	Lobule 4/5	34	124.298	54.8924	0.588188	0.544505	0	1.44748	0.688801	0.786698	0	0.0212818	167
0	Lobule 8	35	160.666	74.7824	0.386354	0.333997	0.000665834	0.899103	0.845088	0.933986	0	0.0185208	170
0	Crus 1	36	151.48	82.7369	0.413197	0.385163	0.206654	1.52272	0.725607	0.883687	0.0434783	0.0133241	25
0	Lobule 3	36	343.53	67.2867	0.518397	0.458753	0.139996	1.54602	0.700123	0.830061	0.0414313	0.0148404	26
0	Simplex	36	135.329	122.043	0.40676	0.331438	0.271555	1.35505	0.953674	1.0149	0.0218579	0.0184411	27
0	Paramedian lobule	36	163.679	46.1757	0.713193	0.486719	0.149378	1.64504	0.636328	0.789121	0.0410448	0.0185994	28
0	Lobule 9	36	199.255	14.9808	0.761371	0.567495	0.081407	1.23352	0.611991	0.747922	0.0163934	0.0779125	31
0	Paramedian lobule	36	159.568	132.075	0.561778	0.392838	0.000711744	0.828764	0.689803	0.884754	0	0.015992	32
0	Lobule 1	37	109.38	88.7186	0.525179	0.515831	0	1.11962	0.76528	0.817004	0	0.0126661	152
0	Lobule 6	37	113.978	74.4093	5.56912	0.413356	0.000235821	1.42444	0.795294	0.913389	0	0.0152544	192
0	Lobule 4/5	38	185.321	73.7369	0.571602	0.519673	0.000731797	1.58847	0.725811	0.827563	0	0.0140489	155
0	Lobule 1	40	92.2859	48.3064	0.271107	0.280482	0.325258	1.22037	0.636521	0.761539	0.0714286	0.023652	17
0	Lobule 6	40	134.578	80.1244	0.430898	0.411006	0.000370954	0.837397	0.769793	0.891688	0	0.0172316	156
0	Lobule 4/5	41	154.427	74.2616	0.394284	0.327452	0.00104639	1.28048	0.660221	0.716179	0	0.0219762	151
0	Lobule 8	41	119.97	76.8439	0.514735	0.491937	0.000216943	1.26472	0.59857	0.697729	0	0.0162633	157
0	Lobule 1	42	110.592	78.8032	0.402327	0.412364	0.161675	1.25047	0.716605	0.984065	0	0.0159204	16
0	Lobule 6	42	102.321	71.3639	0.487	0.436913	0.00109559	1.14023	0.655756	0.81096	0	0.0276597	144
0	Lobule 1	42	133.363	85.9011	0.398031	0.382609	0.000523743	1.14193	0.706968	0.805072	0	0.0192414	145
0	Lobule 6	42	135.552	74.3997	0.625662	0.488387	0.000198314	1.03422	0.632616	0.704437	0	0.0159429	159
0	Lobule 1	42	205.322	79.8844	0.433944	0.457851	0.000487745	1.12347	0.650794	0.851083	0	0.0161795	161
0	Lobule 4/5	44	164.112	67.6915	0.50572	0.511019	0.111531	1.19327	0.775172	0.891926	0.0205128	0.0220987	13
0	Lobule 9	44	189.842	83.1535	0.444572	0.45233	0.000506778	1.31726	0.693615	0.808008	0	0.0180729	129
0	Lobule 9	44	101.387	76.7651	0.442722	0.463121	0.000513941	0.944539	0.734641	0.707899	0	0.0207805	187
0	Lobule 7	45	242.063	78.0374	0.453138	0.369276	0.000529381	1.05896	0.703214	0.812112	0.00787402	0.0238087	142
0	Lobule 3	48	98.986	76.5058	0.449731	0.444688	0	1.04907	0.749512	0.827481	0	0.017836	150
0	Lobule 4/5	48	137.703	94.9002	0.44837	0.443624	0.00107132	1.18317	0.70814	0.735067	0	0.016474	162
0	Lobule 4/5	48	126.302	89.1987	0.351999	0.354555	0.000355051	1.47692	0.763993	0.948929	0	0.013586	163
0	Lobule 4/5	48	138.437	94.3387	0.477777	0.457157	0.000306279	1.34649	0.701326	0.733896	0	0.0151757	168
0	Lobule 1	49	119.225	82.2896	0.52219	0.492729	0.109163	1.71585	0.780791	0.951114	0.0295567	0.0131949	12
0	Lobule 7	52	203.134	124.794	0.474084	0.425491	0.00086785	0.810813	0.783065	0.880719	0	0.0129995	143
0	Lobule 1	55	180.925	33.2072	0.411548	0.37169	0.195573	0.73815	0.571407	0.727802	0.0676692	0.0474274	11
0	Lobule 4/5	59	92.7035	56.945	0.331528	0.292817	0.329418	1.29582	0.7615	0.936963	0.0338983	0.029535	9
0	Lobule 1	59	106.889	80.2796	0.423953	0.451054	0.0012819	1.4118	0.805714	0.936537	0	0.0152671	166
0	Lobule 1	60	92.4369	74.797	0.426727	0.445279	0.135377	1.33511	0.6193	0.680765	0.05	0.01563	8
0	Lobule 6	60	93.0854	126.422	0.494184	0.409159	0.00110469	1.65179	0.728374	0.775491	0	0.0120075	165
0	Lobule 3	72	119.994	102.013	0.673548	0.50235	0.000163385	1.26329	0.682219	0.775108	0	0.0169197	300
0	Lobule 3	72	279.983	72.8437	0.652857	0.530373	0	1.22135	0.665719	0.795624	0	0.0244191	301
0	Lobule 2	72	122.455	100.821	0.520647	0.4893	0.000485987	1.04375	0.690751	0.861013	0	0.014338	302
0	Lobule 2	72	126.347	137.788	0.896478	0.398333	0.00143604	1.10152	0.713078	0.87666	0	0.0231887	303
0	Lobule 2	72	104.098	90.2998	0.604127	0.490582	0.000212766	0.992544	0.820825	0.782117	0	0.0197584	304
0	Lobule 3	72	149.98	95.1859	0.602378	0.503673	0.000700476	1.06921	0.707716	0.832055	0	0.0135019	305
0	Lobule 6/7	76	252.982	73.0091	0.459879	0.410395	0	0.802976	0.773397	1.01307	0	0.0144174	225
0	Lobule 9	79	412.984	82.6933	0.313354	0.335496	0.000995578	0.719103	0.69445	0.71565	0	0.0179749	235
0	Lobule 3	84	199.978	89.7249	0.606115	0.483796	0.000445856	1.25689	0.734728	0.832523	0	0.0181468	284
0	Lobule 3	84	299.956	75.8245	0.612285	0.508471	8.79353e-05	1.27598	0.822351	0.984784	0	0.0230274	285
0	Lobule 9	86	199.971	92.1431	0.45845	0.474446	0.000542711	0.397918	0.76658	0.864696	0	0.0179031	246
0	Lobule 6/7	89	189.98	99.4738	1.16297	0.293752	0.00253995	0.579351	0.727342	0.839389	0	0.0378463	249
0	Lobule 3	91	229.991	69.9636	0.772318	0.513164	0.000248586	1.02794	0.699007	0.843624	0	0.0228929	306
0	Lobule 3	91	127.517	90.9053	0.732281	0.452334	0.000690131	1.10966	0.77503	0.757643	0	0.0166654	307
0	Lobule 6/7	92	129.978	104.533	0.454532	0.377182	0.000294399	1.09403	0.800165	0.873683	0	0.0154559	320
0	Lobule 4/5	94	128.016	48.7987	0.590477	0.513586	0.114775	1.15431	0.681336	0.906389	0.0136986	0.0317904	7
0	Lobule 3	95	219.944	54.1091	0.643291	0.575031	0.000504159	1.68879	0.70874	0.775527	0	0.022311	308
0	Lobule 3	95	216.971	81.6745	0.73682	0.579141	0.000451442	1.10282	0.643112	0.816866	0	0.0176377	309
0	Lobule 4/5	96	119.934	92.5174	1.60833	0.42469	0.00117159	1.33277	0.72624	0.743392	0	0.018811	322
0	Lobule 9	104	275.325	86.5376	0.727673	0.59448	0.000167884	0.925175	0.733376	0.824329	0	0.0203065	238
0	Lobule 9	106	339.99	97.2027	0.537423	0.424452	0.000907771	1.49643	0.700406	0.795833	0	0.022596	226
0	Paramedian lobule	107	614.979	76.3831	0.452311	0.375357	0.000702516	1.23472	0.79135	0.912744	0	0.0211771	272
0	Lobule 6/7	107	124.36	73.0218	0.466178	0.413788	0.0011012	0.845078	0.66345	0.781432	0	0.0246799	274
0	Paramedian lobule	112	199.993	82.7877	0.439702	0.303865	0.00169113	1.45408	0.630064	0.77212	0	0.0225612	201
0	Lobule 2	113	400.261	38.8547	0.698342	0.583175	0.000128601	1.14152	0.814541	0.838404	0	0.0265564	287
0	Lobule 2	113	259.995	67.6051	0.404025	0.424971	0.00068271	2.00895	0.772569	0.848725	0	0.0241759	288
0	Lobule 2	113	101.557	70.8567	0.632308	0.551061	0	0.850371	0.648041	0.788578	0	0.0233902	289
0	Lobule 3	113	149.982	76.7094	0.779866	0.496866	0.000869187	1.0947	0.747384	0.832512	0	0.0152408	290
0	Lobule 2	113	105.426	97.9643	0.72069	0.530194	0.000387297	1.64547	0.757962	0.86832	0	0.0241673	291
0	Lobule 2	113	125.996	83.5501	0.491185	0.520969	0	1.24946	0.782235	0.815278	0	0.0175053	315
0	Lobule 2	124	215.19	80.6266	0.519465	0.509897	0.000461095	0.842637	0.705701	0.913639	0	0.0177979	292
0	Lobule 1	124	371.765	93.1503	1.13248	0.550826	0.000462027	1.39283	0.725303	0.8175	0	0.0175544	293
0	Lobule 2	124	239.648	106.661	0.628052	0.497152	0.000665076	1.51379	0.676524	0.838731	0	0.0173028	295
0	Lobule 6/7	127	255.017	95.6367	0.688266	0.502063	0.000492025	1.26737	0.841132	0.843969	0	0.0317758	205
0	Lobule 9	127	152.94	100.968	0.884718	0.557023	0.000388551	1.12637	0.837572	0.853512	0	0.0151468	261
0	Lobule 4/5	141	157.356	76.5526	0.71839	0.416604	0.00182633	1.23299	0.758136	0.91671	0	0.0158173	2
0	Paramedian lobule	141	222.479	49.0384	0.676476	0.564312	0.091659	1.42361	0.716981	0.865897	0.0700637	0.0202892	3
0	Lobule 3	142	212.477	107.696	0.39293	0.332538	0.00122362	1.16886	0.714419	0.826163	0	0.016588	262
0	Lobule 2	142	324.253	95.481	0.518447	0.465573	0.000452196	0.904247	0.744677	0.860464	0	0.0123393	263
0	Lobule 2	142	132.658	91.5587	0.559746	0.459996	0	1.27161	0.706146	0.792838	0	0.0180081	264
0	Lobule 1	163	189.994	108.598	0.691204	0.532426	0.000193864	1.77876	0.802101	0.859909	0	0.0171393	298
0	Lobule 1	163	219.976	111.744	0.661171	0.498938	0.000325455	1.32122	0.701243	0.780741	0	0.0160894	299
0	Lobule 2	170	121.96	61.2249	0.430562	0.400167	0.00053569	1.53677	0.739526	0.89709	0	0.0214315	319
0	Simplex	183	119.992	106.507	0.425382	0.396874	0.000625978	1.14362	0.705487	0.778881	0	0.0102907	267
0	Crus 1/2	183	146.406	119.162	0.609911	0.366067	0.000745156	1.27393	0.822804	0.959649	0	0.0274906	268
0	Crus 1/2	184	119.965	94.4106	0.922363	0.40028	0.00141268	1.34413	0.743466	0.888908	0	0.0206002	269
0	Lobule 3	198	119.98	45.5077	1.30582	0.70687	0	1.36133	0.709405	0.877986	0	0.0559758	282
0	Lobule 3	202	131.439	71.1735	0.711783	0.569858	0.000213789	1.25572	0.702503	0.800849	0	0.0173382	283
0	Paramedian lobule	203	325.996	104.612	0.425156	0.330109	0.00184734	0.968256	0.852249	0.993677	0	0.0143866	270
0	Lobule 3	212	119.992	104.607	0.661356	0.477832	0.00119503	1.35909	0.760733	0.908368	0	0.0134341	206
0	Lobule 3	212	236.161	108.917	1.3235	0.501883	0.00108856	1.55514	0.625994	0.77115	0	0.0210487	207
0	Lobule 3	212	157.974	98.3073	0.629713	0.488027	0.000257566	1.33636	0.750724	0.854972	0	0.020049	208
0	Lobule 4/5	212	207.159	99.6869	0.767009	0.518652	0.000871628	0.940537	0.725311	0.803963	0	0.0160442	209
0	Lobule 4/5	219	431.379	76.719	0.424316	0.414994	0.000906481	1.80684	0.653239	0.770535	0	0.0183256	210
0	Lobule 6/7	219	219.688	96.6188	0.846002	0.471673	0.000942241	1.15466	0.722117	0.867261	0	0.0161939	211
0	Lobule 4/5	219	242.762	103.48	1.1774	0.457221	0.000955376	1.34481	0.729589	0.891085	0	0.0146852	212
0	Lobule 3	219	159.986	95.4461	0.645528	0.485556	0.000654879	1.15006	0.688142	0.755923	0	0.0150156	213
0	Lobule 4/5	219	119.991	64.9801	0.721203	0.578715	0.000513018	0.892028	0.814207	0.85449	0	0.0216289	214
0	Lobule 4/5	219	299.955	92.3172	0.380884	0.35726	0.000433354	1.06182	0.764709	0.791927	0	0.019001	215
0	Lobule 3	219	134.981	90.5534	0.942044	0.449507	0.000327252	1.11506	0.732999	0.803696	0	0.0200454	216
0	Lobule 3	219	154.568	83.3677	0.726894	0.500188	0.000776036	1.12253	0.689328	0.833711	0	0.0163548	217
0	Lobule 3	219	179.981	80.1753	0.76789	0.561402	0.0001386	1.21979	0.771989	0.810953	0	0.0224165	218
0	Lobule 4/5	233	119.988	69.5821	0.682581	0.638351	0	1.38128	0.668581	0.727796	0	0.037966	224
0	Simplex	236	112.713	99.8019	0.717861	0.453198	0.000177794	0.834631	0.719987	0.892769	0	0.0188994	219
0	Lobule 3	237	398.854	124.794	0.728936	0.445427	0.000492197	1.45901	0.779252	0.831797	0	0.016278	220
0	Lobule 2	237	219.971	118.484	0.691184	0.407834	0.00149637	1.4349	0.658907	0.814927	0	0.0197295	221
0	Lobule 2	237	191.628	115.182	0.709096	0.413905	0.000634288	0.698864	0.818829	0.938975	0	0.0152042	222
0	Lobule 3	237	187.983	95.466	0.682116	0.443383	0.000668673	1.06912	0.671414	0.84338	0	0.0166346	223
1	Lobule 10	12	266.425	11.4291	2.057	0.558166	0.177997	0.425082	0.629728	0.718689	0.079646	0.206279	121
1	Lobule 10	12	255.022	22.4844	0.269626	0.25198	0.3842	0.399162	0.675975	0.801304	0.06	0.0483899	122
1	Lobule 10	13	159.031	42.4508	2.50202	0.603177	0.13198	0.578258	1.0809	0.953357	0.0659341	0.150193	118
1	Paramedian Lobule	13	180.416	13.1641	0.72792	0.574111	0.096	0.575675	0.616349	0.668202	0.0784314	0.138378	115
1	Lobule 10	13	181.263	20.1476	0.549331	0.422641	0.180997	1.01201	0.530698	0.572821	0.0718232	0.0585425	116
1	Lobule 10	13	112.28	24.5635	0.742074	0.520862	0.132342	0.459118	0.709923	0.658656	0.1	0.0565336	117
1	Capula of the pyramis	13	140.966	16.692	1.38859	0.421195	0.457289	0.95359	0.690959	0.810832	0.0451128	0.270825	120
1	Flocculus	14	264.255	12.6961	0.43845	0.279484	0.420864	0.829654	0.797977	0.948834	0.00917431	0.108636	107
1	Crus1	14	280.082	5.46269	1.37288	1.37708	0.00784314	0.17583	1.67667	1.05145	0.0408163	0.19016	109
1	Crus 1	14	127.782	74.8618	3.44035	0.427893	0.249321	1.49115	1.28631	0.993802	0.0210526	0.0774838	111
1	Lobule 10	14	274.307	20.8051	0.643719	0.555652	0.0947959	0.70665	0.754087	0.961667	0.0416667	0.0630353	113
1	Paraflocculus	14	256.037	5.39767	8.35068	0.803492	0.13097	0.632665	0.702263	0.78609	0.025	0.908515	114
1	Lobule 10	14	155.777	32.585	1.79655	0.320343	0.309299	0.505042	0.726419	0.962008	0.025641	0.046695	123
1	Crus 1	15	142.944	65.718	1.48722	0.421977	0.200447	1.452	0.805022	0.902514	0.0338164	0.0656393	102
1	Anterior lobule	15	300.166	41.3105	0.759113	0.470527	0.169435	1.26743	0.792485	0.818068	0.0585106	0.0323611	103
1	Lobule 6	16	218.958	25.4113	2.29055	0.396795	0.323688	0.901766	0.613556	0.7928	0	0.114683	89
1	Crus 1	16	138.162	56.8606	2.43667	0.530738	0.40084	2.3468	0.658645	0.766503	0.0650155	0.0177568	91
1	Paramedian lobule	16	193.588	67.3079	2.89077	0.470718	0.279125	1.61763	0.780225	0.853795	0.022508	0.0676556	92
1	paraflocculus	16	296.305	61.4233	4.44086	0.483032	0.186319	1.50602	0.770608	0.901768	0.0269663	0.0383911	95
1	Copula of the pyramis	16	124.445	84.5753	3.03804	0.345138	0.606841	1.19889	0.746174	0.742102	0.056338	0.0204543	96
1	Paramedian lobule	16	278.086	69.6836	2.05716	0.553503	0.106306	1.19533	0.830631	0.927404	0.0241692	0.0892955	100
1	Paramedian lobule	17	382.085	46.9503	2.46265	0.587872	0.201795	1.3426	0.810505	0.930384	0.00976562	0.0417995	81
1	Crus 2	17	147.816	64.4246	2.26862	0.578724	0.12097	1.20703	0.757903	1.02782	0	0.0431873	82
1	Capula of the pyramis	17	186.539	83.7303	2.15017	0.501088	0.179653	1.88887	0.660078	0.798467	0.0227273	0.0199459	83
1	Simplex	17	99.4803	88.1179	2.2211	0.501778	0.138033	1.43477	0.806291	0.896949	0.028169	0.014802	86
1	Lobule 1	18	98.9891	33.7209	2.78782	0.456234	0.204614	0.620035	0.798779	0.929452	0.0344828	0.103536	80
1	Lobule 10	19	281.894	36.3045	0.733838	0.563588	0.0856947	0.651051	0.43285	0.543128	0.0934066	0.064904	78
1	Crus 2	19	264.115	60.7653	0.905263	0.455218	0.176522	1.62461	0.778053	0.871453	0.0397196	0.0193995	79
1	Paramedian lobule	20	287.026	31.7915	1.0769	0.616397	0.0736438	0.499853	0.613189	0.887745	0.013986	0.0954468	75
1	Lobule 9	20	118.082	47.5433	0.359954	0.367851	0.201104	0.460817	0.631115	0.812817	0	0.0447573	76
1	Paraflocculus	21	219.082	27.8846	2.41307	0.523908	0.173187	2.61034	0.649732	0.808118	0.0596491	0.149206	63
1	Flocculus	21	180.096	84.7825	2.391	0.448711	0.174209	1.81909	0.985566	1.08931	0.0191083	0.0522711	65
1	Lobule 3	21	260.008	26.0492	0.600045	0.559619	0.0947881	0.36413	0.782377	1.00729	0.107692	0.0819931	65
1	Flocculus	21	228.331	71.9789	0.286397	0.282824	0.307089	0.374202	0.554606	0.643737	0.107143	0.0236956	71
1	Lobule 9	21	223.79	43.2995	1.98709	0.762508	0.0517028	1.24532	0.62952	0.740669	0.028777	0.100257	72
1	Lobule 9	21	248.784	50.4495	0.39045	0.401285	0.167716	1.60126	0.618684	0.746026	0.040201	0.0233792	73
1	Lobule 9	21	109.879	57.2357	0.743228	0.454573	0.000954047	1.00277	0.651941	0.839012	0	0.0488825	74
1	Lobule 9	22	302.2	68.3488	0.47048	0.472051	0.131203	1.34123	0.766386	0.833548	0.0419753	0.0200184	59
1	Lobule 9	22	94.0769	73.9395	0.37815	0.431723	0.155118	1.13985	0.617967	0.781589	0.0377358	0.0184565	60
1	Flocculus	22	124.308	37.3428	0.53649	0.431892	0.152736	0.544891	0.655068	0.75489	0.0298507	0.0605428	61
1	Crus 2	22	122.757	45.4718	4.08903	0.565519	0.156575	1.58438	0.74314	0.929173	0.0362694	0.0416909	62
1	Lobule 10	22	219.958	75.1736	0.320348	0.34465	0.000846689	0.93061	0.727354	0.85998	0	0.0221351	172
1	Lobule 9	22	104.766	66.2335	0.316605	0.341364	0.00158524	1.18673	0.753734	0.846726	0	0.0215324	173
1	Paraflocculus	23	309.356	39.0715	1.82163	0.514477	0.160834	1.537	0.511825	0.635462	0.0991561	0.0974325	52
1	Lobule 10	23	325.465	53.0778	0.345352	0.307111	0.286078	0.890691	0.702365	0.792168	0.0139373	0.0378945	53
1	Paraflocculus	23	172.866	40.3377	2.06621	0.610712	0.127205	1.373	0.590722	0.748597	0.093617	0.0540909	54
1	Paramedian lobule	23	124.48	56.3946	0.617147	0.494342	0.133476	1.37445	0.77398	0.893393	0.0175439	0.0174362	55
1	Lobule 10	24	147.701	39.7696	0.338542	0.317378	0.265918	0.780871	0.657964	0.762053	0.0695652	0.039063	49
1	Paramedian lobule	24	98.8578	109.511	4.08654	0.343826	0.00415666	1.36405	0.794487	0.95128	0	0.0151351	50
1	Lobule 10	25	134.971	34.6444	0.439295	0.380957	0.199957	1.22395	0.742814	0.68581	0.0365854	0.045959	46
1	Lobule 8	25	131.685	67.4035	0.362809	0.359094	0.00067598	1.35403	0.762383	0.862012	0	0.0220688	175
1	Lobule 10	25	194.034	64.2258	0.372717	0.391278	0.000802439	1.69778	0.734587	0.859079	0	0.0222272	177
1	Lobule 9	25	125.859	70.2611	0.768237	0.452928	0	1.12103	0.761988	0.741038	0	0.0208641	178
1	Lobule 9	26	94.4282	58.203	0.246285	0.261124	0.36754	0.897601	0.59988	0.691999	0.180723	0.0210337	45
1	Lobule 9	28	179.135	77.9303	0.263356	0.266318	0.00114613	0.955081	0.712128	0.815635	0	0.0198276	130
1	Lobule 9	28	182.579	71.1146	0.331153	0.321952	0.00107825	1.18213	0.892746	0.942947	0	0.0198644	179
1	Lobule 10	28	197.831	59.6317	0.372749	0.337634	0.00118674	1.1955	0.8151	0.812419	0	0.0259956	180
1	Lobule 9	29	239.974	58.7064	0.297004	0.300637	0.00184554	1.09038	0.768491	0.937878	0	0.0246866	140
1	Lobule 10	29	117.431	60.8356	0.285296	0.279264	0.00195969	1.63375	0.739185	0.801902	0	0.0289005	199
1	Lobule 10	30	116.564	23.8323	0.405289	0.339036	0.223902	1.13599	0.515119	0.652315	0.0681818	0.0579751	44
1	Lobule 10	30	178.949	75.3008	0.665915	0.56228	0.000445269	0.954004	0.961687	0.855401	0	0.0231172	190
1	Lobule 9	30	154.553	60.4972	0.363201	0.350529	0.000213904	1.19619	0.845792	0.847326	0	0.028126	194
1	Lobule 9	31	160.107	54.27	0.280738	0.289273	0.00138106	1.14827	0.554162	0.781659	0	0.0265361	139
1	Lobule 10	31	183.26	67.9419	0.388577	0.346207	0.00144567	1.28788	0.721168	0.858469	0	0.0222473	196
1	Paraflocculus	31	123.418	77.8411	0.412248	0.376871	0.000416363	1.12978	0.72192	0.856677	0	0.0169403	197
1	Lobule 8	31	249.985	63.6478	0.430204	0.407238	0.000251398	1.38165	0.90707	0.960628	0	0.0221886	198
1	Flocculus	33	840.587	29.2653	0.473329	0.346965	0.242358	0.836598	0.573056	0.701735	0.0555556	0.0717443	43
1	Capula of the pyramis	33	95.3879	64.9349	0.391383	0.330733	0.00226025	1.27006	0.923889	0.949866	0	0.0238827	131
1	Lobule 9	33	199.955	47.5507	0.307776	0.285369	0.000631048	0.523651	0.798748	0.967703	0	0.0348196	132
1	Lobule 10	33	182.063	45.0284	0.341881	0.301111	0.000487924	0.706555	0.645506	0.77608	0	0.043665	184
1	Lobule 10	34	114.921	45.3618	0.286844	0.262099	0.391329	0.927109	0.735383	0.736911	0.0377358	0.0378558	42
1	Lobule 10	35	100.033	57.5309	0.250919	0.287445	0.316247	0.654085	0.68733	0.836157	0	0.0225434	34
1	Lobule 10	35	157.059	29.3838	0.293157	0.226426	0.469122	0.525735	0.888731	1.08275	0.0365854	0.0678153	35
1	Lobule 9	35	127.333	46.5473	0.356498	0.35684	0.226928	0.869034	0.673859	0.745326	0.0363636	0.0362139	36
1	Lobule 9	35	174.243	66.4072	0.256828	0.251538	0.396941	0.944868	0.784753	0.942991	0.0304878	0.0237284	37
1	Lobule 10	35	201.871	32.6793	0.348431	0.29269	0.320752	1.03781	0.553932	0.677566	0.105263	0.0454639	38
1	Lobule 10	35	212.253	69.356	0.407751	0.363392	0.000543441	0.610982	0.783526	0.883309	0	0.0209107	148
1	Lobule 8	35	117.848	65.1601	0.543743	0.49879	0.000520901	1.51551	0.675372	0.843166	0	0.0192835	169
1	Lobule 10	35	95.0065	58.4486	0.219059	0.234632	0.0010805	0.91376	0.679885	0.864517	0	0.0244313	171
1	Lobule 9	36	128.252	77.4099	0.489085	0.405234	0.175967	1.30614	0.77475	0.938177	0.0481928	0.016482	24
1	Flocculus	36	208.934	41.6255	0.438608	0.371654	0.199839	0.884461	0.581864	0.713288	0.0815217	0.0468264	29
1	Lobule 10	36	254.985	41.3907	0.329004	0.320985	0.278094	1.08866	0.655405	0.775724	0.0541516	0.0334942	30
1	Crus 2	36	289.116	67.0353	0.786378	0.448262	0.00113513	1.44653	0.644676	0.784607	0	0.0183991	33
1	Lobule 10	36	220.983	68.7111	0.325636	0.309043	0.00144889	0.993823	0.630018	0.742937	0	0.020345	154
1	Lobule 10	37	109.804	61.7007	0.275215	0.279134	0.332251	0.79327	0.817212	0.876081	0	0.0265379	18
1	Lobule 10	37	204.101	45.2177	4.77085	0.209935	0.508181	1.10306	0.924055	0.763079	0.0179372	0.0272004	19
1	Lobule 10	37	182.1	57.9571	0.231621	0.205112	0.506538	0.627835	0.599812	0.715213	0.0350877	0.0305698	20
1	Crus 2	37	103.34	59.0673	0.437961	0.386189	0.000327654	1.39619	0.729484	0.858358	0	0.0149782	21
1	Paramedian lobule	37	337.75	50.6794	0.351947	0.362425	0.000934743	0.981638	0.863262	1.02294	0	0.0186321	22
1	Paraflocculus	37	143.697	33.1043	0.495441	0.381866	0.000420433	1.45246	0.763517	0.850991	0	0.0500827	23
1	Lobule 10	37	154.995	49.2015	0.351582	0.307032	0.00118017	0.799663	0.578866	0.681987	0	0.0325212	135
1	Lobule 8	37	138.995	57.6712	0.501211	0.413121	0.000748503	1.36508	0.812713	0.841931	0	0.0212429	136
1	Lobule 10	37	210.956	81.7186	0.28593	0.254358	0.00174024	1.11857	0.655423	0.772053	0	0.0194893	191
1	Lobule 6	37	173.223	60.067	0.501212	0.480143	0.000576646	1.59519	0.766249	0.84572	0	0.021482	193
1	Lobule 10	41	109.673	69.9168	0.363104	0.323362	0.000521648	1.06825	0.668852	0.841652	0	0.0233234	158
1	Lobule 9	42	102.954	44.6899	1.92251	0.459026	0.143447	0.862124	0.676206	0.735241	0.0568182	0.0277333	15
1	Lobule 10	42	123.776	78.9006	0.441852	0.440152	0.00102396	1.38545	0.771676	0.904768	0	0.0154901	147
1	Lobule 9	42	135.752	54.3785	0.337216	0.267887	0.00135465	0.891239	0.592149	0.679819	0	0.0229	160
1	Lobule 8	43	133.509	60.8347	0.450188	0.380542	0.201182	1.20214	0.718889	0.861574	0	0.026663	14
1	Lobule 9	43	147.57	71.3426	0.267492	0.309182	0.00132979	0.899178	0.652442	0.823855	0	0.0188414	174
1	Capula of the pyramis	44	180.979	64.5988	0.346327	0.293888	0.00136857	1.47013	0.775092	0.876623	0	0.0237555	188
1	Lobule 8	45	109.986	66.5085	0.325754	0.287112	0.00177717	1.12382	0.671794	0.843501	0	0.0223987	141
1	Lobule 9	54	132.938	68.1445	0.581582	0.472577	0.000220775	1.14813	0.684657	0.843081	0	0.0168972	127
1	Lobule 10	54	241.026	52.1354	0.235963	0.217748	0.00222823	1.36098	0.813206	0.827874	0	0.0270132	128
1	Lobule 9	58	94.6966	28.1848	0.427061	0.376429	0.215062	0.823062	0.616182	0.698686	0.0789474	0.0455984	10
1	Lobule 9	58	167.588	73.7703	0.414602	0.40601	0.000647092	1.32385	0.66027	0.774665	0	0.0216669	164
1	Lobule 10	77	311.448	53.1613	0.411804	0.332114	0.00126835	0.746626	0.67945	0.794443	0	0.0352179	233
1	Lobule 9	78	206.259	57.5974	0.641375	0.508898	0.0003367	0.970077	0.628238	0.817031	0	0.0348542	241
1	Lobule 9	78	455.987	79.3685	0.299374	0.318612	0.00121577	1.63671	0.688439	0.782348	0	0.0210789	242
1	Lobule 10	78	590.92	55.8349	0.318216	0.334895	0.00100018	0.897732	0.759764	0.887666	0	0.02342	243
1	Lobule 10	79	119.981	85.5554	0.511267	0.430661	0.000974184	0.93093	0.658452	0.788026	0	0.0269159	234
1	Lobule 10	79	640.022	60.0073	0.480962	0.423922	0.000468677	0.83021	0.631251	0.809719	0	0.0291522	236
1	Lobule 9	83	119.988	56.4557	0.303458	0.309232	0.00132861	1.06626	0.605893	0.73243	0	0.0295099	244
1	Lobule 10	83	228.969	59.602	0.255988	0.267627	0.00117242	1.01306	0.559721	0.733157	0	0.029741	245
1	Lobule 9	86	375.992	72.1425	0.354487	0.374805	0.000774194	1.24193	0.684106	0.792491	0	0.0212272	247
1	Lobule 10	86	119.975	36.7161	0.5729	0.482014	0.00136209	0.723033	0.645486	0.762062	0	0.0570898	248
1	Lobule 10	89	119.993	76.4213	0.463054	0.414261	0	0.993648	0.725711	0.821499	0	0.0322495	250
1	Lobule 10	90	540.024	74.7689	0.308977	0.325598	0.000643931	1.48758	0.717296	0.83241	0	0.0154591	286
1	Lobule 9	95	113.907	73.3143	0.411965	0.38774	0.00119746	1.07399	0.656581	0.819824	0	0.0200832	6
1	Lobule 10	95	139.945	20.0865	0.642867	0.406718	0.00213447	0.71676	0.701234	0.881385	0	0.081025	310
1	Lobule 4/5	96	149.958	29.9017	1.35745	0.711557	0	1.31121	0.675603	0.766557	0	0.0697038	321
1	Lobule 9	104	176.917	47.542	0.433093	0.458579	0.000475568	0.629959	0.472868	0.605588	0	0.0275198	237
1	Lobule 10	104	309.994	76.1466	0.311352	0.343904	0.000508367	1.35856	0.745892	0.861675	0	0.0194861	273
1	Lobule 10	106	282.961	46.2997	0.263502	0.283011	0.00206091	0.949789	0.753897	0.833778	0	0.0242396	275
1	Paraflocculus	106	92.9203	53.4974	0.940207	0.411247	0.002414	1.15801	0.769866	0.823893	0	0.0832652	312
1	Lobule 9	107	170.194	70.5313	0.449379	0.339958	0.00116628	0.78385	0.618764	0.707463	0	0.0277242	251
1	Lobule 9	107	147.06	74.8539	0.368914	0.408904	0	0.904691	0.693548	0.823363	0	0.0210578	252
1	Crus 1/2	107	129.977	44.3311	0.555133	0.412265	0.000694203	1.25574	0.718404	0.806916	0	0.0477057	318
1	Lobule 10	110	155.978	59.8545	0.295946	0.3008	0.00203513	1.2601	0.767495	0.886672	0	0.0193789	311
1	Paraflocculus	112	371.994	54.2858	0.592212	0.562099	0.000396157	1.23083	0.850538	0.907417	0	0.0264787	202
1	Lobule 9	112	103.229	63.5189	0.411764	0.426036	0.000305018	0.995766	0.736666	0.824491	0	0.0248418	227
1	Lobule 9	112	1102.28	54.7722	0.415185	0.4522	0.000265015	0.866715	0.692671	0.843093	0	0.0259803	228
1	Lobule 9	112	100.562	57.3877	0.440111	0.352094	0.00034656	0.820065	0.733903	0.867806	0	0.027533	229
1	Lobule 9	112	102.895	36.0949	0.498166	0.445389	0.000538503	0.650493	0.66064	0.760091	0	0.0589712	230
1	Paramedian lobule	113	119.986	52.6647	0.419261	0.352617	0.00158253	1.00863	0.698258	0.79745	0	0.0330209	203
1	Lobule 9	113	189.979	60.7542	0.38166	0.396875	0.000519841	1.2196	0.590953	0.722814	0	0.0326955	253
1	Lobule 9	113	284.987	69.582	0.439781	0.475957	0.000201715	0.737548	0.586711	0.716249	0	0.0248664	254
1	Lobule 9	113	195.864	71.3658	0.481225	0.483724	0.000572328	0.826677	0.763424	0.903623	0	0.0202789	255
1	Lobule 10	113	147.993	77.6657	0.344303	0.372435	0.00147903	0.584549	0.681881	0.801054	0	0.0234	313
1	Lobule 10	113	139.964	70.2396	0.251987	0.271417	0.0016275	0.987581	0.743806	0.934669	0	0.0190294	314
1	Lobule 9	114	434.976	85.0598	0.436094	0.44593	0.000594611	1.09731	0.572962	0.67017	0	0.0183513	231
1	Lobule 10	114	459.984	54.628	0.267104	0.264407	0.00230818	1.18102	0.730355	0.842753	0	0.030432	232
1	Paramedian lobule	118	299.979	64.5079	1.0723	0.431178	0.000826831	1.1421	0.792719	0.889249	0	0.0379249	204
1	Lobule 10	118	119.984	64.5837	0.509633	0.422652	0.000774293	0.762598	0.597388	0.738967	0	0.0353785	256
1	Lobule 10	121	329.965	17.5412	0.994545	0.494344	0.000691085	0.907713	0.634195	0.835107	0	0.123828	257
1	Lobule 10	122	119.962	57.7516	0.278668	0.256986	0.00245381	1.14915	0.74957	0.858789	0	0.0278435	276
1	Lobule 10	124	359.869	45.2276	0.60964	0.449961	0.000614402	1.42009	0.733776	0.836153	0	0.0397293	294
1	Lobule 9	125	242.36	79.254	0.359019	0.372049	0.0013536	0.983657	0.624409	0.797067	0	0.0217381	258
1	Lobule 9	125	564.255	79.2815	0.325311	0.372132	0.000625908	1.10967	0.695006	0.836229	0.00746269	0.0165264	259
1	Lobule 9	127	188.653	76.7972	0.379662	0.42247	0.000483158	1.05886	0.642334	0.789617	0	0.0219498	260
1	Paraflocculus	140	173.466	67.6906	0.454589	0.380259	0.193068	0.792639	0.682361	0.819652	0.0145985	0.0290713	5
1	Lobule 4/5	141	329.099	29.7844	0.43535	0.345581	0.225056	0.755024	0.530623	0.624453	0.0406504	0.0495415	1
1	Paramedian lobule	141	103.637	38.9918	0.45699	0.392663	0.000494927	0.756261	0.634159	0.729838	0	0.0375363	4
1	Lobule 10	147	371.899	44.8159	0.344884	0.347958	0.00101998	0.708427	0.652142	0.760901	0	0.0470081	278
1	Flocculus	152	171.601	113.921	0.44647	0.455125	0.000409228	0.962245	0.745727	0.811029	0	0.0164704	265
1	Paraflocculus	152	100.773	86.2039	0.59066	0.346429	0.00138137	1.51453	0.717447	0.822837	0	0.0340912	266
1	Lobule 10	156	239.972	52.702	0.40215	0.368869	0.000790701	0.531861	0.794381	0.814801	0	0.041632	278
1	Lobule 10	156	462.984	46.9563	0.360057	0.329954	0.000827967	0.441616	0.662553	0.819469	0	0.0395758	279
1	Lobule 10	157	599.948	60.1552	3.43507	0.380756	0.000609587	0.655734	0.584337	0.747092	0	0.0590134	280
1	Lobule 10	159	299.986	73.7768	0.467826	0.469241	0.000451834	0.910361	0.708135	0.849239	0	0.0302278	296
1	Lobule 10	159	99.3236	31.3923	0.46003	0.399267	0	0.502647	0.638112	0.707982	0	0.0412024	297
1	Lobule 10	161	214.986	102.146	0.765481	0.528531	0.000364299	1.39802	0.744997	0.8348	0	0.026677	239
1	Lobule 9	161	299.986	75.7803	0.366977	0.355135	0.000527867	1.32075	0.676761	0.832072	0	0.0230879	240
1	Lobule 6/7	168	119.98	72.8954	0.541895	0.406196	0.000914704	0.483654	0.874224	1.05243	0	0.0344701	316
1	Lobule 6/7	168	122.981	38.9654	0.921387	0.596791	0	0.845524	0.743935	0.832211	0	0.0610474	317
1	Paramedian lobule	177	239.993	78.3231	0.539856	0.397009	0.001064	1.64868	0.747307	0.851103	0	0.0289797	271
1	Lobule 10	198	181.996	57.4683	0.668202	0.545097	0	0.814369	0.642805	0.776536	0	0.0355571	281
1	Lobule 10	269	130.079	81.5733	0.387003	0.466734	0	1.5261	0.591277	0.766216	0	0.0177064	277
