# Supplementary material for: Differential spatiotemporal development of Purkinje cell populations and cerebellum-dependent sensorimotor behaviors
Source: eLife. 2021 May 11;10:e63668. doi: 10.7554/eLife.63668 (PMC8195607; doi:10.7554/eLife.63668)
Supplement: Figure 2—source data 1. [file elife-63668-fig2-data1.xlsx]

## Sheet: Blad1
Lobule	Age	Recording time (sec)	Firing freq. (Hz)	CV	Mean CV2	Reg. index	Cell Nr.
3	3	149.402	3.07894	0.112421	0.0940222	0.00869565	858
3	3	149.884	5.50427	0.574678	0.850321	0	946
3	3	149.947	10.9905	0.253965	0.249265	0.00121359	948
3	3	149.846	7.7613	0.221823	0.127365	0	951
3	4	139.767	6.75409	0.0769876	0.0680366	0.0158898	636
3	4	99.8553	4.34629	0.34798	0.25082	0.00460829	629
3	4	149.071	5.67514	0.318094	0.152433	0.00236407	630
3	4	149.821	4.28512	0.125243	0.132395	0.00311526	631
3	4	149.707	8.06908	0.116901	0.13838	0.00496689	633
3	4	149.912	7.06414	0.086677	0.0749774	0.0160529	634
3	4	99.8181	7.04281	0.0955739	0.0845681	0.0056899	635
3	4	149.894	9.27323	0.185877	0.209435	0	638
3	4	145.17	11.6967	0.234482	0.0998671	0.0123675	639
3	4	149.781	8.51245	0.0600169	0.0530757	0.0352941	641
3	4	149.829	6.6209	0.459942	0.656406	0	771
3	4	149.721	3.98741	0.158447	0.113548	0.00670017	772
3	4	149.798	5.27376	0.332029	0.261509	0.00632911	773
3	4	149.517	5.47763	0.261626	0.144672	0.004884	775
3	4	149.755	3.43896	0.230733	0.219386	0	783
3	4	149.524	2.93598	0.221528	0.23427	0.00455581	784
3	4	149.517	4.10655	0.407701	0.339314	0	785
3	4	149.506	3.53833	0.305324	0.28326	0	786
3	4	149.286	3.15502	0.392977	0.323149	0.00424628	787
3	6	96.8296	8.17932	0.0599464	0.0385607	0.0530303	866
3	7	149.97	19.3706	0.17653	0.241673	0.000688468	521
3	7	149.952	20.8866	0.0813837	0.091302	0.00893997	522
3	7	149.937	17.7607	0.047321	0.0518641	0.0270372	522
3	8	149.951	17.8591	0.0936998	0.0304232	0.0739358	537
3	8	149.864	10.9366	0.160312	0.165823	0.00122026	538
3	8	149.98	18.7025	0.0657888	0.0504206	0.0253119	539
3	8	149.307	15.4849	0.11571	0.0667442	0.0203287	540
3	8	149.899	12.9887	0.0756739	0.0365733	0.067283	541
3	8	145.226	10.9209	5.41969	0.265454	0.00126103	542
3	8	144.239	4.89465	3.60822	0.196379	0.0169972	544
3	8	94.976	8.2126	0.404928	0.246559	0.00384615	545
3	8	113.767	13.6594	0.10762	0.0444328	0.039897	546
3	8	149.801	9.65283	0.128489	0.0566006	0.0304288	547
3	8	149.915	7.32413	0.0916858	0.0502596	0.0309654	548
3	8	149.955	18.7389	0.0479825	0.0408857	0.0512456	873
3	9	149.941	17.3068	0.0793339	0.0665378	0.0238921	559
3	9	149.711	2.15749	0.914014	0.349106	0	560
3	9	149.931	18.0683	0.0575349	0.0547716	0.0284238	561
3	9	149.902	16.264	0.0881307	0.0964939	0.0123052	562
3	9	149.927	15.7877	0.121003	0.0891247	0.00844951	563
3	9	149.965	22.1184	0.0584181	0.0518337	0.0370817	564
3	9	149.94	20.1147	0.0336875	0.0300918	0.0885279	565
3	9	149.889	17.126	0.125908	0.0505911	0.032723	566
3	9	149.786	27.0786	0.364247	0.36235	0	567
3	9	149.982	37.2445	0.0777718	0.0697628	0.018439	568
3	9	149.418	2.38927	0.169555	0.184032	0.00560224	583
3	9	149.917	9.27849	0.0689899	0.0385157	0.0711718	584
3	9	149.891	15.9716	0.041352	0.0309489	0.0831245	585
3	9	149.942	10.6974	0.0604552	0.0361115	0.0860349	586
3	10	149.942	21.1682	0.082774	0.03936	0.0538752	1205
3	10	149.972	38.6871	0.0952153	0.049115	0.0367115	1206
3	10	149.962	25.1797	0.0840072	0.0378082	0.0513771	1207
3	10	149.989	44.8432	0.124249	0.0330995	0.074041	1208
3	10	149.936	28.0386	0.120337	0.0313485	0.0925309	1209
3	10	149.986	44.7442	0.135626	0.0439797	0.0403815	1210
3	10	149.955	41.7725	0.0870065	0.0687202	0.0175607	1211
3	10	149.981	26.5634	0.119418	0.0564526	0.0256024	1212
3	10	149.958	30.0885	0.0732347	0.041647	0.0483156	1214
3	10	149.985	27.856	0.0720338	0.0268723	0.0993298	1215
3	10	149.95	29.5432	0.100741	0.0318482	0.0844244	1216
3	10	149.968	23.6184	0.0795008	0.0421524	0.0403727	1217
3	10	149.94	31.3925	0.0924507	0.0533261	0.0395156	1218
3	10	149.963	28.5337	0.098652	0.0308826	0.0780556	1219
3	10	149.962	32.5815	0.137827	0.0557646	0.0280393	1220
3	11	124.566	16.5936	0.0345321	0.0314996	0.0783745	1048
3	11	149.971	23.7179	0.0864597	0.0247261	0.114141	1049
3	11	149.964	24.3591	0.0482835	0.0403492	0.0525595	1050
3	11	149.947	21.5809	0.0839852	0.0565465	0.0321384	1051
3	11	149.946	27.4366	0.0738608	0.0553036	0.0328148	1054
3	11	149.96	22.2192	0.0959903	0.0575848	0.0345138	1055
3	11	149.934	25.0444	0.0774149	0.0716193	0.0191744	1056
3	11	149.918	23.6062	0.0862935	0.0653438	0.0169539	1057
3	11	149.876	14.3919	0.0469241	0.0252935	0.117293	1058
3	11	149.914	11.7934	0.134691	0.0686147	0.0180995	1059
3	11	146.521	11.3431	0.14116	0.0626941	0.0276775	1060
3	11	149.988	52.6377	0.19681	0.0436436	0.0444585	1232
3	11	149.957	24.7604	0.079762	0.0763945	0.0150821	1233
3	11	149.901	16.6043	0.114708	0.0673358	0.0265167	1234
3	11	149.977	36.0055	0.0991186	0.078103	0.0131481	1235
3	11	149.966	32.174	0.148934	0.0824298	0.0157513	1236
3	11	149.938	27.3179	0.0721634	0.0625104	0.019043	1237
3	11	149.972	28.3786	0.105928	0.0376328	0.0578008	1238
3	11	149.983	33.3972	0.0781193	0.0676311	0.0157716	1239
3	11	149.972	32.6995	0.130925	0.142531	0.00367047	1240
3	11	149.978	37.3656	0.086771	0.0756712	0.0140971	1241
3	11	104.054	26.2268	0.145871	0.0547693	0.0300476	1242
3	12	99.952	46.5624	0.17181	0.050172	0.0406102	96
3	12	149.959	39.1639	0.0574521	0.0537726	0.0267325	97
3	12	149.98	83.9112	0.21002	0.0585425	0.0308304	98
3	12	149.972	61.8984	0.0638992	0.0453342	0.045244	99
3	12	149.972	50.7895	0.0792758	0.0466031	0.037285	101
3	12	149.978	55.8548	0.076642	0.0577197	0.0269786	102
3	12	149.954	34.4105	0.0720558	0.0455923	0.0443798	103
3	12	149.983	77.1821	0.0911369	0.102312	0.0101935	104
3	12	149.984	52.7058	0.047529	0.0485082	0.0351676	105
3	12	149.961	42.1909	0.0541828	0.0631081	0.0237079	106
3	12	149.958	46.4329	0.0681226	0.048081	0.0400689	107
3	16	149.995	41.5415	0.0593465	0.0488357	0.0420478	5
3	16	119.992	42.1028	0.0766823	0.0815485	0.0162312	6
3	16	149.943	32.3856	0.0394194	0.0444293	0.0434514	7
3	16	149.969	58.1454	0.049405	0.0343618	0.0682339	8
3	16	149.977	39.6395	0.0612279	0.0398601	0.0583684	9
3	16	90.6218	81.7905	0.0544127	0.0454635	0.0464112	11
3	17	149.944	39.0345	0.098596	0.0490452	0.0374167	953
3	17	149.96	42.1046	0.0659036	0.0549097	0.0329427	956
3	17	124.457	53.89	0.125876	0.0620846	0.0210228	957
3	17	149.959	24.6535	0.0583944	0.0362281	0.0638355	960
3	17	149.978	75.538	0.117875	0.0482045	0.0390149	962
3	17	149.982	67.2882	0.0634414	0.0592783	0.0254657	963
3	18	149.971	49.4163	0.0651363	0.0488797	0.0357577	33
3	18	144.183	89.65	0.346488	0.0854623	0.0138481	36
3	18	96.1159	21.5781	0.090316	0.107659	0.0072324	121
3	18	149.934	15.6403	0.330462	0.204142	0.000852878	122
3	18	149.957	29.8418	0.0892806	0.0706206	0.0243575	123
3	18	149.816	21.2261	0.0992878	0.106895	0.0072327	124
3	18	109.981	41.9891	0.072963	0.0949257	0.00909485	125
3	18	92.0545	16.2295	0.311544	0.349056	0.00200803	126
3	18	149.977	29.4046	0.143238	0.181322	0.00566893	127
3	18	109.971	37.4462	0.0795358	0.0949256	0.00995629	128
3	18	149.968	41.0688	0.288815	0.146194	0.00487092	129
3	18	149.975	31.9786	0.0837142	0.0593281	0.030442	130
3	19	149.957	33.9831	0.112818	0.138786	0.00843799	161
3	19	149.963	34.6752	0.0921024	0.0656714	0.0213462	162
3	19	149.954	40.1656	0.0872557	0.100922	0.00730533	163
3	19	149.949	33.7582	0.0640163	0.0585798	0.0241011	164
3	19	149.976	32.5785	0.049226	0.0496464	0.036226	165
3	19	149.948	28.4298	0.0569214	0.0616037	0.0267417	166
3	19	149.957	37.004	0.0774787	0.0547972	0.0322581	167
3	19	149.958	34.3429	0.0972155	0.0733239	0.0172816	168
3	19	112.431	39.1617	0.0589439	0.067946	0.0183965	169
3	19	93.2184	54.7961	0.102197	0.067434	0.018011	170
3	22	133.788	33.3811	0.142373	0.065321	0.0232871	656
3	22	149.976	65.5703	0.23914	0.175612	0.00345739	657
3	22	149.991	111.1	0.105316	0.108479	0.00798128	659
3	22	149.955	30.8894	0.306413	0.238505	0.00172712	661
3	22	149.974	75.9267	0.11046	0.0666468	0.0197594	662
3	22	121.586	45.1121	0.0829289	0.0617543	0.0213309	663
3	22	126.704	30.662	0.227738	0.164892	0.0046332	664
3	22	109.955	16.1976	0.213539	0.188458	0.00505334	665
3	22	91.4853	143.411	0.0876646	0.0661624	0.0200457	666
3	22	149.99	107.307	0.0464697	0.0513086	0.0352905	667
3	22	149.965	48.738	0.112447	0.12266	0.00629361	668
3	24	108.478	129.63	0.104012	0.0878066	0.0115204	766
3	24	94.9894	89.41	0.0505108	0.0418902	0.0535735	767
3	25	99.9863	61.6885	0.0583543	0.0477627	0.0442607	64
3	25	149.995	113.01	0.122184	0.0638045	0.0246593	66
3	27	149.972	33.4862	0.194362	0.158215	0.00477897	681
3	27	149.989	82.1929	0.333747	0.160899	0.00478585	683
3	27	119.992	88.0724	0.0956149	0.0708319	0.0190197	685
3	27	149.992	160.661	0.125612	0.0866102	0.0148975	686
3	27	149.979	95.7204	0.233302	0.253612	0.00167177	687
3	27	149.981	44.6723	0.136637	0.128146	0.00597015	689
3	30	149.998	104.088	0.191279	0.218248	0.00230577	831
3	30	149.987	65.5522	0.0761853	0.0916526	0.0110862	838
3	30	149.921	20.224	0.164965	0.165471	0.00494723	839
3	30	149.985	94.2164	0.102005	0.0598693	0.0259713	840
3	30	149.974	58.5701	0.0956626	0.0907036	0.0134335	841
3	33	149.988	52.0909	0.136023	0.0964419	0.00998336	847
3	33	149.95	27.9161	0.1112	0.0337406	0.0826565	848
3	33	149.973	39.2803	0.0942903	0.090151	0.012901	849
3	33	149.986	15.6548	0.112004	0.0890834	0.00809199	852
3	34	149.984	66.6873	0.116311	0.142826	0.00709858	290
3	34	149.985	23.7823	0.137813	0.146069	0.00560695	291
3	34	149.974	61.1639	0.0874446	0.112989	0.0083942	292
3	34	149.956	32.3494	0.124704	0.123872	0.00515358	293
3	34	149.969	21.031	0.249232	0.247061	0.00443881	294
3	34	149.988	32.5759	0.102807	0.0851651	0.0169873	295
3	34	149.972	43.1614	0.0902027	0.0920303	0.0118956	296
3	34	149.991	97.719	0.0839667	0.0603826	0.0250392	297
3	35	90.0151	50.2804	1.85382	0.14116	0.0132567	18
3	35	149.983	36.5775	0.0577827	0.0558723	0.0320817	19
3	35	99.9828	58.3601	0.0849699	0.0997886	0.0114824	20
3	35	90.9844	32.1923	0.0283727	0.0296733	0.0918402	21
3	35	99.9926	34.3925	0.0523399	0.0429825	0.0412911	22
3	35	149.992	145.421	0.0431146	0.028321	0.106639	23
3	35	149.963	33.0748	0.070706	0.0307685	0.0909274	24
3	35	99.992	121.32	0.113194	0.0402913	0.055148	25
3	37	99.9834	66.671	0.120916	0.151583	0.00435044	52
3	37	99.9587	35.9248	0.059828	0.0536938	0.0406572	53
3	37	149.997	35.6807	0.0695865	0.0511628	0.0328849	54
3	37	99.9853	104.975	0.137914	0.131681	0.00714558	55
3	37	99.996	123.585	0.0774687	0.0730142	0.0161029	56
3	37	149.991	87.4987	0.0772237	0.050916	0.0339073	58
3	37	149.964	45.4976	0.122673	0.0560663	0.0326836	796
3	37	149.983	43.205	0.149263	0.0827306	0.0151235	798
3	37	118.583	30.3837	0.136836	0.100613	0.0113794	799
3	37	129.975	34.6143	0.0643596	0.0629622	0.0235608	800
3	37	149.982	55.8266	0.0816303	0.0956017	0.0143318	805
3	37	93.5514	104.766	0.0976674	0.0994372	0.00846852	806
3	47	149.967	44.0562	0.0502845	0.0566161	0.028606	807
3	47	149.984	62.8002	0.0900665	0.114522	0.00828113	815
3	47	149.981	55.2672	0.0508589	0.0420037	0.0527205	816
3	47	149.991	53.5365	0.098335	0.0840904	0.0180573	817
3	47	149.987	59.4452	0.063747	0.060237	0.0317407	818
3	47	104.281	72.9954	0.256855	0.138387	0.0277194	824
3	47	149.995	114.824	0.103311	0.0672372	0.0240957	825
3	62	105.418	174.42	0.0680332	0.0728696	0.0137597	701
3	62	149.999	86.6538	0.0886762	0.102657	0.0111556	702
3	62	149.987	38.3634	0.179521	0.11403	0.00990615	706
3	62	109.985	72.8828	0.0741202	0.0394684	0.0581337	708
3	63	109.984	64.1823	0.0941066	0.119015	0.00623318	475
3	63	149.987	104.522	0.200222	0.229182	0.00229636	476
3	65	96.8309	70.7728	0.141765	0.110358	0.00963082	211
3	65	149.993	80.4037	0.0673797	0.0468227	0.041874	212
3	65	149.982	90.3443	0.139708	0.119781	0.00907749	213
3	65	149.981	64.6884	0.137657	0.0518663	0.0408163	214
3	65	149.988	73.2127	0.118375	0.140221	0.00582825	215
3	65	149.994	96.8504	0.0937722	0.0864763	0.0159703	216
3	65	119.996	102.911	0.13736	0.168262	0.00412989	217
3	65	149.968	59.466	0.11061	0.0643511	0.0237721	218
3	69	149.996	77.4554	0.0832108	0.0914744	0.0127389	221
3	69	149.985	50.8649	0.0657552	0.0720032	0.023332	230
3	69	104.441	60.273	0.117501	0.0533296	0.0327244	231
3	69	149.989	81.126	0.0641126	0.0769906	0.0163544	232
3	70	149.996	47.2545	0.0465213	0.053768	0.0393623	240
3	70	128.842	41.2598	0.0686336	0.0808	0.0163657	241
3	70	149.978	50.7474	0.0671227	0.0465059	0.0411247	242
3	70	100.178	39.3199	0.086758	0.113055	0.00913938	243
3	70	149.974	43.9342	0.0499338	0.0605886	0.0241311	244
3	70	149.984	48.9384	0.10131	0.0601297	0.0252044	245
3	70	149.98	77.6368	0.145912	0.0542623	0.0309172	246
3	70	149.979	75.4705	0.0656797	0.0756661	0.0179344	261
3	71	149.929	29.5673	0.107324	0.0962353	0.011279	262
3	71	149.963	45.4513	0.100452	0.0690973	0.0190728	263
3	71	145.385	37.1496	0.104082	0.121083	0.00740604	264
3	71	102.398	47.1395	0.171082	0.110246	0.00559354	265
3	71	149.966	26.6527	0.123117	0.153714	0.00575432	266
3	71	149.991	85.7717	0.236406	0.141164	0.00528566	267
3	71	149.99	47.743	0.105004	0.085854	0.0136852	268
3	71	149.986	77.2674	0.064665	0.0745237	0.0180343	269
3	71	105.934	35.1067	0.101497	0.125253	0.00484001	270
3	71	129.634	53.3193	0.0713376	0.0724543	0.0182292	282
3	71	149.995	49.8484	0.0631215	0.0548312	0.0308947	283
3	71	149.984	60.7533	0.0876714	0.103697	0.00888938	284
3	71	149.99	65.8644	0.107442	0.0660442	0.022978	285
3	71	149.964	28.0668	0.131227	0.0987873	0.00950344	286
3	71	149.996	82.289	0.148668	0.199323	0.00348376	287
3	71	149.964	79.9125	0.269772	0.250021	0.00158545	288
3	75	149.99	94.4927	0.0852588	0.0734433	0.0222254	592
3	75	149.993	51.3159	0.204445	0.106566	0.0106535	593
3	75	149.981	80.4435	0.157076	0.09064	0.0113552	594
3	75	149.986	89.9818	0.105767	0.113209	0.0074837	595
3	76	119.984	93.1787	0.424328	0.0963883	0.0177102	612
3	76	99.9836	116.349	0.132987	0.0650312	0.0256168	613
3	76	149.984	72.6745	0.162295	0.223345	0.0033945	614
3	90	149.98	72.9033	0.0900952	0.121708	0.00804829	719
3	90	119.984	76.5105	0.0849675	0.0957776	0.0077342	720
3	90	149.978	76.1847	0.173085	0.118415	0.00691406	722
3	90	149.991	75.7781	0.104021	0.0704044	0.0185641	723
3	90	149.978	49.8138	0.493922	0.148112	0.00749565	731
3	91	149.997	62.6813	0.107643	0.10393	0.00861519	738
3	91	149.977	59.3357	0.0640638	0.0678197	0.0204517	739
3	161	149.99	40.0295	0.157388	0.144165	0.00732845	879
3	173	149.984	32.3635	0.0365958	0.0420862	0.0537701	854
3	198	99.9191	31.7657	0.115543	0.120024	0.00661626	173
3	198	149.973	54.083	0.10132	0.127412	0.00789052	174
3	198	149.993	39.0085	0.10628	0.0755069	0.0160656	175
3	198	139.994	64.0026	0.122925	0.143215	0.00368304	176
3	198	149.987	61.0721	0.139299	0.194154	0.00305677	178
3	198	147.037	7.83479	2.08233	0.772037	0	179
3	198	106.694	70.7441	0.116211	0.0812572	0.0165607	180
3	198	149.985	80.4683	0.311482	0.0715754	0.0213771	181
3	198	149.973	75.1937	0.215187	0.0891061	0.012858	182
3	239	149.983	28.3765	0.127287	0.10239	0.00869361	337
3	239	149.971	70.3938	0.105996	0.0757295	0.0189448	338
3	239	149.994	95.1237	0.184856	0.272981	0.00168209	339
3	240	149.986	52.2248	0.0863926	0.116631	0.00472361	340
3	240	149.98	57.041	0.0466916	0.0612047	0.0250146	341
3	240	149.978	52.1943	0.0837458	0.108679	0.0109862	342
3	240	149.981	67.2352	0.113619	0.0957027	0.0116025	343
3	240	149.983	101.452	0.105082	0.100445	0.00985804	344
3	240	129.979	55.2399	0.0878416	0.119506	0.00529248	345
3	240	149.991	94.446	0.0722187	0.0635779	0.0273895	346
3	240	149.994	96.6305	0.07331	0.0669074	0.0193183	348
3	288	149.816	9.42487	0.798283	0.235497	0.00991501	83
3	288	149.964	47.6913	0.107285	0.140103	0.00405481	84
3	288	149.979	54.6345	0.139803	0.0888891	0.0109836	85
3	288	149.981	41.9253	0.21275	0.0933663	0.0109733	86
3	288	149.937	39.6032	0.164839	0.077011	0.0151566	87
3	288	149.984	47.8252	0.0752861	0.078094	0.0153353	88
3	288	149.98	59.0147	0.0749076	0.0785321	0.0207886	89
3	288	149.972	59.4378	0.125293	0.157714	0.00336549	90
3	288	149.962	35.6358	0.0599442	0.0490321	0.0346183	91
3	288	149.949	35.1985	0.0973723	0.0554227	0.030504	92
3	288	149.982	29.7435	0.159148	0.13856	0.00313831	93
3	288	112.37	15.7248	0.112615	0.132617	0.00509338	94
3	288	99.9639	26.0994	0.0560662	0.0413238	0.0525105	95
3	378	140.124	42.0629	0.242186	0.0826119	0.0154394	326
3	378	149.98	52.3137	0.0641052	0.0745662	0.0172062	327
3	378	149.955	30.4092	0.0883721	0.0841403	0.0140351	328
3	378	149.982	68.9415	0.0882114	0.106399	0.0106383	329
3	378	101.388	37.2234	0.0642314	0.0583777	0.0294118	330
3	378	121.083	61.1564	0.0642013	0.0546148	0.0314652	331
3	378	149.988	90.6939	0.106102	0.0932228	0.0119091	332
3	378	149.961	44.158	0.0878403	0.0516026	0.0392631	333
3	378	149.985	58.6991	0.0674198	0.0799558	0.0155611	334
3	378	149.113	49.3652	0.0333927	0.0332709	0.0804239	335
3	378	94.5048	76.3347	0.123166	0.0658576	0.0206543	336
10	3	145.483	0.543018	0.749998	0.778177	0	855
10	3	149.597	3.02145	0.695275	0.334584	0	856
10	3	149.789	6.80956	0.259376	0.355284	0	857
10	3	149.955	12.397	0.259366	0.225393	0.00430339	859
10	3	149.695	3.35348	0.243124	0.193644	0	860
10	3	149.71	6.23873	0.267274	0.144955	0.00428266	861
10	3	147.597	2.62201	1.09832	1.25184	0	941
10	3	149.912	4.48263	0.36222	0.340655	0.00297619	942
10	3	119.516	3.41377	0.514732	0.364919	0.00980392	944
10	3	120.435	10.487	0.535524	0.709651	0	950
10	4	149.358	1.94833	0.62825	0.222623	0	642
10	4	149.438	1.63948	0.266467	0.141832	0	777
10	4	137.45	3.20117	0.513118	0.439783	0	778
10	4	149.431	2.13476	0.274436	0.208287	0.00626959	779
10	4	149.618	1.5974	0.247307	0.236189	0	780
10	4	147.925	0.784182	0.627228	0.348175	0	781
10	4	149.739	4.08712	0.177384	0.168682	0.00326797	789
10	4	149.779	5.22102	0.22956	0.0956869	0	790
10	8	149.891	17.0057	0.536338	0.144502	0.0102001	526
10	8	149.919	11.5862	0.482729	0.262348	0.00345423	528
10	8	149.828	5.35948	1.40826	0.647342	0	529
10	8	149.911	6.94414	0.287452	0.228515	0.00192123	530
10	8	149.889	10.6079	0.142054	0.150189	0.00125786	531
10	8	149.941	11.7779	0.440268	0.360983	0.00226501	532
10	8	148.855	1.20923	0.155971	0.161017	0	534
10	8	149.816	9.76531	0.0682336	0.0676968	0.0177717	535
10	9	119.959	15.6303	0.281441	0.134294	0.00693333	551
10	9	149.934	21.4495	0.208429	0.047078	0.0429104	552
10	9	149.92	11.7062	0.0548736	0.0391965	0.0683761	553
10	9	149.964	26.613	0.0786968	0.0915071	0.00876973	554
10	9	149.945	21.0078	0.579072	0.274481	0.00253968	555
10	9	149.942	15.8661	1.06021	0.511842	0	556
10	9	149.94	17.3269	0.108133	0.0852336	0.0127021	557
10	9	149.97	8.61506	0.148877	0.142479	0	571
10	9	149.877	9.83475	0.109087	0.106513	0.00814111	572
10	9	149.901	11.8678	0.16516	0.167904	0.00393479	573
10	9	139.949	6.01647	1.28227	0.709476	0	574
10	9	149.931	9.16419	0.160165	0.168749	0.00582242	575
10	9	149.91	17.0903	0.399954	0.584369	0	576
10	9	149.984	32.5235	0.129858	0.106666	0.00902009	579
10	9	149.941	16.4398	0.069815	0.0598622	0.0223124	580
10	9	149.971	26.5717	0.067561	0.0664158	0.0132999	581
10	9	149.985	28.2229	0.102113	0.113156	0.00708717	582
10	10	149.944	25.3095	0.0527105	0.0303875	0.0816864	1190
10	10	149.87	11.6368	0.0824711	0.0482998	0.0447248	1191
10	10	149.843	11.0382	0.0643068	0.0394502	0.0538089	1192
10	10	149.952	21.0534	0.0776841	0.0571785	0.0313589	1193
10	10	149.924	17.8558	0.177803	0.0460955	0.0478147	1194
10	10	149.916	20.665	0.103874	0.0419269	0.045836	1195
10	10	138.355	26.8224	0.113105	0.0768075	0.017246	1196
10	10	149.973	23.791	0.107982	0.0732024	0.0213004	1197
10	10	149.978	16.6824	0.0662382	0.0455563	0.0419664	1198
10	10	149.968	29.9931	0.0922044	0.0432432	0.0431303	1199
10	10	149.984	23.4492	0.0851993	0.037506	0.0602786	1200
10	10	149.913	22.9066	0.132573	0.107636	0.00844496	1201
10	10	149.994	24.541	0.0796131	0.0391855	0.0611247	1202
10	10	149.962	24.0194	0.0875525	0.0688901	0.0199889	1203
10	10	149.93	17.1013	0.181194	0.0232012	0.156006	1204
10	11	149.953	28.6624	0.0397599	0.0339325	0.0653792	1038
10	11	149.949	22.6543	0.0412837	0.0402771	0.0621136	1039
10	11	149.987	28.0557	0.0560387	0.0534632	0.0297053	1040
10	11	149.984	25.7494	0.052855	0.0506464	0.0339202	1042
10	11	149.92	22.1452	0.0459227	0.0321501	0.0816265	1043
10	11	149.932	16.4141	0.0351566	0.0364761	0.0617635	1045
10	11	149.967	24.6387	0.0634157	0.0545345	0.032747	1046
10	11	149.947	27.5163	0.0527837	0.0295251	0.092826	1047
10	11	149.962	19.1316	0.0839498	0.0595525	0.0240502	1062
10	11	149.964	48.4515	0.141265	0.0489749	0.031379	1221
10	11	149.99	56.8972	0.151313	0.173499	0.00398406	1222
10	11	149.995	34.8412	0.0958664	0.0516852	0.0329124	1223
10	11	149.95	26.1755	0.0604837	0.0427082	0.0545223	1224
10	11	149.974	30.1986	0.0606272	0.0333788	0.0695518	1225
10	11	149.96	38.317	0.0633002	0.0618904	0.020362	1226
10	11	149.981	33.1443	0.0935192	0.0419376	0.044659	1227
10	11	149.971	35.0668	0.0631609	0.0506743	0.0283324	1228
10	11	149.968	25.2321	0.062544	0.0191048	0.194767	1229
10	11	149.95	33.0777	0.0956967	0.0204099	0.179032	1230
10	11	149.864	7.70701	0.133291	0.059402	0.0268398	1231
10	11	149.971	30.886	0.105501	0.0307685	0.0759931	1244
10	12	107.956	35.1069	0.0735539	0.0527872	0.0408971	108
10	12	149.975	40.1799	0.0409609	0.0436351	0.0451377	109
10	12	149.981	29.4838	0.0532222	0.046505	0.0409317	110
10	12	149.975	35.1326	0.0496818	0.0435872	0.0476371	111
10	12	149.98	31.7975	0.0608664	0.0411507	0.0515831	112
10	12	149.958	29.1415	0.06134	0.051753	0.0306636	113
10	12	149.977	33.4984	0.0610418	0.046771	0.0499602	114
10	12	149.96	27.9142	0.0933696	0.0390347	0.0654563	115
10	12	149.947	33.8452	0.051181	0.0521471	0.0307389	116
10	12	149.966	30.3601	0.0438243	0.0396712	0.0551285	117
10	12	149.98	27.0502	0.064744	0.0408751	0.0532413	118
10	12	149.984	40.5643	0.0383866	0.0339514	0.0687048	119
10	12	99.9733	34.6993	0.180842	0.028638	0.110118	120
10	16	149.996	36.7611	0.090381	0.0405225	0.0554951	1
10	16	149.987	55.378	0.046764	0.029474	0.0923429	2
10	16	149.967	40.8024	0.0400865	0.0460503	0.0467397	3
10	16	149.966	30.5269	0.0297819	0.0321446	0.0865007	4
10	16	148.968	2.70527	0.936945	1.29675	0	12
10	16	149.97	43.5953	0.0281853	0.0270225	0.118538	13
10	16	149.964	26.5397	0.0435207	0.0272249	0.105779	14
10	16	149.95	30.3368	0.0620023	0.0317191	0.0848538	15
10	16	149.978	38.739	0.0322171	0.0280441	0.0989673	16
10	16	149.98	45.4861	0.0409299	0.0278314	0.0960129	17
10	17	132.573	40.6117	0.0467224	0.0450692	0.0486627	964
10	17	149.962	49.7993	0.0344176	0.034263	0.07579	966
10	18	149.964	26.4263	0.0401269	0.0272774	0.119606	29
10	18	149.925	15.341	0.0340257	0.0262583	0.118696	30
10	18	149.897	15.8375	0.0404455	0.0283732	0.105729	31
10	18	149.94	53.0945	0.0730677	0.0215679	0.152745	38
10	18	149.964	36.9289	0.0479877	0.0378429	0.0599494	39
10	18	149.953	32.6637	0.0359363	0.0365628	0.0675786	40
10	18	149.964	43.5103	0.0384737	0.0377127	0.0731034	41
10	18	149.98	53.0203	0.0461701	0.0480296	0.040493	131
10	18	108.087	43.1689	0.0909758	0.114165	0.00428633	132
10	18	149.96	43.4115	0.0851122	0.0509329	0.0425499	133
10	18	149.985	29.5095	0.0455466	0.0265405	0.113873	134
10	18	149.963	35.8756	0.144217	0.0299341	0.0951673	135
10	18	104.332	50.4929	0.047245	0.0465314	0.0487851	136
10	18	149.962	32.5282	0.0447819	0.0252708	0.131611	137
10	18	132.372	41.4212	0.046717	0.04662	0.0465074	138
10	18	149.988	53.3708	0.0702485	0.0409118	0.0613367	139
10	18	149.979	58.428	0.04439	0.0530938	0.0320666	140
10	18	94.6662	40.4051	0.108798	0.0309788	0.0938562	141
10	19	149.971	56.2241	0.128679	0.143326	0.00498102	44
10	19	129.99	110.862	0.0556848	0.0545175	0.0363611	45
10	19	99.771	19.1438	0.130734	0.0424605	0.0481675	144
10	19	149.982	20.029	0.0561348	0.0332452	0.0735686	145
10	19	149.824	12.8284	0.0997041	0.0378661	0.0582726	146
10	19	149.867	10.4426	0.0744324	0.0442948	0.0421725	147
10	19	149.925	18.2158	0.053771	0.0299858	0.0834859	148
10	19	149.948	15.7055	0.0710448	0.0384512	0.0564756	149
10	19	149.96	17.7781	0.101849	0.0246956	0.114029	150
10	19	149.904	17.2311	0.0488426	0.0229341	0.15602	151
10	19	149.983	11.1746	0.161214	0.0370142	0.0435561	152
10	19	149.949	16.6723	0.080174	0.0330741	0.0632	153
10	19	149.95	14.6515	0.0427414	0.034187	0.0655439	154
10	19	149.975	24.3908	0.0451989	0.0260437	0.0978677	155
10	19	149.947	19.5869	0.120593	0.0312438	0.0898876	156
10	19	149.968	23.285	0.0739011	0.0318742	0.0833333	157
10	19	149.97	15.7832	0.130457	0.0242823	0.133502	158
10	19	149.876	18.1084	0.118125	0.0327575	0.0700074	159
10	19	149.952	41.6266	0.0648547	0.0414459	0.051586	160
10	22	129.781	46.4936	0.157882	0.0373379	0.0667882	646
10	22	149.984	70.0143	0.132776	0.0418964	0.0538996	648
10	22	149.923	22.4715	0.174771	0.0402464	0.0587711	649
10	22	149.906	17.8445	0.307951	0.0433124	0.0471028	650
10	22	149.983	45.7986	0.0366119	0.0357421	0.0642015	652
10	22	149.967	41.9492	0.109156	0.0377008	0.0573836	654
10	22	112.262	61.0356	0.0624232	0.0395852	0.0601284	655
10	22	100.744	31.9324	0.0501968	0.0326217	0.0724277	669
10	22	149.939	26.4174	0.181985	0.0361758	0.0550366	670
10	22	149.973	28.9586	0.17095	0.0428296	0.0439788	671
10	22	149.946	49.431	0.21027	0.0431968	0.0461414	672
10	22	149.968	42.4759	0.0390414	0.0286299	0.102512	880
10	24	104.733	99.1192	0.100201	0.0959957	0.0100183	755
10	24	149.978	52.8743	0.0593094	0.0457006	0.0533417	756
10	24	149.987	64.0522	0.0825686	0.0921221	0.0109295	757
10	24	149.98	53.3271	0.0929011	0.064026	0.0237559	758
10	24	149.973	50.7625	0.0683232	0.0507751	0.0408512	759
10	24	149.963	42.037	0.108343	0.0452928	0.0460025	760
10	24	149.986	44.4441	0.0479889	0.0415222	0.0526553	761
10	24	149.968	30.3797	0.135364	0.0589271	0.0340211	762
10	24	149.707	5.28365	0.252204	0.108306	0.0101138	763
10	24	149.957	14.3374	0.112157	0.0408974	0.0395349	764
10	25	149.995	82.3225	0.164135	0.0403064	0.0616294	67
10	25	149.974	105.618	0.24718	0.0401177	0.0623737	68
10	25	149.984	78.915	0.0662518	0.0464526	0.0410612	69
10	25	149.962	40.0768	0.17096	0.0376352	0.0613977	70
10	27	149.925	17.7623	0.105343	0.0801897	0.0191513	673
10	27	149.977	45.0736	0.0347458	0.0250526	0.134467	674
10	27	101.278	66.569	0.0551856	0.0651466	0.0200237	675
10	27	149.985	87.0619	0.0529402	0.057126	0.0294838	676
10	27	149.977	70.2175	0.083869	0.0878795	0.0131991	677
10	27	149.982	100.145	0.0567578	0.0697713	0.0190413	678
10	27	149.986	85.2746	0.0649792	0.0768202	0.0167318	679
10	27	149.96	40.0573	0.148269	0.0871855	0.0164808	691
10	27	97.8139	84.5688	0.144695	0.0604068	0.0227273	692
10	27	149.97	62.0522	0.200243	0.0643984	0.0206319	693
10	30	109.969	26.3257	0.0310061	0.0214816	0.164076	826
10	30	149.944	21.1545	0.0884242	0.0199368	0.192938	827
10	30	149.956	26.9812	0.0416093	0.0166033	0.243945	828
10	30	149.984	38.1507	0.0556957	0.0240154	0.128626	829
10	30	149.984	30.9099	0.0589574	0.02409	0.127481	833
10	30	149.971	26.5251	0.0460453	0.0209547	0.163399	834
10	30	149.918	35.0391	0.170243	0.0230644	0.165049	835
10	30	149.954	25.4811	0.100309	0.0199187	0.175085	836
10	33	149.911	18.3843	0.0329114	0.0268871	0.124456	843
10	33	149.975	5.97434	0.696636	0.59016	0	844
10	33	149.896	19.9404	0.0462211	0.0268015	0.115089	845
10	33	149.983	19.3889	0.0848519	0.0382744	0.0663686	846
10	34	149.956	37.8178	0.0864092	0.0367608	0.0671839	298
10	34	149.998	72.0077	0.0844928	0.0559479	0.0349042	299
10	34	146.067	39.9886	0.077946	0.0872178	0.0214004	300
10	34	149.988	42.45	0.0895845	0.115557	0.0117795	301
10	34	149.982	39.6582	0.0824252	0.100017	0.0117687	302
10	34	149.992	70.8704	0.0591278	0.0722297	0.0187206	304
10	34	99.992	101.498	0.167035	0.102678	0.0158636	305
10	34	149.999	64.1406	0.139151	0.123281	0.00519696	306
10	34	149.981	64.1349	0.139251	0.12332	0.00519805	307
10	34	149.989	79.3725	0.0661534	0.0757384	0.0149517	308
10	34	102.965	73.5591	0.154136	0.0776869	0.0168999	309
10	34	149.985	84.8282	0.0795837	0.0829088	0.015248	310
10	35	149.99	32.8355	0.251763	0.0527531	0.0751269	26
10	35	149.988	26.8888	0.0325747	0.018193	0.191669	27
10	35	149.981	105.727	0.068602	0.0831354	0.0150091	28
10	37	149.978	28.2574	0.0580959	0.0226016	0.138981	46
10	37	149.977	28.8045	0.0364964	0.027832	0.108796	47
10	37	149.968	33.0603	0.181086	0.0259898	0.120815	48
10	37	149.997	79.0283	0.0472014	0.032275	0.0871436	49
10	37	149.973	29.3719	0.0327079	0.0239135	0.131669	50
10	37	149.946	19.1069	0.0674343	0.0676497	0.0254799	793
10	37	149.689	13.5481	0.269483	0.0350287	0.0616371	794
10	37	149.957	40.4649	0.232835	0.050288	0.0446605	802
10	37	149.97	50.4101	0.0443813	0.0431505	0.0519841	803
10	37	149.983	72.5549	0.0510048	0.0622569	0.0289469	804
10	39	149.971	46.2289	0.0230191	0.0195859	0.188951	853
10	47	149.969	47.0497	0.0372785	0.0229065	0.142432	808
10	47	149.966	31.3339	0.0354823	0.0364526	0.057459	809
10	47	149.913	14.7886	0.0711044	0.0470909	0.0279657	810
10	47	149.989	96.7671	0.0593795	0.0461142	0.0431997	811
10	47	149.989	104.148	0.0602952	0.045429	0.0446834	812
10	47	149.985	72.4938	0.0476732	0.037916	0.0596891	813
10	47	149.983	38.4911	0.0532417	0.0250847	0.127317	814
10	47	149.965	36.1485	0.0362842	0.0225494	0.143147	819
10	47	149.983	28.61	0.0657566	0.0551523	0.030529	820
10	47	149.978	56.3216	0.0716839	0.0236571	0.137682	821
10	47	149.975	53.7956	0.0411859	0.0181823	0.205255	822
10	47	149.965	30.7539	0.0283511	0.0267167	0.109931	823
10	62	149.967	55.412	0.110749	0.0963358	0.0120337	695
10	62	149.997	58.0947	0.0416108	0.0418693	0.0503787	696
10	62	149.968	46.4231	0.105873	0.0493937	0.0366274	697
10	62	149.962	53.567	0.0978614	0.0438594	0.0487987	699
10	62	149.924	15.7346	0.198998	0.149847	0.00169563	700
10	62	119.987	63.4568	0.117721	0.091999	0.0131337	704
10	62	149.987	22.2353	0.0975646	0.048802	0.0368816	705
10	63	149.987	49.0308	0.08274	0.0417397	0.0509927	472
10	63	149.982	62.9007	0.0634108	0.0446257	0.0437778	473
10	63	149.983	50.4791	0.12754	0.0500307	0.0361907	474
10	65	149.97	31.6798	0.0600166	0.0274395	0.0997685	197
10	65	149.996	37.0744	0.0866121	0.0260744	0.115627	198
10	65	149.946	30.9246	0.135473	0.0350151	0.072245	199
10	65	149.968	31.7402	0.0456542	0.0407793	0.0502101	200
10	65	149.941	25.2365	0.0672963	0.0303456	0.0911734	201
10	65	149.946	37.3334	0.122411	0.0322137	0.0857449	203
10	65	149.585	36.2937	0.0549777	0.0400941	0.0537852	204
10	65	149.976	33.9654	0.0620612	0.039461	0.0581076	205
10	65	149.966	45.5505	0.0451201	0.0315672	0.0892988	207
10	65	149.973	39.7804	0.0499239	0.0285006	0.102581	208
10	65	149.973	36.54	0.0679881	0.0293327	0.0976277	209
10	69	149.974	57.5701	0.0273227	0.0217824	0.159833	220
10	69	131.657	103.261	0.130441	0.0631142	0.0292755	222
10	69	149.987	38.6101	0.0426196	0.0271698	0.116215	223
10	69	149.991	85.0117	0.126755	0.0496485	0.036154	224
10	69	149.995	87.3429	0.0619207	0.0418244	0.0470193	225
10	69	149.983	48.5323	0.0663113	0.0256546	0.124605	226
10	69	149.983	79.1623	0.0932685	0.0513031	0.0364693	227
10	69	149.97	61.159	0.107649	0.0560187	0.0382686	228
10	69	149.965	40.1826	0.0358234	0.0230609	0.15848	234
10	69	149.973	41.2208	0.0794856	0.0232231	0.146555	235
10	69	149.971	47.149	0.0312776	0.0298296	0.0956018	236
10	69	149.958	38.4441	0.0297735	0.0165396	0.276323	237
10	69	149.976	33.672	0.184474	0.0209335	0.168515	238
10	70	99.3911	20.6356	0.0393243	0.0187244	0.228669	247
10	70	149.974	30.5921	0.039946	0.0259792	0.127942	248
10	70	149.984	44.9916	0.0375725	0.0312928	0.0899526	249
10	70	149.951	33.4643	0.1518	0.0370594	0.064169	250
10	70	149.996	42.0544	0.0256764	0.0208157	0.179613	251
10	70	149.964	57.3203	0.140921	0.0313563	0.0842252	252
10	70	149.966	34.7546	0.0291149	0.0206172	0.172678	253
10	70	149.988	58.2514	0.151299	0.0302552	0.0937393	254
10	70	149.96	47.1326	0.2987	0.0420529	0.0553198	256
10	70	128.487	46.456	0.0646948	0.0250828	0.153627	257
10	70	149.967	50.3709	0.0247852	0.0228348	0.146412	258
10	70	149.99	73.8982	0.126279	0.0386313	0.0577409	259
10	70	149.988	73.119	0.173643	0.0353542	0.0694812	260
10	71	149.965	50.925	0.0492709	0.0332255	0.0713631	271
10	71	149.973	34.9995	0.0306555	0.0347546	0.0678224	272
10	71	149.974	26.9913	0.100364	0.0274633	0.103261	273
10	71	149.972	28.6319	0.156136	0.0409103	0.0523987	274
10	71	149.955	25.3076	0.088842	0.0299303	0.0951252	275
10	71	149.959	46.8062	0.24852	0.0329097	0.0813506	276
10	71	149.97	50.4166	0.181496	0.0476673	0.0480095	277
10	71	148.506	37.103	0.27131	0.0376133	0.076225	278
10	71	144.936	61.2064	0.179858	0.045064	0.0537707	279
10	75	149.991	78.5182	0.124514	0.0703012	0.0213976	589
10	75	149.982	35.5176	0.0606481	0.0355527	0.0640135	590
10	75	149.988	45.597	0.0500818	0.0403677	0.0548326	591
10	76	99.9929	108.518	0.396041	0.0977745	0.0265413	608
10	76	149.967	39.4687	0.288291	0.0719157	0.0214563	609
10	76	149.993	117.505	0.0750702	0.0389194	0.0601986	610
10	76	149.994	116.984	0.0705551	0.055252	0.0295207	611
10	90	94.8812	42.0104	0.0287068	0.0254152	0.127697	710
10	90	149.99	52.1102	0.0300992	0.0316817	0.0804759	711
10	90	149.985	61.286	0.0379381	0.0428469	0.0537424	712
10	90	149.986	71.9667	0.0491862	0.0438355	0.0509542	714
10	90	149.978	62.7694	0.0587538	0.0366522	0.0668154	716
10	90	149.962	29.8076	0.0387118	0.0292852	0.0975391	724
10	90	149.993	36.6085	0.0540086	0.0382403	0.0590056	725
10	90	149.942	21.635	0.0659451	0.0247784	0.143033	726
10	90	149.958	25.1604	0.0357948	0.0239178	0.12987	727
10	90	145.425	44.9235	0.0398059	0.0387238	0.0518904	728
10	91	149.976	78.239	0.08129	0.0406967	0.0542867	735
10	91	149.983	73.2017	0.039593	0.0320558	0.0769651	736
10	95	149.987	84.7674	0.0568221	0.0588064	0.0271354	698
10	198	149.965	36.5152	0.0463711	0.0298552	0.0969686	184
10	198	149.965	25.7927	0.0495228	0.0295892	0.0992761	185
10	198	149.964	29.8672	0.0802325	0.0299177	0.0821612	186
10	198	149.938	21.829	0.0575073	0.0361304	0.0745493	187
10	198	149.97	47.9228	0.0497772	0.0388025	0.0614999	188
10	198	149.969	28.4793	0.0652026	0.0335952	0.0810115	189
10	198	149.967	37.2481	0.0565192	0.0406675	0.0624776	190
10	198	149.987	58.4319	0.0559005	0.0407495	0.0551118	191
10	198	149.962	45.6982	0.129431	0.0405373	0.0499052	192
10	198	149.983	45.2317	0.0930197	0.043651	0.0454009	193
10	198	149.99	41.6694	0.133691	0.0439332	0.03776	194
10	240	149.994	77.0428	0.0528784	0.0384397	0.0605746	349
10	240	149.973	61.2512	0.0318418	0.0368752	0.0697801	350
10	240	120.061	65.1585	0.0315176	0.0278082	0.105714	351
10	240	149.982	62.821	0.0684244	0.0374084	0.0670771	352
10	240	149.987	75.393	0.0366366	0.0231865	0.135391	353
10	240	149.982	65.3013	0.082331	0.0321651	0.0878089	354
10	240	149.991	66.7041	0.149456	0.0316606	0.0918541	355
10	288	119.947	24.0605	0.0677983	0.04084	0.0762301	71
10	288	149.934	19.8821	0.0745573	0.0344747	0.0868836	72
10	288	149.958	14.3107	0.0503674	0.0266235	0.117428	73
10	288	149.953	11.0568	0.0515968	0.0409752	0.0482509	74
10	288	149.926	17.5753	0.0565703	0.037855	0.0565465	75
10	288	149.942	28.3442	0.037846	0.035742	0.0774118	76
10	288	92.6281	28.5011	0.0390115	0.0314925	0.0746212	77
10	288	149.943	28.1307	0.0726517	0.0364937	0.0723092	78
10	288	149.956	27.0213	0.0509588	0.0355523	0.0895854	79
10	288	149.989	37.3894	0.0531477	0.0431012	0.0538516	80
10	288	149.985	39.844	0.0475599	0.0436411	0.0445114	81
10	288	149.986	43.2839	0.0337993	0.0332288	0.0824091	82
10	378	149.975	43.1407	0.0246005	0.0225333	0.154096	311
10	378	149.958	35.6167	0.0273972	0.0233909	0.156899	312
10	378	149.982	34.2375	0.0741399	0.0347293	0.0757546	313
10	378	149.972	35.6001	0.0307564	0.0223185	0.163701	314
10	378	149.964	29.167	0.0866907	0.0529368	0.0322359	315
10	378	149.959	31.9754	0.0728192	0.0311334	0.086757	316
10	378	149.974	36.2529	0.051898	0.027826	0.124333	317
10	378	149.967	40.4422	0.0619907	0.0278546	0.102885	318
10	378	149.995	36.7811	0.0524359	0.0354554	0.0870038	319
10	378	149.976	40.5931	0.138	0.029783	0.101511	320
10	378	149.964	31.8343	0.0260268	0.0275622	0.104315	321
10	378	149.976	57.3559	0.0446216	0.0337417	0.0802139	322
10	378	149.954	40.4591	0.0368208	0.0392172	0.0586781	323
10	378	149.983	39.4445	0.0928141	0.0265087	0.119337	324
10	378	149.969	33.2135	0.0811492	0.0281712	0.107007	325
