# Supplementary material for: Differential spatiotemporal development of Purkinje cell populations and cerebellum-dependent sensorimotor behaviors
Source: eLife. 2021 May 11;10:e63668. doi: 10.7554/eLife.63668 (PMC8195607; doi:10.7554/eLife.63668)
Supplement: Figure 3—figure supplement 1—source data 1. [file elife-63668-fig3-figsupp1-data1.xlsx]

## Sheet: PC data total zeros
ID	AGE	Lobule	Apex_Base_Sulcus
Cell 55	19	10	B
Cell 56	19	10	B
Cell 57	65	10	B
Cell 58	69	3	B
Cell 59	70	10	B
Cell 5	107	1	B
Cell 2	48	2	A
Cell 4	49	10	B
Cell 9	55	10	B
Cell 3	49	3	A
Cell 1	57	3	S
Cell 8	57	10	A
Cell 6	57	10	A
Cell 72	63	3	S
Cell 86	49	3	A
Cell 87	49	10	B
Cell 88	49	3	S
Cell 84	127	2	B
Cell 64	127	7	S
Cell 62	127	8	B
Cell 63	127	7	B
Cell 85	128	7	S
Cell 65	128	3	A
Cell 61	128	3	B
Cell 73	7	3	B
Cell 74	7	10	S
Cell 75	7	10	S
Cell 76	7	10	S
Cell 77	7	10	B
Cell 78	7	10	A
Cell 79	7	10	A
Cell 80	7	10	A
Cell 81	7	10	A
Cell 82	8	9	B
Cell 83	8	9	S
Cell 89	8	10	A
Cell 90	8	10	B
Cell 91	8	10	B
Cell 92	8	10	A
Cell 93	8	10	B
Cell 94	9	3	A
Cell 95	9	3	S
Cell 97	9	8	S
Cell 96	9	10	A
Cell 98	9	10	A
Cell 99	9	10	B
Cell 100	9	10	A
Cell 101	75	3	B
Cell 102	75	3	B
Cell 103	75	10	A
Cell 104	4	10	S
Cell 105	4	10	A
Cell 106	4	10	S
Cell 107	4	3	B
Cell 108	4	3	A
Cell 109	22	10	S
Cell 110	22	10	S
Cell 111	22	3	B
Cell 112	22	3	B
Cell 113	22	3	B
Cell 114	62	10	A
Cell 115	62	10	A
Cell 116	62	4	A
Cell 117	90	3	S
Cell 118	90	10	A
Cell 119	90	3	B
Cell 120	90	3	A
Cell 121	91	3	S
Cell 128	91	4	S
Cell 129	91	3	B
Cell 130	91	10	B
Cell 133	49	10	B
Cell 134	49	3	B
Cell 135	49	3	A
Cell 136	50	3	B
Cell 137	50	3	B
Cell 138	50	3	B
Cell 139	50	10	A
Cell 140	76	3	B
Cell 141	76	10	B
Cell 229	76	10	S
Cell 230	76	3	A
Cell 131	68	3	A
Cell 132	62	10	A
Cell 224	62	10	B
Cell 225	62	10	B
Cell 122	27	3	S
Cell 231	67	10	B
Cell 123	27	3	B
Cell 232	67	3	S
Cell 233	67	10	B
Cell 124	27	3	A
Cell 234	67	10	B
Cell 125	27	3	S
Cell 126	27	10	S
Cell 127	27	3	B
Cell 235	63	10	S
Cell 236	63	10	B
Cell 237	63	10	A
Cell 227	63	3	B
Cell 228	63	3	B
Cell 209	63	3	B
Cell 164	22	10	A
Cell 165	22	3	B
Cell 166	22	3	A
Cell 167	22	3	S
Cell 168	22	3	B
Cell 169	22	3	B
Cell 170	22	3	B
Cell 244	98	3	B
Cell 238	98	10	A
Cell 239	98	10	B
Cell 240	98	10	A
Cell 241	98	3	A
Cell 242	72	3	B
Cell 243	72	10	B
Cell 210	72	2	B
Cell 211	72	3	B
Cell 212	72	3	B
Cell 213	72	3	A
Cell 214	72	10	A
Cell 226	72	3	B
Cell 171	187	3	A
Cell 172	187	3	A
Cell 173	187	3	S
Cell 174	187	10	A
Cell 175	187	10	A
Cell 215	187	3	A
Cell 216	187	3	B
Cell 217	187	3	B
Cell 218	187	3	B
Cell 219	187	10	B
Cell 220	187	10	S
Cell 221	187	3	B
Cell 222	187	3	B
Cell 223	187	3	B
Cell 245	86	3	B
Cell 246	86	3	A
Cell 247	86	3	B
Cell 248	86	3	B
Cell 142	15	3	A
Cell 143	15	3	B
Cell 144	15	3	B
Cell 145	15	10	A
Cell 146	15	10	B
Cell 147	15	10	S
Cell 148	15	3	B
Cell 149	15	3	B
Cell 150	15	10	B
Cell 151	15	10	A
Cell 152	16	3	A
Cell 153	16	3	B
Cell 154	16	10	A
Cell 155	16	10	B
Cell 156	16	10	A
Cell 157	16	3	S
Cell 158	16	3	A
Cell 159	16	10	B
Cell 160	16	10	A
Cell 161	16	10	B
Cell 162	16	10	B
Cell 163	16	3	A
Cell 176	40	3	A
Cell 177	40	3	A
Cell 178	40	10	B
Cell 179	40	3	B
Cell 180	40	3	B
Cell 181	40	3	B
Cell 182	40	10	A
Cell 183	40	10
Cell 184	40	3	B
Cell 185	40	3	B
Cell 186	40	3	B
Cell 194	112	10	B
Cell 195	112	10	A
Cell 196	112	10	B
Cell 197	112	3	B
Cell 198	112	10	B
Cell 199	112	10	A
Cell 200	112	10	A
Cell 201	90	10	S
Cell 202	90	10	A
Cell 203	90	10	B
Cell 204	90	3	A
Cell 205	90	3	B
Cell 206	90	3	S
Cell 207	90	10	A
Cell 208	90	10	B
Cell 187	4	10	A
Cell 188	4	10	B
Cell 189	4	3	B
Cell 190	4	10	S
Cell 191	4	3	A
Cell 192	4	10	A
Cell 193	4	3	S
Cell 249	47	3	B
Cell 250	47	3	B
Cell 251	47	10	S
Cell 252	47	10	B
Cell 253	47	10	B
Cell 254	47	10	S
Cell 255	47	3	B
Cell 256	47	10	S
Cell 257	47	10	B
Cell 258	47	10	S
Cell 259	24	10	S
Cell 260	24	10	A
Cell 261	24	10	A
Cell 262	24	10	S
Cell 263	24	10
Cell 264	24	10	B
Cell 265	24	10	B
Cell 266	24	10	B
Cell 267	24	10	A
Cell 268	24	3	A
Cell 269	24	3	A
Cell 270	24	10	A
Cell 271	24	1	B
Cell 272	37	10	S
Cell 273	37	10	S
Cell 274	37	3	A
Cell 275	37	3	B
Cell 276	37	3	B
Cell 277	37	10	S
Cell 278	38	10	A
Cell 279	38	10	A
Cell 280	38	3	B
Cell 281	38	2	A
Cell 282	38	3	A
Cell 283	38	3	B
Cell 284	38	10	S
Cell 285	38	10	S
Cell 286	38	9	A
Cell 289	38	10	B
Cell 290	38	10	S
Cell 291	9	3	S
Cell 292	9	3	A
Cell 293	9	3	B
Cell 294	9	3	B
Cell 295	9	3	B
Cell 296	9	3	B
Cell 297	9	3	S
Cell 298	9	3	A
Cell 299	9	3	S
Cell 300	9	3	B
Cell 301	9	3	B
Cell 302	9	3	B
Cell 303	9	10	S
Cell 304	9	10	B
Cell 305	9	10	A
Cell 306	9	10	B
Cell 307	9	3	B
Cell 308	102	10	S
Cell 309	102	3	A
Cell 310	102	10	S
Cell 311	102	10	B
Cell 312	102	3	B
Cell 287	102	3	S
Cell 288	102	10	A
Cell 11	8	9	B
Cell 12	8	9	A
Cell 13	8	10	A
Cell 66	8	6	B
Cell 67	8	10	A
Cell 14	10	3	B
Cell 16	10	3	B
Cell 15	10	7	S
Cell 68	14	3	S
Cell 69	14	6	A
Cell 70	14	3	S
Cell 71	14	#NULL!
Cell 21	14	#NULL!	B
Cell 22	14	3	A
Cell 23	14	#NULL!	B
Cell 25	154	8
Cell 26	154	3	A
Cell 28	62	9	B
Cell 29	62	8	A
Cell 30	62	3	B
Cell 31	64	#NULL!	B
Cell 32	64	5	B
Cell 33	64	10	A
Cell 34	64	8	B
Cell 17	71	6	A
Cell 19	71	7	A
Cell 20	71	9	A
Cell 36	72	9	B
Cell 37	72	6	A
Cell 38	72	4	B
Cell 39	72	8	B
Cell 40	72	10	S
Cell 48	72	9	A
Cell 49	72	9	S
Cell 50	74	10	A
Cell 51	74	7	S
Cell 52	74	3	B
Cell 53	74	10	A
Cell 54	74	6	B
Cell 41	7	10	B
Cell 42	7	10	B
Cell 43	7	10	B
Cell 44	7	9	B
Cell 45	7	8	A
Cell 46	8	9	A
Cell 7	42	10	B
