# Supplementary material for: Differential spatiotemporal development of Purkinje cell populations and cerebellum-dependent sensorimotor behaviors
Source: eLife. 2021 May 11;10:e63668. doi: 10.7554/eLife.63668 (PMC8195607; doi:10.7554/eLife.63668)
Supplement: Figure 3—source data 1. [file elife-63668-fig3-data1.xlsx]

## Sheet: Sheet1
Lobule	Age	PC ID	15 µm	20 µm	25 µm	30 µm	35 µm	40 µm	45 µm	50 µm	55 µm	60 µm	65 µm	70 µm	75 µm	80 µm	85 µm	90 µm	95 µm	100 µm	105 µm	110 µm	115 µm	120 µm	125 µm	130 µm	135 µm	140 µm	145 µm	150 µm	155 µm	160 µm	165 µm	170 µm	175 µm	180 µm	185 µm	190 µm	195 µm	200 µm	205 µm	210 µm	215 µm	220 µm	225 µm	230 µm	235 µm	240 µm	245 µm
I-III	P4	155.1-4	15	7	4	3	1	2	0	0	0	0	0	0	0	0	0	0	0	0	0	0	0	0	0	0	0	0	0	0	0	0	0	0	0	0	0	0	0	0	0	0	0	0	0	0	0	0	0
I-III	P4	155.2-1	7	17	14	6	1	1	0	0	0	0	0	0	0	0	0	0	0	0	0	0	0	0	0	0	0	0	0	0	0	0	0	0	0	0	0	0	0	0	0	0	0	0	0	0	0	0	0
I-III	P4	180.1-3	17	7	1	0	0	0	0	0	0	0	0	0	0	0	0	0	0	0	0	0	0	0	0	0	0	0	0	0	0	0	0	0	0	0	0	0	0	0	0	0	0	0	0	0	0	0	0
I-III	P4	180.2-2	7	6	2	2	0	0	0	0	0	0	0	0	0	0	0	0	0	0	0	0	0	0	0	0	0	0	0	0	0	0	0	0	0	0	0	0	0	0	0	0	0	0	0	0	0	0	0
I-III	P4	180.3-2	1	10	12	9	3	2	1	0	0	0	0	0	0	0	0	0	0	0	0	0	0	0	0	0	0	0	0	0	0	0	0	0	0	0	0	0	0	0	0	0	0	0	0	0	0	0	0
I-III	P4	224.4_lobiii	15	5	2	2	0	0	0	0	0	0	0	0	0	0	0	0	0	0	0	0	0	0	0	0	0	0	0	0	0	0	0	0	0	0	0	0	0	0	0	0	0	0	0	0	0	0	0
I-III	P4	224.1_lobiii	9	7	6	4	2	2	0	0	0	0	0	0	0	0	0	0	0	0	0	0	0	0	0	0	0	0	0	0	0	0	0	0	0	0	0	0	0	0	0	0	0	0	0	0	0	0	0
I-III	P5	225.4_lobiii1	5	1	0	0	0	0	0	0	0	0	0	0	0	0	0	0	0	0	0	0	0	0	0	0	0	0	0	0	0	0	0	0	0	0	0	0	0	0	0	0	0	0	0	0	0	0	0
I-III	P5	225.4_lobiii2	7	7	3	1	0	0	0	0	0	0	0	0	0	0	0	0	0	0	0	0	0	0	0	0	0	0	0	0	0	0	0	0	0	0	0	0	0	0	0	0	0	0	0	0	0	0	0
IX-X	P4	155.1-1	1	10	6	12	15	8	3	1	0	0	0	0	0	0	0	0	0	0	0	0	0	0	0	0	0	0	0	0	0	0	0	0	0	0	0	0	0	0	0	0	0	0	0	0	0	0	0
IX-X	P4	155.1-2	6	10	18	11	6	1	0	0	0	0	0	0	0	0	0	0	0	0	0	0	0	0	0	0	0	0	0	0	0	0	0	0	0	0	0	0	0	0	0	0	0	0	0	0	0	0	0
IX-X	P4	180.1-2	3	1	1	1	1	2	5	7	6	6	6	6	4	2	0	0	0	0	0	0	0	0	0	0	0	0	0	0	0	0	0	0	0	0	0	0	0	0	0	0	0	0	0	0	0	0	0
IX-X	P4	180.2-1	3	15	15	20	16	10	7	0	0	0	0	0	0	0	0	0	0	0	0	0	0	0	0	0	0	0	0	0	0	0	0	0	0	0	0	0	0	0	0	0	0	0	0	0	0	0	0
IX-X	P4	180.3-1	1	7	7	11	13	13	15	18	12	4	0	0	0	0	0	0	0	0	0	0	0	0	0	0	0	0	0	0	0	0	0	0	0	0	0	0	0	0	0	0	0	0	0	0	0	0	0
IX-X	P3	220.2_lobx	3	5	2	1	0	0	0	0	0	0	0	0	0	0	0	0	0	0	0	0	0	0	0	0	0	0	0	0	0	0	0	0	0	0	0	0	0	0	0	0	0	0	0	0	0	0	0
IX-X	P4	224.3_lobx	8	3	3	1	0	0	0	0	0	0	0	0	0	0	0	0	0	0	0	0	0	0	0	0	0	0	0	0	0	0	0	0	0	0	0	0	0	0	0	0	0	0	0	0	0	0	0
IX-X	P4	224.4_lobx	4	3	3	1	1	0	0	0	0	0	0	0	0	0	0	0	0	0	0	0	0	0	0	0	0	0	0	0	0	0	0	0	0	0	0	0	0	0	0	0	0	0	0	0	0	0	0
IX-X	P4	224.2_lobx	2	3	1	1	0	0	0	0	0	0	0	0	0	0	0	0	0	0	0	0	0	0	0	0	0	0	0	0	0	0	0	0	0	0	0	0	0	0	0	0	0	0	0	0	0	0	0
IX-X	P5	225.1_lobx1	6	8	6	10	6	4	5	4	1	3	2	3	1	1	0	0	0	0	0	0	0	0	0	0	0	0	0	0	0	0	0	0	0	0	0	0	0	0	0	0	0	0	0	0	0	0	0
IX-X	P5	225.1_lobx2	5	5	1	1	0	0	0	0	0	0	0	0	0	0	0	0	0	0	0	0	0	0	0	0	0	0	0	0	0	0	0	0	0	0	0	0	0	0	0	0	0	0	0	0	0	0	0
IX-X	P5	225.5_lobx	9	10	6	5	8	4	4	3	0	0	0	0	0	0	0	0	0	0	0	0	0	0	0	0	0	0	0	0	0	0	0	0	0	0	0	0	0	0	0	0	0	0	0	0	0	0	0
I-III	P8	80.2-4	5	4	1	0	0	0	0	0	0	0	0	0	0	0	0	0	0	0	0	0	0	0	0	0	0	0	0	0	0	0	0	0	0	0	0	0	0	0	0	0	0	0	0	0	0	0	0
I-III	P10	81.3-3	9	10	12	4	8	12	19	12	6	1	0	0	0	0	0	0	0	0	0	0	0	0	0	0	0	0	0	0	0	0	0	0	0	0	0	0	0	0	0	0	0	0	0	0	0	0	0
I-III	P10	81.3-4	2	7	6	11	14	12	13	15	14	14	15	10	10	6	4	4	5	0	0	0	0	0	0	0	0	0	0	0	0	0	0	0	0	0	0	0	0	0	0	0	0	0	0	0	0	0	0
I-III	P10	81.4-5	5	8	11	4	11	14	5	11	6	10	2	2	0	0	0	0	0	0	0	0	0	0	0	0	0	0	0	0	0	0	0	0	0	0	0	0	0	0	0	0	0	0	0	0	0	0	0
I-III	P7	150.1-1	1	5	2	7	8	8	6	8	7	7	7	14	5	0	0	0	0	0	0	0	0	0	0	0	0	0	0	0	0	0	0	0	0	0	0	0	0	0	0	0	0	0	0	0	0	0	0
I-III	P9	152.1-1	1	1	2	5	9	10	14	10	16	15	13	10	16	13	18	21	11	3	1	0	0	0	0	0	0	0	0	0	0	0	0	0	0	0	0	0	0	0	0	0	0	0	0	0	0	0	0
I-III	P9	152.1-2	4	4	6	4	6	10	9	13	11	14	11	11	9	4	6	7	5	4	3	2	1	1	0	0	0	0	0	0	0	0	0	0	0	0	0	0	0	0	0	0	0	0	0	0	0	0	0
I-III	P9	202.1-1	2	2	7	8	9	12	11	15	12	16	16	20	10	4	6	5	6	1	0	0	0	0	0	0	0	0	0	0	0	0	0	0	0	0	0	0	0	0	0	0	0	0	0	0	0	0	0
I-III	P9	202.1-2	1	1	1	1	6	6	9	7	11	8	6	8	5	2	3	0	0	0	0	0	0	0	0	0	0	0	0	0	0	0	0	0	0	0	0	0	0	0	0	0	0	0	0	0	0	0	0
I-III	P9	202.1-3	5	8	4	7	8	14	4	1	0	0	0	0	0	0	0	0	0	0	0	0	0	0	0	0	0	0	0	0	0	0	0	0	0	0	0	0	0	0	0	0	0	0	0	0	0	0	0
I-III	P9	202.2-1	1	4	7	9	7	7	11	12	15	17	18	16	10	12	7	9	6	2	0	0	0	0	0	0	0	0	0	0	0	0	0	0	0	0	0	0	0	0	0	0	0	0	0	0	0	0	0
I-III	P9	202.2-2	1	2	3	6	4	3	3	3	7	6	6	7	5	4	5	1	0	0	0	0	0	0	0	0	0	0	0	0	0	0	0	0	0	0	0	0	0	0	0	0	0	0	0	0	0	0	0
I-III	P9	202.2-3	2	3	3	4	5	5	6	6	9	10	10	9	8	12	18	8	5	2	0	0	0	0	0	0	0	0	0	0	0	0	0	0	0	0	0	0	0	0	0	0	0	0	0	0	0	0	0
I-III	P9	202.3-1	2	3	6	12	10	9	9	6	3	4	7	1	0	0	0	0	0	0	0	0	0	0	0	0	0	0	0	0	0	0	0	0	0	0	0	0	0	0	0	0	0	0	0	0	0	0	0
I-III	P9	202.3-2	1	2	2	3	5	9	9	8	1	0	0	0	0	0	0	0	0	0	0	0	0	0	0	0	0	0	0	0	0	0	0	0	0	0	0	0	0	0	0	0	0	0	0	0	0	0	0
I-III	P9	202.4-1	2	3	6	4	9	10	8	12	12	9	13	7	4	4	6	4	1	0	0	0	0	0	0	0	0	0	0	0	0	0	0	0	0	0	0	0	0	0	0	0	0	0	0	0	0	0	0
I-III	P9	202.4-2	1	4	4	3	5	5	7	7	7	5	14	8	7	0	0	0	0	0	0	0	0	0	0	0	0	0	0	0	0	0	0	0	0	0	0	0	0	0	0	0	0	0	0	0	0	0	0
I-III	P9	202.4-3	2	2	4	4	1	7	8	8	11	5	2	0	0	0	0	0	0	0	0	0	0	0	0	0	0	0	0	0	0	0	0	0	0	0	0	0	0	0	0	0	0	0	0	0	0	0	0
I-III	P9	202.4-4	2	7	11	6	6	8	8	12	14	11	12	5	2	0	0	0	0	0	0	0	0	0	0	0	0	0	0	0	0	0	0	0	0	0	0	0	0	0	0	0	0	0	0	0	0	0	0
I-III	P9	202.5-5	2	2	3	3	5	4	5	3	5	5	9	13	12	12	0	0	0	0	0	0	0	0	0	0	0	0	0	0	0	0	0	0	0	0	0	0	0	0	0	0	0	0	0	0	0	0	0
I-III	P6	211.2	2	2	2	4	3	2	0	0	0	0	0	0	0	0	0	0	0	0	0	0	0	0	0	0	0	0	0	0	0	0	0	0	0	0	0	0	0	0	0	0	0	0	0	0	0	0	0
I-III	P6	211.3	9	2	2	0	0	0	0	0	0	0	0	0	0	0	0	0	0	0	0	0	0	0	0	0	0	0	0	0	0	0	0	0	0	0	0	0	0	0	0	0	0	0	0	0	0	0	0
I-III	P6	211.4	11	6	3	1	0	0	0	0	0	0	0	0	0	0	0	0	0	0	0	0	0	0	0	0	0	0	0	0	0	0	0	0	0	0	0	0	0	0	0	0	0	0	0	0	0	0	0
I-III	P8	212.1 P8_lobiii1	4	6	6	9	9	15	9	9	2	0	0	0	0	0	0	0	0	0	0	0	0	0	0	0	0	0	0	0	0	0	0	0	0	0	0	0	0	0	0	0	0	0	0	0	0	0	0
I-III	P8	212.1 P8_lobiii2	1	1	2	4	6	6	7	5	6	10	8	8	7	3	0	0	0	0	0	0	0	0	0	0	0	0	0	0	0	0	0	0	0	0	0	0	0	0	0	0	0	0	0	0	0	0	0
I-III	P8	212.1 P8_lobiii3	1	2	4	4	6	9	10	11	6	0	0	0	0	0	0	0	0	0	0	0	0	0	0	0	0	0	0	0	0	0	0	0	0	0	0	0	0	0	0	0	0	0	0	0	0	0	0
I-III	P11	229.2_P11_lobii	3	3	5	7	10	16	6	6	8	5	7	3	6	4	4	5	3	1	1	0	0	0	0	0	0	0	0	0	0	0	0	0	0	0	0	0	0	0	0	0	0	0	0	0	0	0	0
I-III	P11	239.1_P11_lobiii	3	6	9	7	11	9	11	10	10	9	12	8	4	4	2	0	0	0	0	0	0	0	0	0	0	0	0	0	0	0	0	0	0	0	0	0	0	0	0	0	0	0	0	0	0	0	0
IX-X	P8	80.1-1	5	1	5	7	11	13	5	0	0	0	0	0	0	0	0	0	0	0	0	0	0	0	0	0	0	0	0	0	0	0	0	0	0	0	0	0	0	0	0	0	0	0	0	0	0	0	0
IX-X	P8	80.1-2	4	3	7	11	7	7	6	2	0	0	0	0	0	0	0	0	0	0	0	0	0	0	0	0	0	0	0	0	0	0	0	0	0	0	0	0	0	0	0	0	0	0	0	0	0	0	0
IX-X	P8	80.1-3	7	7	5	4	1	0	0	0	0	0	0	0	0	0	0	0	0	0	0	0	0	0	0	0	0	0	0	0	0	0	0	0	0	0	0	0	0	0	0	0	0	0	0	0	0	0	0
IX-X	P8	80.2-5	5	11	9	1	4	11	7	0	0	0	0	0	0	0	0	0	0	0	0	0	0	0	0	0	0	0	0	0	0	0	0	0	0	0	0	0	0	0	0	0	0	0	0	0	0	0	0
IX-X	P7	91.1-1	2	4	5	4	2	0	0	0	0	0	0	0	0	0	0	0	0	0	0	0	0	0	0	0	0	0	0	0	0	0	0	0	0	0	0	0	0	0	0	0	0	0	0	0	0	0	0
IX-X	P7	91.1-2	1	1	3	3	3	2	3	1	4	4	3	3	0	0	0	0	0	0	0	0	0	0	0	0	0	0	0	0	0	0	0	0	0	0	0	0	0	0	0	0	0	0	0	0	0	0	0
IX-X	P7	91.2-2	1	4	5	4	4	4	9	7	7	7	2	2	0	0	0	0	0	0	0	0	0	0	0	0	0	0	0	0	0	0	0	0	0	0	0	0	0	0	0	0	0	0	0	0	0	0	0
IX-X	P7	91.2-3	8	9	4	8	2	0	0	0	0	0	0	0	0	0	0	0	0	0	0	0	0	0	0	0	0	0	0	0	0	0	0	0	0	0	0	0	0	0	0	0	0	0	0	0	0	0	0
IX-X	P7	91.2-4	11	12	15	14	5	2	0	0	0	0	0	0	0	0	0	0	0	0	0	0	0	0	0	0	0	0	0	0	0	0	0	0	0	0	0	0	0	0	0	0	0	0	0	0	0	0	0
IX-X	P8	93.1-3	7	3	9	5	5	8	4	5	5	5	4	4	1	1	0	0	0	0	0	0	0	0	0	0	0	0	0	0	0	0	0	0	0	0	0	0	0	0	0	0	0	0	0	0	0	0	0
IX-X	P7	150.1-2	1	4	3	3	8	9	3	3	2	1	1	0	0	0	0	0	0	0	0	0	0	0	0	0	0	0	0	0	0	0	0	0	0	0	0	0	0	0	0	0	0	0	0	0	0	0	0
IX-X	P7	150.1-3	1	2	2	1	2	3	4	3	4	3	6	3	0	0	0	0	0	0	0	0	0	0	0	0	0	0	0	0	0	0	0	0	0	0	0	0	0	0	0	0	0	0	0	0	0	0	0
IX-X	P7	150.2-1	1	1	3	3	5	3	0	0	0	0	0	0	0	0	0	0	0	0	0	0	0	0	0	0	0	0	0	0	0	0	0	0	0	0	0	0	0	0	0	0	0	0	0	0	0	0	0
IX-X	P7	150.2-2	1	1	1	1	1	2	4	7	7	3	0	0	0	0	0	0	0	0	0	0	0	0	0	0	0	0	0	0	0	0	0	0	0	0	0	0	0	0	0	0	0	0	0	0	0	0	0
IX-X	P7	150.2-3	1	2	2	2	5	3	6	5	6	6	4	4	1	0	0	0	0	0	0	0	0	0	0	0	0	0	0	0	0	0	0	0	0	0	0	0	0	0	0	0	0	0	0	0	0	0	0
IX-X	P7	150.5-1	1	4	8	11	2	0	0	0	0	0	0	0	0	0	0	0	0	0	0	0	0	0	0	0	0	0	0	0	0	0	0	0	0	0	0	0	0	0	0	0	0	0	0	0	0	0	0
IX-X	P7	150.5-2	1	5	5	4	3	2	0	0	0	0	0	0	0	0	0	0	0	0	0	0	0	0	0	0	0	0	0	0	0	0	0	0	0	0	0	0	0	0	0	0	0	0	0	0	0	0	0
IX-X	P7	150.5-3	2	1	2	2	3	3	6	0	0	0	0	0	0	0	0	0	0	0	0	0	0	0	0	0	0	0	0	0	0	0	0	0	0	0	0	0	0	0	0	0	0	0	0	0	0	0	0
IX-X	P8	151.1-1	2	1	2	3	4	5	5	6	5	7	9	6	9	7	8	4	3	0	0	0	0	0	0	0	0	0	0	0	0	0	0	0	0	0	0	0	0	0	0	0	0	0	0	0	0	0	0
IX-X	P8	151.1-2	1	1	1	4	3	5	7	8	8	10	14	13	6	11	12	6	8	4	7	5	3	2	4	2	1	0	0	0	0	0	0	0	0	0	0	0	0	0	0	0	0	0	0	0	0	0	0
IX-X	P8	151.2-1	5	5	5	7	11	11	13	13	14	13	7	6	6	2	2	5	1	2	1	0	0	0	0	0	0	0	0	0	0	0	0	0	0	0	0	0	0	0	0	0	0	0	0	0	0	0	0
IX-X	P8	151.3-1	4	4	4	8	11	12	9	10	12	8	12	9	7	8	3	0	0	0	0	0	0	0	0	0	0	0	0	0	0	0	0	0	0	0	0	0	0	0	0	0	0	0	0	0	0	0	0
IX-X	P8	151.4-1	1	1	1	2	3	4	4	4	5	7	7	9	4	7	6	4	2	4	1	1	1	0	0	0	0	0	0	0	0	0	0	0	0	0	0	0	0	0	0	0	0	0	0	0	0	0	0
IX-X	P8	151.4-2	4	2	3	4	3	2	5	5	5	9	7	9	6	6	8	8	3	0	0	0	0	0	0	0	0	0	0	0	0	0	0	0	0	0	0	0	0	0	0	0	0	0	0	0	0	0	0
IX-X	P9	152.2-2	1	4	4	12	8	2	5	2	4	4	3	5	3	2	4	5	2	2	0	0	0	0	0	0	0	0	0	0	0	0	0	0	0	0	0	0	0	0	0	0	0	0	0	0	0	0	0
IX-X	P9	152.2-3	1	9	13	15	8	9	7	6	13	5	8	6	4	0	0	0	0	0	0	0	0	0	0	0	0	0	0	0	0	0	0	0	0	0	0	0	0	0	0	0	0	0	0	0	0	0	0
IX-X	P9	152.3-1	1	2	1	1	3	4	5	8	7	18	17	8	12	7	10	6	13	7	6	12	5	7	4	2	3	2	1	0	0	0	0	0	0	0	0	0	0	0	0	0	0	0	0	0	0	0	0
IX-X	P9	152.4-1	2	6	10	6	6	10	12	12	7	6	7	4	7	1	0	0	0	0	0	0	0	0	0	0	0	0	0	0	0	0	0	0	0	0	0	0	0	0	0	0	0	0	0	0	0	0	0
IX-X	P9	202.5-1	1	3	4	5	3	2	2	2	4	7	4	3	5	2	1	0	0	0	0	0	0	0	0	0	0	0	0	0	0	0	0	0	0	0	0	0	0	0	0	0	0	0	0	0	0	0	0
IX-X	P9	202.5-2	1	1	1	1	2	3	3	3	2	5	2	0	0	0	0	0	0	0	0	0	0	0	0	0	0	0	0	0	0	0	0	0	0	0	0	0	0	0	0	0	0	0	0	0	0	0	0
IX-X	P9	202.5-3	1	6	4	5	7	8	6	3	2	0	0	0	0	0	0	0	0	0	0	0	0	0	0	0	0	0	0	0	0	0	0	0	0	0	0	0	0	0	0	0	0	0	0	0	0	0	0
IX-X	P9	202.5-4	2	2	4	5	3	6	5	8	9	10	7	5	8	6	5	3	8	4	3	0	0	0	0	0	0	0	0	0	0	0	0	0	0	0	0	0	0	0	0	0	0	0	0	0	0	0	0
IX-X	P6	211.2 P6_lobx	1	3	1	2	3	5	1	5	1	2	4	2	5	0	0	0	0	0	0	0	0	0	0	0	0	0	0	0	0	0	0	0	0	0	0	0	0	0	0	0	0	0	0	0	0	0	0
IX-X	P6	211.4 P6_lobx1	1	7	3	0	0	0	0	0	0	0	0	0	0	0	0	0	0	0	0	0	0	0	0	0	0	0	0	0	0	0	0	0	0	0	0	0	0	0	0	0	0	0	0	0	0	0	0
IX-X	P6	211.4 P6_lobx2	2	5	4	3	2	0	0	0	0	0	0	0	0	0	0	0	0	0	0	0	0	0	0	0	0	0	0	0	0	0	0	0	0	0	0	0	0	0	0	0	0	0	0	0	0	0	0
IX-X	P11	229.1_P11_lobx	1	1	1	2	8	6	8	4	2	4	3	3	5	5	4	9	8	6	5	5	7	7	5	3	3	1	0	0	0	0	0	0	0	0	0	0	0	0	0	0	0	0	0	0	0	0	0
IX-X	P11	239.1_P11_lobx	3	8	5	6	9	13	14	17	15	13	16	12	3	2	1	0	0	0	0	0	0	0	0	0	0	0	0	0	0	0	0	0	0	0	0	0	0	0	0	0	0	0	0	0	0	0	0
IX-X	P11	239.2_P11_lobx	5	8	8	10	10	17	10	14	14	17	10	13	14	7	1	0	0	0	0	0	0	0	0	0	0	0	0	0	0	0	0	0	0	0	0	0	0	0	0	0	0	0	0	0	0	0	0
I-III	P14	82.1-1	2	4	7	8	6	10	6	12	10	10	15	17	15	13	13	19	18	18	13	10	9	6	6	5	3	0	0	0	0	0	0	0	0	0	0	0	0	0	0	0	0	0	0	0	0	0	0
I-III	P14	82.3-3	7	5	6	9	7	6	8	17	19	10	17	17	18	20	20	23	15	13	22	15	5	1	0	0	0	0	0	0	0	0	0	0	0	0	0	0	0	0	0	0	0	0	0	0	0	0	0
I-III	P14	82.4-5	5	15	13	19	16	16	17	25	30	27	35	31	15	27	29	35	32	34	31	37	29	18	19	21	10	10	14	18	6	5	0	0	0	0	0	0	0	0	0	0	0	0	0	0	0	0	0
I-III	P14	82.5-7	3	8	6	11	9	12	17	13	12	16	15	19	17	22	14	11	13	11	12	14	15	14	15	6	1	0	0	0	0	0	0	0	0	0	0	0	0	0	0	0	0	0	0	0	0	0	0
I-III	P15	175.1-1	4	7	9	8	7	13	13	14	24	21	20	28	23	28	31	28	27	20	13	18	23	22	18	25	21	18	18	13	12	14	9	7	0	0	0	0	0	0	0	0	0	0	0	0	0	0	0
I-III	P15	175.1-2	2	5	5	7	10	11	14	12	14	16	22	20	17	21	14	21	22	24	19	17	14	12	3	1	1	0	0	0	0	0	0	0	0	0	0	0	0	0	0	0	0	0	0	0	0	0	0
I-III	P15	175.1-3	4	7	9	9	13	12	11	16	13	19	20	19	13	11	18	17	19	19	23	15	14	16	9	11	16	13	9	4	0	0	0	0	0	0	0	0	0	0	0	0	0	0	0	0	0	0	0
I-III	P15	175.2-1	1	1	5	8	9	15	14	9	14	15	19	26	20	22	19	22	14	11	11	10	7	4	6	2	0	0	0	0	0	0	0	0	0	0	0	0	0	0	0	0	0	0	0	0	0	0	0
I-III	P15	175.2-2	3	3	4	3	9	10	10	11	10	12	16	17	15	18	14	11	9	13	13	13	13	13	13	12	18	13	12	6	3	0	0	0	0	0	0	0	0	0	0	0	0	0	0	0	0	0	0
I-III	P16	176.1-2	3	4	10	11	9	11	15	11	16	16	18	20	19	19	27	23	22	24	29	24	28	19	22	17	17	17	8	9	5	6	5	2	0	0	0	0	0	0	0	0	0	0	0	0	0	0	0
I-III	P16	176.2-2	3	6	10	18	14	16	22	17	12	14	11	15	15	11	10	6	5	7	6	3	3	2	5	4	3	1	3	2	1	1	0	0	0	0	0	0	0	0	0	0	0	0	0	0	0	0	0
I-III	P16	176.2-3	4	5	6	8	9	12	10	13	14	15	14	22	14	13	12	5	3	3	0	0	0	0	0	0	0	0	0	0	0	0	0	0	0	0	0	0	0	0	0	0	0	0	0	0	0	0	0
I-III	P16	176.4-2	1	3	5	8	6	5	11	11	13	15	15	13	15	19	18	21	21	18	10	10	1	1	0	0	0	0	0	0	0	0	0	0	0	0	0	0	0	0	0	0	0	0	0	0	0	0	0
I-III	P15	214.1_lobiii	2	7	10	11	13	13	17	12	19	30	30	26	26	21	18	18	14	16	11	9	6	8	6	3	1	0	0	0	0	0	0	0	0	0	0	0	0	0	0	0	0	0	0	0	0	0	0
I-III	P15	214.2_lobiii	5	6	5	9	15	12	18	17	20	17	17	18	22	16	19	24	23	24	22	21	17	21	21	25	28	29	23	13	9	4	1	0	0	0	0	0	0	0	0	0	0	0	0	0	0	0	0
I-III	P17	221.1_lobiii1	6	11	12	14	16	16	18	16	16	10	7	9	8	5	6	5	6	3	1	0	0	0	0	0	0	0	0	0	0	0	0	0	0	0	0	0	0	0	0	0	0	0	0	0	0	0	0
I-III	P17	221.1_lobiii2	4	7	10	8	12	13	15	12	20	16	19	18	24	22	22	19	12	21	23	22	16	6	2	0	0	0	0	0	0	0	0	0	0	0	0	0	0	0	0	0	0	0	0	0	0	0	0
I-III	P17	221.2_lobii	4	9	7	7	6	10	10	11	13	11	8	8	10	7	5	7	6	5	6	4	5	1	0	0	0	0	0	0	0	0	0	0	0	0	0	0	0	0	0	0	0	0	0	0	0	0	0
IX-X	P15	175.1-4	4	5	9	9	10	10	19	14	20	14	23	24	24	26	23	22	18	16	15	19	18	18	11	10	5	4	1	0	0	0	0	0	0	0	0	0	0	0	0	0	0	0	0	0	0	0	0
IX-X	P15	175.1-5	3	9	8	14	12	15	11	16	24	19	21	19	14	15	15	14	10	11	13	6	9	7	2	2	0	0	0	0	0	0	0	0	0	0	0	0	0	0	0	0	0	0	0	0	0	0	0
IX-X	P15	175.1-6	5	5	6	4	10	10	14	14	17	11	18	24	15	16	18	15	16	16	14	17	11	8	4	2	0	0	0	0	0	0	0	0	0	0	0	0	0	0	0	0	0	0	0	0	0	0	0
IX-X	P15	175.2-3	2	4	3	4	11	9	14	10	10	16	16	13	15	13	18	20	23	24	19	19	17	12	14	10	5	8	4	1	0	0	0	0	0	0	0	0	0	0	0	0	0	0	0	0	0	0	0
IX-X	P15	175.2-4	2	2	4	3	6	6	12	8	13	13	16	18	14	16	19	22	22	24	23	19	22	17	16	13	2	3	2	0	0	0	0	0	0	0	0	0	0	0	0	0	0	0	0	0	0	0	0
IX-X	P16	176.1-4	1	2	4	7	9	6	8	7	12	16	14	22	9	11	12	7	9	14	12	9	13	16	13	14	17	18	14	13	6	6	4	1	0	0	0	0	0	0	0	0	0	0	0	0	0	0	0
IX-X	P16	176.2-1	3	3	6	9	12	13	9	11	10	12	14	16	15	17	21	17	19	14	8	13	13	7	4	4	4	3	1	0	0	0	0	0	0	0	0	0	0	0	0	0	0	0	0	0	0	0	0
IX-X	P16	176.3-1	2	3	4	5	7	10	8	10	15	10	13	18	20	21	21	26	25	24	20	22	16	16	5	7	3	3	0	0	0	0	0	0	0	0	0	0	0	0	0	0	0	0	0	0	0	0	0
IX-X	P16	176.3-2	1	1	1	4	4	7	9	6	9	8	9	11	17	10	14	8	11	11	7	1	3	1	0	0	0	0	0	0	0	0	0	0	0	0	0	0	0	0	0	0	0	0	0	0	0	0	0
IX-X	P16	176.3-3	1	5	6	7	8	6	9	12	17	13	14	8	13	9	12	17	16	19	17	11	15	9	5	5	7	5	0	0	0	0	0	0	0	0	0	0	0	0	0	0	0	0	0	0	0	0	0
IX-X	P16	176.4-1	1	2	3	3	6	5	6	10	10	12	17	16	17	22	22	19	18	20	15	12	11	12	14	9	6	8	9	6	6	6	4	1	0	0	0	0	0	0	0	0	0	0	0	0	0	0	0
IX-X	P15	214.1_lobx1	3	5	5	5	10	10	14	14	13	17	17	9	9	6	5	2	6	6	5	5	3	4	3	1	0	0	0	0	0	0	0	0	0	0	0	0	0	0	0	0	0	0	0	0	0	0	0
IX-X	P15	214.1_lobx2	1	3	8	7	13	15	19	18	13	20	18	16	16	22	17	12	11	10	7	7	2	1	2	0	0	0	0	0	0	0	0	0	0	0	0	0	0	0	0	0	0	0	0	0	0	0	0
IX-X	P15	214.3_lobx	1	1	5	6	12	9	15	13	19	20	20	21	19	14	13	11	12	11	12	13	11	11	12	10	11	9	4	1	0	0	0	0	0	0	0	0	0	0	0	0	0	0	0	0	0	0	0
I-III	P22	156.2-1	1	5	8	9	8	13	17	16	21	20	22	17	25	26	30	23	30	27	27	20	25	20	14	7	6	5	1	0	0	0	0	0	0	0	0	0	0	0	0	0	0	0	0	0	0	0	0
I-III	P22	156.2-2	5	5	11	13	18	12	17	21	29	30	24	25	30	18	18	17	15	17	11	18	15	12	8	9	9	4	4	0	0	0	0	0	0	0	0	0	0	0	0	0	0	0	0	0	0	0	0
I-III	P22	156.3-1	5	8	10	12	15	15	12	11	17	23	20	21	19	23	26	27	30	24	24	24	25	28	23	22	18	16	23	22	26	25	23	22	19	18	15	11	12	10	6	8	7	6	7	8	8	3	3
I-III	P22	169.2-1	1	2	7	7	15	20	13	11	11	13	15	13	15	12	13	14	20	12	11	17	20	19	21	20	21	22	20	22	22	18	19	21	23	24	19	18	17	20	12	11	7	5	6	2	2	2	0
I-III	P22	169.3-1	1	4	7	5	8	9	18	18	19	19	22	24	21	25	17	22	28	30	27	26	25	27	31	22	18	11	7	6	5	0	0	0	0	0	0	0	0	0	0	0	0	0	0	0	0	0	0
I-III	P22	169.4-1	3	1	3	2	3	5	8	10	12	19	10	13	16	16	12	16	16	17	20	15	13	17	18	13	13	15	10	8	11	12	10	14	10	11	11	10	15	11	7	5	8	11	8	4	4	3	3
I-III	P22	169.4-2	2	4	9	7	10	8	11	12	13	22	15	17	20	17	24	24	20	25	16	17	15	15	21	22	20	25	21	25	25	28	12	12	6	7	15	10	14	12	13	11	13	6	7	4	6	4	0
I-III	P22	169.4-3	2	5	4	6	8	10	10	14	16	17	16	15	21	16	19	8	10	12	13	15	20	18	16	23	23	21	20	17	21	24	19	27	22	24	16	19	20	15	14	8	9	5	5	4	3	1	0
I-III	P22	169.4-4	3	3	2	2	4	3	6	9	11	16	16	18	15	18	24	25	19	18	25	24	23	20	21	25	21	24	18	26	22	25	24	22	17	22	23	18	18	21	22	23	19	21	18	22	14	4	1
I-III	P24	194.4-1	2	3	6	8	6	10	13	11	16	13	22	23	16	23	22	26	23	22	25	24	20	19	16	16	18	17	16	18	14	16	10	5	4	3	6	5	5	2	0	0	0	0	0	0	0	0	0
I-III	P24	194.4-2	6	4	7	12	7	14	20	21	26	25	27	30	22	36	37	39	35	27	17	12	11	5	6	2	4	2	1	0	0	0	0	0	0	0	0	0	0	0	0	0	0	0	0	0	0	0	0
I-III	P24	194.5-2	1	2	5	6	11	10	12	15	15	13	18	13	16	15	17	16	22	21	12	11	11	8	8	10	8	6	5	6	5	4	5	1	0	0	0	0	0	0	0	0	0	0	0	0	0	0	0
I-III	P22	215.2_lobiii	3	6	6	3	7	8	10	10	11	12	13	12	15	17	15	16	17	19	16	19	19	25	33	28	27	12	12	8	10	10	9	6	1	0	0	0	0	0	0	0	0	0	0	0	0	0	0
I-III	P22	215.3_lobi	4	7	9	7	11	18	17	18	23	22	18	19	23	17	15	13	12	11	10	9	6	4	0	0	0	0	0	0	0	0	0	0	0	0	0	0	0	0	0	0	0	0	0	0	0	0	0
IX-X	P19	116.1-1	2	2	1	6	5	10	12	10	11	11	14	13	15	13	12	0	0	0	0	0	0	0	0	0	0	0	0	0	0	0	0	0	0	0	0	0	0	0	0	0	0	0	0	0	0	0	0
IX-X	P19	117.1-12	1	1	1	1	2	2	6	7	9	10	13	16	11	15	19	20	21	14	17	18	22	23	18	13	13	8	9	7	3	0	0	0	0	0	0	0	0	0	0	0	0	0	0	0	0	0	0
IX-X	P22	156.1-1	1	3	6	5	12	2	8	9	8	10	9	12	11	20	13	15	15	14	15	10	13	11	10	10	7	6	4	7	4	3	1	0	0	0	0	0	0	0	0	0	0	0	0	0	0	0	0
IX-X	P22	156.1-2	2	2	6	6	7	9	15	20	19	21	24	17	18	24	21	21	14	17	13	16	20	15	14	16	19	22	17	16	12	11	5	6	2	0	0	0	0	0	0	0	0	0	0	0	0	0	0
IX-X	P22	169.1-1	1	1	2	1	4	5	8	11	13	5	11	13	16	9	12	8	11	12	14	19	19	17	16	22	19	19	17	17	14	16	15	11	11	12	12	10	7	7	3	3	1	1	1	0	0	0	0
IX-X	P24	194.1-1	2	4	9	6	9	11	11	15	10	10	10	10	8	17	14	16	14	17	14	16	15	15	16	17	18	19	16	13	13	11	11	12	11	6	3	1	0	0	0	0	0	0	0	0	0	0	0
IX-X	P24	194.2-2	1	1	1	1	1	2	5	4	4	5	6	10	5	11	6	10	8	12	8	11	13	15	15	12	14	15	15	13	10	11	12	7	4	4	3	2	4	1	0	0	0	0	0	0	0	0	0
IX-X	P24	194.2-3	1	1	3	3	4	5	10	11	11	11	16	14	16	16	19	18	20	19	18	22	15	14	18	18	13	7	4	5	2	0	0	0	0	0	0	0	0	0	0	0	0	0	0	0	0	0	0
IX-X	P24	194.2-4	2	4	5	9	13	16	15	17	18	15	18	21	24	17	20	19	27	21	22	20	14	14	12	8	6	4	1	0	0	0	0	0	0	0	0	0	0	0	0	0	0	0	0	0	0	0	0
IX-X	P24	194.3-1	1	1	2	2	3	1	4	6	5	8	5	8	8	10	8	12	12	13	10	5	4	6	4	8	4	5	3	2	1	0	0	0	0	0	0	0	0	0	0	0	0	0	0	0	0	0	0
IX-X	P24	194.3-2	1	3	4	6	5	8	8	10	10	7	7	7	7	9	13	11	10	8	12	9	14	9	15	18	14	16	15	9	0	0	0	0	0	0	0	0	0	0	0	0	0	0	0	0	0	0	0
IX-X	P24	194.5-1	1	1	1	1	1	4	3	7	7	10	4	7	9	10	13	13	13	16	16	19	20	7	7	14	9	11	8	5	5	4	3	1	0	0	0	0	0	0	0	0	0	0	0	0	0	0	0
IX-X	P22	215.1_lobx	1	1	3	7	7	6	6	6	12	6	9	15	16	20	10	7	5	5	4	1	0	0	0	0	0	0	0	0	0	0	0	0	0	0	0	0	0	0	0	0	0	0	0	0	0	0	0
IX-X	P22	215.3_lobx	1	1	2	4	9	10	13	11	8	16	13	21	18	15	14	8	10	0	0	0	0	0	0	0	0	0	0	0	0	0	0	0	0	0	0	0	0	0	0	0	0	0	0	0	0	0	0
IX-X	P22	215.5_lobx	3	3	8	7	11	13	12	21	10	11	16	17	16	20	19	15	21	20	23	22	15	21	23	20	19	17	16	11	7	4	6	8	4	4	4	3	5	5	7	4	2	4	7	2	3	0	0
I-III	P48	131.2	2	6	6	9	11	12	14	15	14	19	23	24	22	29	31	29	30	25	23	22	19	22	25	25	24	22	24	23	22	20	20	20	22	20	14	12	10	10	2	1	0	0	0	0	0	0	0
I-III	P49	132.3-3	5	10	8	16	12	16	17	19	17	23	22	22	24	24	30	36	35	31	27	30	18	7	1	0	0	0	0	0	0	0	0	0	0	0	0	0	0	0	0	0	0	0	0	0	0	0	0
I-III	P49	141.2	1	4	4	10	9	10	11	18	18	21	24	25	23	23	26	20	27	18	13	16	15	18	25	24	21	27	31	15	18	13	12	10	12	11	14	6	5	6	5	0	0	0	0	0	0	0	0
I-III	P49	141.5	1	1	6	2	5	4	3	6	7	4	9	12	10	10	9	11	13	8	8	9	5	15	13	7	15	8	16	14	18	12	12	11	8	4	1	1	1	1	0	0	0	0	0	0	0	0	0
I-III	P49	162.2-1	1	1	1	1	2	1	3	3	8	11	14	18	20	24	23	27	23	27	28	28	29	25	28	30	29	31	33	34	25	29	33	37	36	26	18	12	10	4	4	0	0	0	0	0	0	0	0
I-III	P49	162.3-1	4	6	6	8	10	8	12	9	16	16	20	17	24	22	22	25	21	19	11	5	5	5	5	0	0	0	0	0	0	0	0	0	0	0	0	0	0	0	0	0	0	0	0	0	0	0	0
I-III	P50	163.1-1	3	2	5	6	7	7	12	13	14	15	20	15	18	15	24	30	22	27	23	26	22	22	18	15	16	15	9	9	9	8	8	7	8	9	9	9	12	13	8	8	7	8	11	6	11	8	8
I-III	P50	163.2-1	3	3	5	9	10	10	13	10	11	12	14	10	10	14	9	13	15	13	15	19	17	17	15	10	20	17	20	19	20	21	26	19	18	20	20	20	19	22	20	17	19	17	21	21	22	21	25
I-III	P50	163.3-1	3	4	2	5	10	6	5	9	14	12	13	19	18	16	18	15	16	22	20	25	25	28	24	29	30	31	32	38	35	28	30	27	22	26	22	20	16	11	3	1	0	0	0	0	0	0	0
I-III	P40	177.1-1	2	5	6	9	9	18	14	17	21	19	19	20	19	23	20	30	29	30	34	33	41	42	38	37	39	36	35	28	24	15	9	7	3	2	1	0	0	0	0	0	0	0	0	0	0	0	0
I-III	P40	177.1-2	2	4	4	5	8	13	14	9	11	13	13	13	20	16	21	18	22	19	23	21	18	22	23	22	24	20	20	27	29	25	24	28	26	33	32	39	28	30	28	24	17	11	17	13	15	8	4
I-III	P40	177.2-1	5	8	10	8	10	9	9	11	18	13	13	17	15	26	32	26	20	20	26	21	27	17	19	20	27	20	24	24	18	16	15	9	13	6	0	0	0	0	0	0	0	0	0	0	0	0	0
I-III	P40	177.2-2	2	2	2	5	9	11	14	12	18	20	19	20	17	18	21	22	20	17	17	18	23	18	21	26	22	20	23	21	23	25	30	27	24	17	22	24	27	19	19	16	16	18	15	9	2	0	0
I-III	P40	177.2-3	1	3	5	7	8	10	8	8	10	10	12	17	16	11	12	13	14	11	14	15	17	22	15	21	21	22	19	24	21	25	15	13	20	17	12	12	14	9	8	3	0	0	0	0	0	0	0
I-III	P40	177.3-1	1	1	1	2	2	2	2	6	10	9	9	9	9	12	11	16	13	17	17	15	10	9	15	17	14	15	14	15	19	16	19	22	17	18	20	17	19	25	20	18	12	11	11	10	6	6	3
I-III	P40	177.3-2	2	4	3	6	8	8	10	7	13	11	12	13	15	17	20	20	18	20	15	23	19	19	12	20	12	15	15	17	17	20	15	12	14	18	18	14	15	14	12	17	19	15	14	9	1	0	0
I-III	P40	177.3-3	3	3	5	8	5	8	10	15	16	16	16	18	18	21	19	19	17	19	16	20	21	22	22	17	25	25	28	28	24	23	23	21	25	18	13	16	16	18	14	15	14	17	16	14	18	16	16
I-III	P47	191.1-1	5	12	10	10	13	11	14	16	16	18	20	30	23	23	25	21	22	30	31	36	29	37	34	27	24	23	27	24	27	29	28	22	25	22	14	5	1	1	0	0	0	0	0	0	0	0	0
I-III	P47	191.1-2	2	2	5	8	9	7	12	11	10	12	14	13	11	12	11	13	17	17	26	18	24	19	21	21	18	17	21	22	25	17	21	22	22	22	19	18	19	19	25	19	21	30	26	24	17	17	10
I-III	P47	191.2-4	1	4	9	6	13	17	8	12	17	19	20	22	22	27	27	21	34	29	32	33	32	26	28	27	25	26	20	20	29	25	23	22	22	18	13	9	10	12	8	8	7	5	3	1	0	0	0
I-III	P37	195.2-1	2	6	9	9	8	11	18	14	12	20	23	21	21	28	21	26	29	32	33	27	27	28	27	29	22	16	16	14	8	7	8	5	6	10	11	8	6	5	1	0	0	0	0	0	0	0	0
I-III	P37	195.2-2	2	3	6	5	11	11	9	13	11	16	12	15	15	20	12	15	8	12	11	10	15	10	15	21	22	20	27	24	24	26	30	32	34	30	31	25	12	12	13	13	11	9	7	4	4	5	3
I-III	P37	195.3-1	5	6	10	10	12	16	16	17	20	20	21	20	28	14	12	13	8	12	15	19	20	22	18	18	15	17	15	13	13	8	7	3	5	3	0	0	0	0	0	0	0	0	0	0	0	0	0
I-III	P38	201.2-1	3	4	6	6	10	8	9	13	10	14	9	14	12	12	18	14	18	14	25	22	27	24	19	25	25	24	24	24	20	18	25	30	26	24	26	26	28	27	19	15	7	0	0	0	0	0	0
I-III	P38	201.2-2	6	8	15	10	17	16	14	12	15	21	29	26	24	22	23	21	26	26	28	21	13	8	3	0	0	0	0	0	0	0	0	0	0	0	0	0	0	0	0	0	0	0	0	0	0	0	0
I-III	P38	201.3-1	4	4	10	10	7	16	15	15	18	16	22	17	19	25	17	16	15	10	15	22	17	20	29	24	26	35	26	32	39	35	23	23	21	19	5	1	0	0	0	0	0	0	0	0	0	0	0
I-III	P38	201.3-2	2	6	11	14	15	18	16	20	17	18	16	18	17	22	15	20	26	16	20	23	23	28	21	23	20	20	26	24	25	28	21	22	28	24	25	21	23	24	21	21	5	7	3	1	0	0	0
I-III	P47	204.2 P47_lobiii	4	6	6	9	11	13	12	15	17	21	22	23	22	26	22	27	22	23	22	25	21	17	16	16	13	21	15	18	18	23	17	13	13	13	14	14	14	15	13	16	14	12	10	12	7	11	8
I-III	P47	204.4 P47_lobiii	1	3	3	3	4	6	10	11	15	9	14	14	19	18	16	15	16	14	15	16	16	20	14	20	17	15	14	20	17	24	22	22	24	19	25	20	23	19	22	21	22	17	17	19	16	10	7
I-III	P30	205.1 P30_lobiii	3	6	7	6	11	11	11	15	19	19	21	23	21	23	25	28	29	28	20	16	16	16	18	20	21	18	24	17	14	11	11	5	4	2	4	0	0	0	0	0	0	0	0	0	0	0	0
I-III	P30	205.2 P30_lobii	3	3	4	9	8	6	5	6	5	11	11	15	12	15	10	14	12	14	17	13	13	14	11	11	10	8	14	19	20	19	19	15	18	22	15	13	11	8	9	7	7	3	1	1	1	0	0
I-III	P30	205.3 P30_lobiii	4	4	5	9	8	9	9	17	14	16	21	22	19	23	25	28	33	35	27	28	30	25	26	32	32	30	23	22	21	20	24	26	23	24	26	14	12	16	14	4	2	0	0	0	0	0	0
I-III	P33	206.3 P33_lobiii	2	4	9	12	15	13	23	15	20	21	29	30	24	25	31	29	29	28	31	35	33	36	34	37	38	36	33	47	33	27	21	13	5	0	0	0	0	0	0	0	0	0	0	0	0	0	0
I-III	P39	207.1 P39_ lobiii	3	8	6	11	16	11	13	13	23	18	12	15	18	13	19	13	12	16	14	14	13	10	13	15	12	13	13	11	11	16	9	12	10	11	9	4	1	0	0	0	0	0	0	0	0	0	0
I-III	P39	207.1 P39_lobiii	4	7	7	5	4	14	12	7	14	19	12	12	10	12	12	13	16	14	13	16	13	22	15	16	17	14	16	17	17	16	14	15	12	12	6	2	1	0	0	0	0	0	0	0	0	0	0
I-III	P39	207.3 P39_lobiii	3	5	9	12	11	12	12	16	14	11	12	14	17	11	15	15	15	16	26	25	21	27	22	29	30	29	26	24	25	29	29	24	24	20	20	18	14	15	10	11	12	13	10	9	4	4	1
I-III	P57	135.2	2	6	6	6	13	12	13	21	18	21	24	28	30	30	34	29	23	22	12	17	19	18	18	23	19	19	16	12	12	12	12	15	13	8	2	3	2	1	0	0	0	0	0	0	0	0	0
I-III	P57	135.3-3	2	4	6	6	9	8	12	16	11	16	20	16	20	22	25	34	27	26	28	23	22	18	25	22	21	21	25	24	18	20	16	15	20	14	12	10	7	9	3	0	0	0	0	0	0	0	0
IX-X	P42	129.1	1	2	3	5	8	12	11	22	14	18	21	26	18	17	15	18	15	14	17	23	19	18	19	25	23	21	21	21	21	14	3	2	0	0	0	0	0	0	0	0	0	0	0	0	0	0	0
IX-X	P49	132.1-2	1	2	8	11	9	15	20	25	19	18	13	21	29	16	22	21	21	16	14	19	17	19	24	23	23	12	15	10	7	7	8	4	2	0	0	0	0	0	0	0	0	0	0	0	0	0	0
IX-X	P49	141.3	1	1	1	1	2	5	8	9	11	7	13	14	11	16	14	10	12	12	15	15	12	14	15	12	4	1	0	0	0	0	0	0	0	0	0	0	0	0	0	0	0	0	0	0	0	0	0
IX-X	P49	162.1-1	2	4	8	9	12	10	10	9	12	14	21	20	17	16	21	29	28	26	22	28	28	23	30	35	25	23	24	16	15	13	12	7	11	10	7	6	0	0	0	0	0	0	0	0	0	0	0
IX-X	P40	177.2-4	1	1	1	1	1	2	7	6	6	7	4	10	8	14	14	16	18	18	16	17	12	13	14	10	8	5	2	1	0	0	0	0	0	0	0	0	0	0	0	0	0	0	0	0	0	0	0
IX-X	P40	177.2-5	1	1	1	1	2	2	5	9	10	6	7	7	9	8	11	13	11	9	15	12	11	13	14	12	13	7	4	3	4	2	1	0	0	0	0	0	0	0	0	0	0	0	0	0	0	0	0
IX-X	P47	191.1-3	2	3	7	7	9	10	12	10	9	8	12	11	8	12	14	18	17	13	16	17	17	20	25	22	25	27	18	12	10	9	12	8	5	6	3	3	4	3	1	0	0	0	0	0	0	0	0
IX-X	P47	191.2-1	1	1	4	5	3	3	8	6	9	11	18	18	17	22	23	21	26	22	16	17	17	17	13	10	7	4	1	0	0	0	0	0	0	0	0	0	0	0	0	0	0	0	0	0	0	0	0
IX-X	P47	191.2-2	1	5	6	7	6	10	17	15	18	13	18	20	25	21	22	31	22	24	24	20	23	25	21	22	25	20	22	22	21	23	14	14	12	11	9	9	8	5	0	0	0	0	0	0	0	0	0
IX-X	P47	191.2-3	2	5	6	9	13	12	12	14	19	18	19	20	24	24	19	18	18	16	14	12	14	12	16	16	15	14	12	17	18	13	14	13	11	13	12	11	12	8	3	1	0	0	0	0	0	0	0
IX-X	P47	191.3-1	4	6	4	8	11	10	18	11	13	9	11	9	6	7	1	1	0	0	0	0	0	0	0	0	0	0	0	0	0	0	0	0	0	0	0	0	0	0	0	0	0	0	0	0	0	0	0
IX-X	P47	191.3-2	1	1	1	2	1	5	5	7	6	9	6	5	6	12	12	12	10	14	13	7	12	12	14	14	8	3	0	0	0	0	0	0	0	0	0	0	0	0	0	0	0	0	0	0	0	0	0
IX-X	P47	191.3-3	2	3	4	4	7	5	9	8	14	14	16	12	15	19	16	18	19	19	26	22	26	31	30	26	25	27	25	21	21	19	18	14	16	13	10	5	3	2	0	0	0	0	0	0	0	0	0
IX-X	P37	195.1-1	2	2	6	5	10	13	11	12	11	17	15	20	19	24	25	27	21	20	24	17	17	22	18	13	19	12	12	9	15	17	10	3	1	0	0	0	0	0	0	0	0	0	0	0	0	0	0
IX-X	P37	195.1-2	4	5	6	8	6	11	12	13	8	10	11	9	6	7	6	7	7	7	8	10	10	6	3	4	1	1	0	0	0	0	0	0	0	0	0	0	0	0	0	0	0	0	0	0	0	0	0
IX-X	P37	195.3-2	1	3	5	3	6	6	8	13	15	21	21	18	19	18	15	25	15	21	21	22	22	33	26	30	29	24	21	18	17	18	13	16	7	4	2	0	0	0	0	0	0	0	0	0	0	0	0
IX-X	P38	201.1-1	2	7	8	11	13	12	8	10	19	19	21	15	21	20	16	18	18	15	18	23	20	20	20	18	9	9	5	3	0	0	0	0	0	0	0	0	0	0	0	0	0	0	0	0	0	0	0
IX-X	P38	201.1-2	5	5	4	6	4	3	9	10	9	7	12	10	10	12	10	9	4	4	2	0	0	0	0	0	0	0	0	0	0	0	0	0	0	0	0	0	0	0	0	0	0	0	0	0	0	0	0
IX-X	P38	201.4-2	3	3	6	8	9	13	12	14	17	14	14	21	10	13	12	19	19	22	20	25	20	21	25	26	18	20	16	2	2	0	0	0	0	0	0	0	0	0	0	0	0	0	0	0	0	0	0
IX-X	P38	201.5-1	2	5	3	8	9	13	13	12	13	12	15	17	15	20	19	19	18	15	21	20	22	22	26	18	21	16	16	13	8	4	5	7	5	5	3	2	0	0	0	0	0	0	0	0	0	0	0
IX-X	P38	201.5-2	3	6	9	11	7	8	19	17	14	12	16	16	22	12	16	27	24	18	10	9	6	3	0	0	0	0	0	0	0	0	0	0	0	0	0	0	0	0	0	0	0	0	0	0	0	0	0
IX-X	P38	201.5-3	1	1	1	2	5	5	4	6	11	11	9	10	9	10	10	13	7	9	10	9	12	7	10	9	5	0	0	0	0	0	0	0	0	0	0	0	0	0	0	0	0	0	0	0	0	0	0
IX-X	P47	204.2 P47_lobx	2	5	3	9	10	10	7	6	11	14	14	17	19	16	14	18	18	18	10	10	8	10	5	3	5	0	0	0	0	0	0	0	0	0	0	0	0	0	0	0	0	0	0	0	0	0	0
IX-X	P30	205.1 P30_lobx	1	1	1	1	4	3	2	2	3	3	3	3	6	10	5	5	3	4	5	9	8	8	8	6	7	9	7	6	3	5	4	3	0	0	0	0	0	0	0	0	0	0	0	0	0	0	0
IX-X	P30	205.2 P30_lobx	1	1	1	1	2	3	5	5	6	9	8	7	10	9	11	8	11	9	10	6	6	9	8	6	7	9	2	0	0	0	0	0	0	0	0	0	0	0	0	0	0	0	0	0	0	0	0
IX-X	P33	206.1 P33_ lobx	3	4	6	7	6	8	6	9	9	8	16	11	12	15	15	9	11	6	7	6	5	4	3	2	0	0	0	0	0	0	0	0	0	0	0	0	0	0	0	0	0	0	0	0	0	0	0
IX-X	P33	206.2 P33_ lobx	4	6	13	9	10	9	9	17	16	13	18	22	20	18	6	8	7	5	1	0	0	0	0	0	0	0	0	0	0	0	0	0	0	0	0	0	0	0	0	0	0	0	0	0	0	0	0
IX-X	P33	206.2 P33_lobx	3	4	3	5	8	6	6	5	8	11	10	10	12	8	10	10	11	13	17	16	15	11	9	9	11	7	4	4	4	2	1	0	0	0	0	0	0	0	0	0	0	0	0	0	0	0	0
IX-X	P39	207.1 P39_lobx	2	3	6	4	11	9	10	6	7	12	8	8	7	4	10	8	6	8	9	6	9	8	6	3	6	9	4	5	3	0	0	0	0	0	0	0	0	0	0	0	0	0	0	0	0	0	0
IX-X	P39	207.2 P39_ lobx	1	2	6	6	6	6	9	11	13	17	16	18	15	13	14	12	20	14	25	13	17	17	16	21	19	13	13	9	10	9	7	5	5	5	2	3	1	2	1	0	0	0	0	0	0	0	0
IX-X	P39	207.2 P39_lobx	1	3	6	7	5	7	8	7	13	9	15	10	11	14	4	4	3	7	4	1	0	0	0	0	0	0	0	0	0	0	0	0	0	0	0	0	0	0	0	0	0	0	0	0	0	0	0
IX-X	P39	207.3 P39_ lobx	3	8	10	14	12	13	12	14	12	17	17	18	20	23	21	29	30	31	33	27	30	32	25	19	21	17	12	8	7	0	0	0	0	0	0	0	0	0	0	0	0	0	0	0	0	0	0
IX-X	P55	133.2-2	2	3	4	5	8	5	11	8	12	12	18	16	16	20	16	20	18	20	15	11	9	15	10	11	16	16	19	18	14	17	16	12	13	10	5	2	0	0	0	0	0	0	0	0	0	0	0
IX-X	P57	135.4-4	7	9	9	10	6	10	9	5	11	11	16	18	21	23	14	26	20	23	30	26	24	26	29	38	35	32	35	25	24	13	13	15	9	10	5	13	7	4	2	1	2	2	1	0	0	0	0
IX-X	P57	135.5-5	2	2	3	5	4	7	9	13	11	9	13	10	16	14	14	15	18	16	16	16	26	27	28	28	28	23	21	16	14	13	12	6	2	0	0	0	0	0	0	0	0	0	0	0	0	0	0
I-III	P154	83.2-3	4	10	10	14	15	19	26	16	24	31	24	34	34	31	18	25	21	21	23	29	24	27	33	23	30	26	23	29	25	20	30	36	25	31	18	13	10	8	17	5	6	3	4	7	0	0	0
I-III	P62	84.4-7	5	8	10	8	11	18	19	16	25	17	20	24	26	28	29	25	20	17	18	14	17	9	5	2	0	0	0	0	0	0	0	0	0	0	0	0	0	0	0	0	0	0	0	0	0	0	0
I-III	P64	85.1-2	1	4	3	3	4	4	4	4	9	6	8	9	9	9	13	9	8	12	4	10	7	8	11	13	13	14	9	10	13	14	10	13	14	16	11	11	13	8	7	7	12	8	12	9	8	7	6
I-III	P64	85.3-4	2	5	8	5	8	9	13	10	9	12	11	12	15	21	17	17	14	21	17	15	17	22	21	22	21	28	23	22	23	21	24	26	28	26	26	26	30	31	23	24	19	15	14	16	13	14	13
I-III	P71	86.2-5	13	12	19	20	32	43	26	30	46	41	53	42	31	37	40	41	43	42	45	36	25	34	11	22	8	4	0	0	0	0	0	0	0	0	0	0	0	0	0	0	0	0	0	0	0	0	0
I-III	P72	87.2-4	2	7	11	11	14	14	10	14	13	13	20	13	12	11	7	8	7	8	8	6	5	9	4	4	7	3	2	0	0	0	0	0	0	0	0	0	0	0	0	0	0	0	0	0	0	0	0
I-III	P74	88.1-2	10	10	10	12	8	8	7	12	10	13	11	11	11	15	15	14	12	17	19	20	16	21	22	20	23	25	20	24	22	20	16	23	20	17	22	21	18	19	23	17	15	21	21	25	20	12	23
I-III	P74	88.1-3	3	4	10	11	13	11	12	14	16	19	14	13	17	15	13	17	17	18	23	21	22	22	24	31	27	31	28	24	34	29	30	22	17	15	8	6	2	1	0	0	0	0	0	0	0	0	0
I-III	P74	88.5-8	3	6	10	13	12	18	17	19	18	19	20	22	12	14	11	11	12	20	18	18	23	21	20	21	23	21	24	23	19	19	25	27	23	18	14	8	6	7	4	5	1	0	0	0	0	0	0
I-III	P69	119.1-1	1	5	9	7	13	11	15	16	25	18	32	27	28	33	21	29	33	23	30	20	18	29	16	21	12	7	5	6	12	11	4	1	0	0	0	0	0	0	0	0	0	0	0	0	0	0	0
I-III	P107	128.1	3	3	3	9	6	11	10	14	18	16	15	15	16	19	22	18	23	23	26	19	32	27	23	26	27	28	28	28	21	19	27	23	28	29	30	34	22	31	34	27	22	16	7	6	2	0	0
I-III	P63	141.1-1	2	5	3	9	10	10	6	6	8	14	15	18	14	29	25	20	23	25	21	16	14	22	21	19	25	24	24	18	19	29	19	11	4	0	0	0	0	0	0	0	0	0	0	0	0	0	0
I-III	P127	147.1-1	5	5	6	8	10	12	8	13	13	16	10	17	12	11	12	10	19	20	17	21	21	17	17	14	13	14	13	16	13	24	17	21	14	8	0	0	0	0	0	0	0	0	0	0	0	0	0
I-III	P128	148.3	2	4	8	6	10	11	15	15	16	14	20	16	19	17	23	19	18	17	16	15	16	19	11	16	18	18	21	20	22	21	25	27	24	22	27	25	22	20	20	17	19	17	13	12	9	8	5
I-III	P75	153.1-1	3	4	8	9	8	8	12	15	19	17	15	15	15	14	15	17	15	12	20	13	17	19	29	25	24	22	21	19	23	26	26	32	27	29	25	24	29	31	29	30	33	29	25	20	12	11	2
I-III	P75	153.2-1	1	1	4	8	10	10	13	10	6	17	18	26	18	20	19	27	25	17	19	16	23	22	24	23	24	27	29	25	26	28	20	17	21	29	34	30	27	34	34	34	38	39	33	25	17	14	15
I-III	P90	159.6-1	1	2	6	12	13	12	13	21	21	28	25	22	21	24	23	22	32	33	23	26	32	31	30	37	24	22	18	12	16	13	12	9	8	5	7	0	0	0	0	0	0	0	0	0	0	0	0
I-III	P91	160.1-1	6	12	10	13	12	17	14	18	21	17	24	19	23	19	18	18	21	17	18	19	26	20	29	26	26	22	21	24	18	19	22	24	19	20	17	22	21	21	19	23	20	21	17	22	13	13	11
I-III	P91	160.3-1	1	7	10	9	15	13	16	16	13	23	26	21	12	18	24	23	22	25	30	30	22	22	22	21	18	18	25	21	27	28	23	27	27	25	25	24	27	25	24	23	23	21	14	18	18	20	16
I-III	P76	164.1-1	3	3	7	12	10	9	9	12	13	19	21	16	11	17	15	11	11	9	11	9	12	14	13	15	13	14	13	14	14	9	13	10	15	14	16	15	10	9	15	16	15	18	18	20	23	15	13
I-III	P76	164.4-1	3	4	3	5	5	6	8	12	11	15	6	11	14	10	12	16	18	15	16	21	16	16	16	16	22	23	16	24	19	14	16	18	19	18	16	16	11	12	16	14	12	13	5	5	2	0	0
I-III	P68	165.2-1	1	4	5	5	9	8	17	9	13	15	20	24	22	23	21	20	24	24	31	33	28	31	30	29	32	25	23	22	10	8	10	7	6	4	1	0	0	0	0	0	0	0	0	0	0	0	0
I-III	P67	167.2-1	2	7	9	14	14	13	15	20	20	19	17	19	30	25	30	24	25	32	32	33	23	24	21	22	29	20	23	22	13	7	5	1	0	0	0	0	0	0	0	0	0	0	0	0	0	0	0
I-III	P67	167.5-2	4	9	11	12	10	15	16	21	22	20	28	21	28	26	35	32	32	32	23	20	24	21	26	33	24	18	20	23	22	24	26	26	11	1	0	0	0	0	0	0	0	0	0	0	0	0	0
I-III	P63	168.2-3	4	3	2	6	8	11	12	15	18	16	19	19	17	18	21	22	22	18	26	23	24	23	27	27	23	32	29	24	25	19	16	9	8	10	6	9	12	11	10	7	7	7	5	2	1	2	0
I-III	P98	170.1-1	2	6	8	10	10	11	12	19	17	18	22	19	20	17	24	20	30	22	17	23	24	26	23	29	27	25	17	23	21	10	4	0	0	0	0	0	0	0	0	0	0	0	0	0	0	0	0
I-III	P98	170.3-2	4	7	12	13	17	16	21	15	18	31	23	26	22	29	18	19	21	30	30	27	26	25	21	29	25	27	11	25	0	0	0	0	0	0	0	0	0	0	0	0	0	0	0	0	0	0	0
I-III	P72	171.1-1	3	8	10	14	15	20	15	14	17	18	21	23	25	18	26	21	14	19	18	16	17	19	16	18	23	22	22	19	20	17	22	24	28	23	28	23	15	6	9	6	1	0	0	0	0	0	0
I-III	P72	171.2-1	5	5	5	7	11	10	14	15	18	15	18	15	21	21	20	20	24	24	29	30	24	31	27	31	29	30	35	30	35	33	40	38	27	29	27	24	24	20	18	17	15	18	16	9	10	8	8
I-III	P72	171.2-2	3	3	10	11	11	8	16	13	9	14	14	15	16	19	23	22	19	24	28	24	28	28	24	29	21	22	13	9	10	4	2	0	0	0	0	0	0	0	0	0	0	0	0	0	0	0	0
I-III	P72	171.2-4	3	7	8	8	10	11	12	9	10	7	12	10	12	13	17	18	15	18	18	20	19	18	20	22	26	27	23	25	23	20	25	16	19	21	18	9	5	1	0	0	0	0	0	0	0	0	0
I-III	P187	172.1-1	5	6	8	8	10	6	10	9	16	18	13	18	14	23	26	24	22	27	27	28	21	18	20	17	16	11	13	11	6	3	1	0	0	0	0	0	0	0	0	0	0	0	0	0	0	0	0
I-III	P187	172.1-2	4	4	7	9	9	10	7	15	13	17	12	19	17	16	14	15	14	7	17	16	15	16	14	17	20	25	23	19	17	24	16	11	15	12	8	7	4	3	2	0	0	0	0	0	0	0	0
I-III	P187	172.2-1	4	3	5	9	8	12	17	14	19	15	18	21	19	23	20	23	25	24	28	34	30	30	24	32	31	29	39	33	27	25	16	8	3	2	0	0	0	0	0	0	0	0	0	0	0	0	0
I-III	P187	172.2-2	4	3	9	8	8	10	14	14	14	21	22	18	19	14	18	17	15	19	20	22	20	19	20	20	21	26	24	30	25	26	26	28	29	32	36	32	31	31	24	14	11	5	1	0	0	0	0
I-III	P187	172.2-3	2	4	8	7	14	7	12	14	16	17	13	12	23	22	28	29	26	29	22	27	18	23	23	21	26	17	18	15	19	17	21	21	20	18	27	22	20	20	21	19	20	10	5	4	2	1	1
I-III	P187	172.2-4	1	1	3	5	7	10	8	16	10	15	17	18	14	14	16	16	15	19	18	18	15	16	15	14	13	17	15	12	17	14	12	18	19	22	19	21	19	17	17	15	19	20	16	15	10	10	8
I-III	P187	172.4-4	2	4	7	7	10	9	12	14	13	15	20	13	15	19	22	20	20	30	24	17	19	20	17	21	23	16	10	10	3	3	0	0	0	0	0	0	0	0	0	0	0	0	0	0	0	0	0
I-III	P187	172.4-5	3	3	5	6	11	12	14	13	17	20	17	19	17	22	25	21	19	20	20	23	22	28	20	29	28	25	17	15	13	10	5	4	3	2	0	0	0	0	0	0	0	0	0	0	0	0	0
I-III	P86	174.1-1	2	6	7	9	7	15	14	13	15	20	18	20	19	15	19	24	24	37	32	28	29	28	23	20	17	18	20	24	18	19	19	21	23	26	20	7	1	0	0	0	0	0	0	0	0	0	0
I-III	P86	174.1-2	1	3	7	9	10	14	13	15	20	20	18	18	22	25	20	21	25	27	28	25	25	23	25	25	31	35	34	31	42	36	30	29	30	26	25	28	22	24	23	24	18	13	7	4	7	3	2
I-III	P86	174.1-3	3	4	3	6	8	11	12	15	14	11	16	20	15	11	17	24	21	22	22	23	18	23	18	26	18	22	27	25	21	25	19	22	20	25	23	24	23	24	23	6	0	0	0	0	0	0	0
I-III	P86	174.1-4	3	8	8	8	14	21	15	19	19	23	16	18	14	24	29	25	25	26	24	24	32	27	23	19	18	23	24	27	21	24	23	24	25	22	15	15	12	13	8	6	2	0	0	0	0	0	0
I-III	P112	178.1-4	1	3	5	12	12	13	9	15	13	8	10	16	15	12	12	18	24	22	19	16	18	19	16	15	13	15	14	15	17	16	13	15	19	17	20	21	17	17	19	19	23	24	22	25	24	24	26
I-III	P90	179.2-1	4	3	8	11	10	14	13	14	20	16	12	15	8	10	13	15	16	19	16	24	22	20	23	25	26	26	26	30	25	20	16	20	30	28	22	23	23	25	25	21	13	8	6	5	1	0	0
I-III	P102	203.1-2	1	5	8	10	10	11	10	11	12	14	14	12	14	15	17	19	21	21	23	17	26	27	25	23	32	24	23	25	17	8	0	0	0	0	0	0	0	0	0	0	0	0	0	0	0	0	0
I-III	P102	203.2-3	1	3	8	5	14	17	12	12	10	13	15	15	19	17	17	14	12	15	13	12	11	10	13	15	14	16	14	14	18	17	19	15	13	13	11	11	9	5	3	1	1	0	0	0	0	0	0
I-III	P102	203.3-1	3	3	10	8	8	12	11	12	14	12	15	18	19	24	22	22	21	21	18	19	15	18	15	19	17	14	11	11	10	5	4	4	4	3	1	0	0	0	0	0	0	0	0	0	0	0	0
I-III	P61	208.1 P61_lobiii2	2	3	7	7	10	13	14	12	13	14	17	15	19	21	26	28	25	25	21	21	22	29	25	28	24	26	22	25	25	29	29	27	26	27	31	23	18	14	9	10	7	5	2	0	0	0	0
I-III	P173	209.2 P173_lobiii	4	8	11	14	11	13	17	17	19	22	18	23	27	19	18	17	12	8	5	3	1	0	0	0	0	0	0	0	0	0	0	0	0	0	0	0	0	0	0	0	0	0	0	0	0	0	0
I-III	P173	209.3 P173_lobiii	3	7	9	10	12	18	19	17	18	24	22	27	26	32	32	27	32	37	39	40	42	42	46	45	42	41	30	24	10	1	0	0	0	0	0	0	0	0	0	0	0	0	0	0	0	0	0
I-III	P173	209.4 P173_lobiii	3	10	7	10	14	9	16	18	18	19	15	16	13	14	17	16	12	15	19	19	18	24	25	17	21	22	25	25	22	24	22	28	27	30	25	25	24	19	19	19	25	20	14	8	1	0	0
I-III	P173	209.5 P173_lobiii1	6	9	5	9	10	9	17	11	15	14	16	8	12	13	19	20	19	14	15	12	12	12	14	13	10	3	6	7	5	4	1	0	0	0	0	0	0	0	0	0	0	0	0	0	0	0	0
I-III	P173	209.5 P173_lobiii2	3	5	10	6	12	12	17	16	17	17	15	25	27	22	25	20	26	25	23	22	23	21	23	24	27	26	29	24	23	26	27	23	19	22	17	18	9	6	2	4	1	1	0	0	0	0	0
I-III	P161	213.1 P161_lobiii1	3	9	9	16	13	16	23	13	17	11	16	27	27	28	28	20	21	17	17	16	14	17	22	15	20	19	14	17	19	22	17	19	15	13	14	8	6	7	5	1	0	0	0	0	0	0	0
I-III	P161	213.1 P161_lobiii2	4	5	7	13	14	14	21	18	20	22	18	18	19	25	27	27	26	24	22	24	18	16	18	14	12	10	10	5	6	3	4	3	1	0	0	0	0	0	0	0	0	0	0	0	0	0	0
I-III	P161	213.4 P161_lobiii	3	8	8	7	10	9	10	14	12	16	25	21	18	17	18	18	16	19	19	21	11	13	16	17	18	24	21	23	23	25	23	23	25	23	28	33	30	29	22	21	33	32	14	2	1	0	0
I-III	P240	227.1_lobiii1	5	10	11	12	12	20	15	23	26	24	22	18	23	18	23	18	16	12	17	16	16	26	25	22	19	19	22	17	22	16	0	0	0	0	0	0	0	0	0	0	0	0	0	0	0	0	0
I-III	P240	227.1_lobiii2	8	8	4	11	5	14	13	16	11	11	16	15	13	14	14	18	19	17	11	15	19	22	20	22	23	27	24	18	23	24	20	17	8	0	0	0	0	0	0	0	0	0	0	0	0	0	0
I-III	P240	227.1_lobiii3	9	10	10	9	12	10	11	11	13	13	15	17	19	18	17	17	23	20	25	20	15	26	29	30	27	29	24	25	27	17	18	20	15	9	3	2	1	0	0	0	0	0	0	0	0	0	0
I-III	P240	227.3_lobiii	4	10	14	12	9	14	16	12	20	20	15	20	20	21	15	19	14	15	14	14	19	14	12	18	16	13	16	15	15	18	16	16	19	13	14	13	18	15	6	0	0	0	0	0	0	0	0
IX-X	P62	84.4-5	3	7	5	12	14	27	21	27	30	30	31	34	45	42	37	37	41	31	21	12	12	10	8	3	3	0	0	0	0	0	0	0	0	0	0	0	0	0	0	0	0	0	0	0	0	0	0
IX-X	P62	84.4-6	2	5	6	8	10	11	16	18	20	26	31	28	28	31	30	31	31	31	30	23	15	10	1	0	0	0	0	0	0	0	0	0	0	0	0	0	0	0	0	0	0	0	0	0	0	0	0
IX-X	P64	85.1-1	4	6	11	11	16	16	13	18	18	18	23	31	21	16	18	25	23	27	21	27	32	28	25	35	34	34	32	34	39	40	33	39	36	35	30	18	12	15	8	7	3	1	0	0	0	0	0
IX-X	P64	85.2-3	1	1	5	6	6	10	6	10	8	7	4	11	11	16	9	13	20	11	19	20	18	20	18	18	8	4	4	3	1	2	1	0	0	0	0	0	0	0	0	0	0	0	0	0	0	0	0
IX-X	P71	86.3-6	9	10	8	5	10	10	15	11	13	12	16	16	33	29	23	32	29	31	30	28	26	26	24	26	31	42	52	43	50	31	19	16	4	2	3	1	0	0	0	0	0	0	0	0	0	0	0
IX-X	P72	87.1-1	1	1	3	7	6	9	10	10	8	10	9	7	7	6	12	7	10	12	12	15	15	12	15	17	13	18	23	20	18	21	15	22	19	21	21	15	16	20	24	22	25	21	19	16	8	0	0
IX-X	P72	87.3-5	6	5	11	10	9	9	16	8	11	15	12	11	16	18	29	29	30	31	34	31	25	30	38	26	29	33	32	31	33	27	33	35	27	22	14	4	3	0	0	0	0	0	0	0	0	0	0
IX-X	P72	87.3-6	2	6	9	7	9	14	13	16	23	20	18	22	20	18	17	10	15	10	8	8	17	12	15	19	19	17	19	11	13	10	8	4	0	0	0	0	0	0	0	0	0	0	0	0	0	0	0
IX-X	P72	87.4-7	3	6	10	9	5	9	13	15	25	22	28	19	23	31	33	35	31	42	30	27	22	13	6	8	6	6	7	5	4	2	1	0	0	0	0	0	0	0	0	0	0	0	0	0	0	0	0
IX-X	P72	87.4-8	2	7	12	12	10	13	17	13	16	16	17	21	20	25	18	20	18	25	13	17	14	12	14	17	12	12	10	7	10	9	8	4	6	8	7	4	6	3	1	0	0	0	0	0	0	0	0
IX-X	P74	88.1-1	2	2	4	5	5	5	7	13	10	16	11	12	18	17	12	17	16	17	28	22	26	28	26	18	15	18	17	14	11	11	13	11	8	8	0	0	0	0	0	0	0	0	0	0	0	0	0
IX-X	P74	88.2-4	3	2	5	8	9	13	13	19	22	23	25	23	18	13	13	10	16	15	16	13	15	10	10	6	7	3	0	0	0	0	0	0	0	0	0	0	0	0	0	0	0	0	0	0	0	0	0
IX-X	P70	120.1	1	1	1	1	2	1	1	3	3	5	8	5	6	13	16	16	21	17	19	27	27	26	28	28	25	29	30	19	24	16	23	6	2	0	0	0	0	0	0	0	0	0	0	0	0	0	0
IX-X	P127	147.2	2	9	9	19	12	16	18	25	22	27	34	40	43	43	39	36	46	39	23	15	21	9	5	4	0	0	0	0	0	0	0	0	0	0	0	0	0	0	0	0	0	0	0	0	0	0	0
IX-X	P127	147.3	3	7	11	11	16	16	19	24	22	32	27	32	36	34	30	31	27	30	30	23	24	26	18	17	12	4	4	2	0	0	0	0	0	0	0	0	0	0	0	0	0	0	0	0	0	0	0
IX-X	P127	147.4	2	1	3	6	9	13	17	21	23	27	26	29	22	27	39	42	44	40	51	45	36	34	29	31	28	40	41	33	30	39	39	31	25	14	6	5	1	0	0	0	0	0	0	0	0	0	0
IX-X	P128	148.2-1	1	6	5	7	9	12	14	19	17	16	24	23	24	22	34	28	26	26	15	9	5	6	0	0	0	0	0	0	0	0	0	0	0	0	0	0	0	0	0	0	0	0	0	0	0	0	0
IX-X	P75	153.3-1	3	3	5	7	18	13	15	10	14	19	22	18	12	18	29	20	18	32	34	31	29	32	38	18	40	29	38	40	28	26	27	21	17	15	13	8	4	1	0	0	0	0	0	0	0	0	0
IX-X	P62	158.1-1	1	1	4	5	5	6	7	8	10	11	9	9	11	14	19	14	14	15	15	13	22	17	25	24	28	30	26	23	20	10	6	4	4	0	0	0	0	0	0	0	0	0	0	0	0	0	0
IX-X	P62	158.2-1	1	4	5	8	10	16	13	13	21	28	26	25	20	15	11	8	7	7	2	3	0	0	0	0	0	0	0	0	0	0	0	0	0	0	0	0	0	0	0	0	0	0	0	0	0	0	0
IX-X	P90	159.4-1	3	3	6	4	7	7	9	7	10	20	18	21	19	21	21	21	29	27	19	29	19	20	17	11	7	0	0	0	0	0	0	0	0	0	0	0	0	0	0	0	0	0	0	0	0	0	0
IX-X	P91	160.4-1	2	1	2	5	4	4	6	10	10	10	11	17	24	23	19	22	21	21	23	20	21	20	17	15	20	15	11	7	4	7	6	5	3	0	0	0	0	0	0	0	0	0	0	0	0	0	0
IX-X	P76	164.3-2	2	1	5	9	9	8	14	14	16	19	19	22	19	20	19	20	21	23	22	17	25	20	22	15	19	14	14	12	10	9	4	8	7	10	6	4	4	1	0	0	0	0	0	0	0	0	0
IX-X	P62	166.1-1	5	3	6	9	9	8	17	16	12	14	18	24	26	22	24	20	27	30	25	27	27	28	41	36	36	39	36	26	22	18	12	8	3	1	3	0	0	0	0	0	0	0	0	0	0	0	0
IX-X	P67	167.1-1	1	3	8	7	10	13	16	11	14	16	15	15	21	16	16	18	16	15	17	20	12	12	6	2	0	0	0	0	0	0	0	0	0	0	0	0	0	0	0	0	0	0	0	0	0	0	0
IX-X	P67	167.2-2	1	4	5	7	6	7	10	14	15	19	21	16	17	20	19	16	21	21	20	20	25	16	19	16	20	22	23	22	20	19	14	7	5	0	0	0	0	0	0	0	0	0	0	0	0	0	0
IX-X	P67	167.3-1	1	1	2	5	10	7	10	10	13	14	11	8	13	13	13	15	11	12	15	15	13	12	12	15	15	20	19	14	5	7	4	6	2	3	0	0	0	0	0	0	0	0	0	0	0	0	0
IX-X	P67	167.5-1	5	3	5	6	15	16	16	18	17	22	25	27	26	23	13	15	21	17	22	20	20	25	23	21	22	11	5	2	0	0	0	0	0	0	0	0	0	0	0	0	0	0	0	0	0	0	0
IX-X	P63	168.1-1	1	1	1	2	4	5	8	6	7	7	6	10	10	14	12	14	11	13	11	16	19	15	17	20	16	22	22	19	23	16	19	13	13	11	9	10	4	1	0	0	0	0	0	0	0	0	0
IX-X	P63	168.1-2	1	2	4	7	4	7	9	11	12	12	14	11	14	17	18	17	16	21	16	15	16	18	13	13	11	9	12	7	5	4	2	3	0	0	0	0	0	0	0	0	0	0	0	0	0	0	0
IX-X	P63	168.1-3	2	1	1	1	5	5	14	10	15	16	14	15	18	12	17	15	25	22	28	24	11	5	6	1	0	0	0	0	0	0	0	0	0	0	0	0	0	0	0	0	0	0	0	0	0	0	0
IX-X	P98	170.2-1	5	11	9	10	11	11	14	14	14	13	25	21	28	26	33	30	27	29	28	41	36	39	38	38	35	38	33	17	19	9	2	0	0	0	0	0	0	0	0	0	0	0	0	0	0	0	0
IX-X	P98	170.2-2	2	2	1	7	7	9	9	18	14	23	23	24	23	22	21	17	14	13	18	22	22	25	20	18	23	25	27	29	25	30	31	14	1	0	0	0	0	0	0	0	0	0	0	0	0	0	0
IX-X	P98	170.3-1	1	3	5	6	6	7	10	11	11	9	10	8	10	13	18	17	13	12	14	7	5	6	7	7	6	8	10	9	4	6	5	3	2	2	1	0	0	0	0	0	0	0	0	0	0	0	0
IX-X	P72	171.3-1	2	2	3	6	5	4	5	7	8	9	12	13	10	12	15	16	16	17	15	13	16	15	13	15	19	22	16	19	14	8	3	1	0	0	0	0	0	0	0	0	0	0	0	0	0	0	0
IX-X	P187	172.1-4	1	4	7	8	9	9	9	11	8	12	14	12	14	22	11	16	19	20	20	20	20	14	17	8	21	18	8	10	12	9	6	6	5	1	0	0	0	0	0	0	0	0	0	0	0	0	0
IX-X	P187	172.1-5	3	2	3	8	5	9	10	11	15	18	17	18	24	25	23	25	28	28	25	20	13	8	4	1	0	0	0	0	0	0	0	0	0	0	0	0	0	0	0	0	0	0	0	0	0	0	0
IX-X	P187	172.3-1	1	1	2	3	5	4	9	8	9	16	14	12	14	12	10	15	12	22	21	16	20	22	25	29	24	21	22	22	19	19	22	20	9	1	0	0	0	0	0	0	0	0	0	0	0	0	0
IX-X	P112	178.1-1	2	5	2	3	4	5	3	4	5	10	10	9	13	14	12	9	20	18	17	18	9	16	14	18	14	14	17	19	18	11	10	6	3	0	0	0	0	0	0	0	0	0	0	0	0	0	0
IX-X	P112	178.1-3	1	2	4	4	6	10	13	12	13	14	21	14	20	19	17	16	20	20	15	17	24	18	16	18	15	15	16	10	11	11	7	6	2	1	0	0	0	0	0	0	0	0	0	0	0	0	0
IX-X	P112	178.3-1	1	3	5	3	4	8	12	18	18	18	18	19	16	19	21	21	19	24	23	31	23	19	20	16	24	20	24	20	23	20	23	13	10	2	1	0	0	0	0	0	0	0	0	0	0	0	0
IX-X	P112	178.3-2	3	4	5	5	8	10	6	7	9	7	13	14	13	13	9	8	7	11	12	16	15	15	20	20	19	10	10	5	5	5	6	4	1	1	0	0	0	0	0	0	0	0	0	0	0	0	0
IX-X	P112	178.3-3	1	1	1	1	4	5	6	7	9	9	11	16	13	12	17	18	12	17	17	15	18	19	17	16	14	10	17	12	16	15	10	8	6	7	6	4	4	2	0	0	0	0	0	0	0	0	0
IX-X	P90	179.1-1	1	1	1	1	1	5	5	5	4	7	9	9	15	12	13	12	10	12	11	11	5	7	7	7	7	6	3	5	5	1	4	3	0	0	0	0	0	0	0	0	0	0	0	0	0	0	0
IX-X	P90	179.1-2	1	3	4	7	3	8	8	15	9	15	13	22	15	17	14	12	14	18	20	22	26	21	21	13	13	12	11	9	4	0	0	0	0	0	0	0	0	0	0	0	0	0	0	0	0	0	0
IX-X	P90	179.1-3	2	4	5	5	4	6	12	11	10	18	14	15	14	11	16	15	16	17	11	15	14	15	21	19	23	20	22	22	26	24	17	24	24	23	20	19	20	21	10	4	2	2	1	0	0	0	0
IX-X	P90	179.2-4	1	1	1	1	1	1	2	2	2	2	2	7	9	16	13	13	21	22	20	18	24	21	27	23	21	24	24	13	9	6	3	0	0	0	0	0	0	0	0	0	0	0	0	0	0	0	0
IX-X	P90	179.3-1	2	6	5	3	4	5	6	7	9	7	7	7	8	10	11	12	13	16	17	17	18	12	17	17	14	19	14	18	20	21	25	21	15	15	13	10	2	0	0	0	0	0	0	0	0	0	0
IX-X	P102	203.2-1	1	2	3	5	7	6	7	5	3	4	8	8	7	8	7	8	6	9	9	9	8	8	10	9	6	2	1	0	0	0	0	0	0	0	0	0	0	0	0	0	0	0	0	0	0	0	0
IX-X	P102	203.2-2	2	4	7	9	9	8	12	14	17	17	12	16	20	19	25	18	13	12	6	3	1	0	0	0	0	0	0	0	0	0	0	0	0	0	0	0	0	0	0	0	0	0	0	0	0	0	0
IX-X	P102	203.3-2	1	5	5	3	5	8	9	12	14	12	19	8	14	16	19	17	13	13	18	15	18	15	18	20	16	17	20	17	19	10	11	0	0	0	0	0	0	0	0	0	0	0	0	0	0	0	0
IX-X	P61	208.1 P61_lobx2	1	4	6	9	9	10	9	18	11	16	12	11	10	14	9	9	15	10	8	9	14	8	11	12	19	14	22	16	19	18	21	19	17	17	21	18	19	18	14	14	14	6	7	5	3	0	0
IX-X	P173	209.1 P173_lobx2	2	3	2	4	5	5	11	11	15	17	17	17	20	23	16	13	13	7	4	5	1	1	0	0	0	0	0	0	0	0	0	0	0	0	0	0	0	0	0	0	0	0	0	0	0	0	0
IX-X	P173	209.2 P173_lobx	1	2	2	4	8	5	4	7	7	11	8	9	7	7	8	7	7	8	5	7	8	9	11	9	6	6	6	2	1	2	4	0	0	0	0	0	0	0	0	0	0	0	0	0	0	0	0
IX-X	P173	209.5 P173_lobx	2	3	4	4	3	4	6	9	11	16	13	13	15	19	14	17	18	24	20	19	22	20	20	21	14	12	13	6	6	8	7	6	6	5	6	6	2	1	0	0	0	0	0	0	0	0	0
IX-X	P161	213.1 P161_lobx	3	4	8	11	13	12	14	14	13	15	19	16	19	9	9	10	7	6	13	12	10	7	8	10	0	0	0	0	0	0	0	0	0	0	0	0	0	0	0	0	0	0	0	0	0	0	0
IX-X	P161	213.2 P161_lobx	1	1	4	4	4	7	11	13	13	13	16	11	14	16	21	20	29	22	17	21	18	8	12	9	8	6	3	1	0	0	0	0	0	0	0	0	0	0	0	0	0	0	0	0	0	0	0
IX-X	P161	213.4 P161_lobx	1	1	2	3	2	2	5	6	8	10	9	16	17	18	18	16	17	21	25	25	22	21	19	16	20	18	19	24	20	22	15	9	2	0	0	0	0	0	0	0	0	0	0	0	0	0	0
IX-X	P240	227.3_lobx	2	2	4	7	12	10	12	14	16	15	18	20	12	16	20	25	19	19	14	13	16	20	12	19	15	10	8	9	8	7	4	0	0	0	0	0	0	0	0	0	0	0	0	0	0	0	0
[truncated: 17 more columns]
