# Supplementary material for: Differential spatiotemporal development of Purkinje cell populations and cerebellum-dependent sensorimotor behaviors
Source: eLife. 2021 May 11;10:e63668. doi: 10.7554/eLife.63668 (PMC8195607; doi:10.7554/eLife.63668)
Supplement: Figure 4—source data 1. [file elife-63668-fig4-data1.xlsx]

## Sheet: Sheet1
Animal Nr.	Slide Nr.	Name	Lobule	Age	total Area (um2)	puncta area (um2)	puncta
1	1.1	1_lobx	x	P7	7200	6570	345
1	1.1	2_lobx	x	P7	4693	3878	214
1	1.1	3_lobix	ix	P7	7946	6960	297
1	1.1	4_lobix	ix	P7	7017	4965	235
1	1.1	5_lobix	ix	P7	7720	4213	213
1	1.1	6_lobi	i	P7	4048	2254	25
1	1.1	7_lobii	ii	P7	4752	2182	30
1	1.1	8_lobiii	iii	P7	5366	2312	49
1	1.1	9_lobiii	iii	P7	3806	2265	94
1	1.1	10_lobiii	iii	P7	6301	3134	40
1	1.2	1_lobx	x	P7	9397	8780	316
1	1.2	2_lobx	x	P7	4790	4246	173
1	1.2	3_lobix	ix	P7	5841	4641	198
1	1.2	4_lobix	ix	P7	10081	8550	302
1	1.2	5_lobix	ix	P7	5793	3140	169
1	1.2	6_lobi	i	P7	2778	905	13
1	1.2	7_lobii	ii	P7	2165	364	11
1	1.2	8_lobiii	iii	P7	3151	981	28
1	1.2	9_lobiii	iii	P7	3045	1419	36
1	1.2	10_lobiii	iii	P7	2221	531	2
1	1.3	1_lobx	x	P7	9474	8651	256
1	1.3	2_lobx	x	P7	5945	5464	252
1	1.3	3_lobix	ix	P7	7004	6432	253
1	1.3	4_lobix	ix	P7	6289	4531	97
1	1.3	5_lobix	ix	P7	8127	6131	332
1	1.3	6_lobi	i	P7	6547	4849	60
1	1.3	7_lobii	ii	P7	5096	4087	42
1	1.3	8_lobiii	iii	P7	5673	3872	60
1	1.3	9_lobiii	iii	P7	4938	3743	100
1	1.3	10_lobiii	iii	P7	5257	3877	51
1	1.4	1_lobx	x	P7	2746	1929	42
1	1.4	2_lobx	x	P7	4978	4622	206
1	1.4	3_lobix	ix	P7	8183	6383	392
1	1.4	4_lobix	ix	P7	7548	6937	286
1	1.4	5_lobix	ix	P7	6695	5775	288
1	1.4	6_lobi	i	P7	5722	4929	220
1	1.4	7_lobii	ii	P7	3563	1902	47
1	1.4	8_lobiii	iii	P7	6664	3461	105
1	1.4	9_lobiii	iii	P7	4173	2761	85
1	1.4	10_lobiii	iii	P7	4177	2698	74
2	1.1	1_lobx	x	P7	7834	7318	253
2	1.1	2_lobx	x	P7	6381	5657	288
2	1.1	3_lobix	ix	P7	6824	5092	291
2	1.1	4_lobix	ix	P7	4718	4179	148
2	1.1	5_lobix	ix	P7	7361	6238	370
2	1.1	6_lobi	i	P7	5862	4462	92
2	1.1	7_lobii	ii	P7	4399	2325	25
2	1.1	8_lobiii	iii	P7	5430	2559	17
2	1.1	9_lobiii	iii	P7	4252	1350	15
2	1.1	10_lobiii	iii	P7	4106	883	8
2	1.2	1_lobx	x	P7	7889	6485	61
2	1.2	2_lobx	x	P7	5941	5597	234
2	1.2	3_lobix	ix	P7	6681	5727	358
2	1.2	4_lobix	ix	P7	5931	4552	214
2	1.2	5_lobix	ix	P7	9973	8455	502
2	1.2	6_lobi	i	P7	4930	1110	2
2	1.2	7_lobii	ii	P7	5160	2717	24
2	1.2	8_lobiii	iii	P7	4645	1535	16
2	1.2	9_lobiii	iii	P7	3958	1541	13
2	1.2	10_lobiii	iii	P7	5560	1341	11
2	1.3	1_lobx	x	P7	7328	6625	280
2	1.3	2_lobx	x	P7	6222	5738	193
2	1.3	3_lobix	ix	P7	7456	7182	397
2	1.3	4_lobix	ix	P7	6940	4983	213
2	1.3	5_lobix	ix	P7	6534	5227	296
2	1.3	6_lobi	i	P7	7422	4978	47
2	1.3	7_lobii	ii	P7	5047	2002	13
2	1.3	8_lobiii	iii	P7	5807	2333	14
2	1.3	9_lobiii	iii	P7	5369	1668	15
2	1.3	10_lobiii	iii	P7	5522	2424	15
2	1.4	1_lobx	x	P7	3788	3639	148
2	1.4	2_lobx	x	P7	4058	3658	155
2	1.4	3_lobix	ix	P7	8021	6819	317
2	1.4	4_lobix	ix	P7	5605	4769	204
2	1.4	5_lobix	ix	P7	4562	4138	217
2	1.4	6_lobi	i	P7	5604	3804	35
2	1.4	7_lobii	ii	P7	6149	3122	18
2	1.4	8_lobiii	iii	P7	6392	2899	14
2	1.4	9_lobiii	iii	P7	4453	1454	8
2	1.4	10_lobiii	iii	P7	6171	1959	5
3	1.1	1_lobx	x	P7	5151	4610	289
3	1.1	2_lobx	x	P7	7520	6870	403
3	1.1	3_lobix	ix	P7	9106	7281	259
3	1.1	4_lobix	ix	P7	9751	7745	300
3	1.1	5_lobix	ix	P7	9631	6201	180
3	1.1	6_lobi	i	P7	8340	2527	4
3	1.1	7_lobii	ii	P7	5607	604	1
3	1.1	8_lobiii	iii	P7	6810	1235	4
3	1.1	9_lobiii	iii	P7	4650	1372	3
3	1.1	10_lobiii	iii	P7	6801	1361	1
3	1.2	1_lobx	x	P7	11651	10503	314
3	1.2	2_lobx	x	P7	7593	7593	437
3	1.2	3_lobix	ix	P7	8062	6630	157
3	1.2	4_lobix	ix	P7	7090	6723	238
3	1.2	5_lobix	ix	P7	7765	7395	369
3	1.2	6_lobi	i	P7	9944	4739	22
3	1.2	7_lobii	ii	P7	5336	977	2
3	1.2	8_lobiii	iii	P7	8744	820	0
3	1.2	9_lobiii	iii	P7	6669	3425	8
3	1.2	10_lobiii	iii	P7	5749	950	4
3	1.3	1_lobx	x	P7	4089	4089	258
3	1.3	2_lobx	x	P7	4826	4280	260
3	1.3	3_lobix	ix	P7	7654	7654	423
3	1.3	4_lobix	ix	P7	4728	3958	219
3	1.3	5_lobix	ix	P7	3461	2785	9
3	1.3	6_lobi	i	P7	3751	1483	5
3	1.3	7_lobii	iii	P7	3909	1550	12
3	1.3	8_lobiii	iii	P7	3236	639	6
3	1.4	1_lobx	x	P7	6489	5609	323
3	1.4	2_lobx	x	P7	4774	4530	250
3	1.4	3_lobix	ix	P7	7058	6747	357
3	1.4	4_lobix	ix	P7	4448	4195	203
3	1.4	5_lobix	ix	P7	7203	6837	292
3	1.4	6_lobi	i	P7	5968	4211	82
3	1.4	7_lobii	ii	P7	5088	3390	37
3	1.4	8_lobiii	iii	P7	6399	4858	37
3	1.4	9_lobiii	iii	P7	4828	1932	12
3	1.4	10_lobiii	iii	P7	4551	1823	9
4	1.1	2_lobx	x	P14	26770	12338	130
4	1.1	3_lobix	ix	P14	31726	17678	580
4	1.1	4_lobix	ix	P14	34445	14288	232
4	1.1	5_lobix	ix	P14	34113	23280	601
4	1.1	6_lobi	i	P14	26521	15504	412
4	1.1	7_lobii	ii	P14	20057	13826	308
4	1.1	8_lobiii	iii	P14	22085	12589	366
4	1.1	9_lobiii	iii	P14	18975	12536	392
4	1.1	10_lobiii	iii	P14	32218	22104	647
4	1.2	1_lobx	x	P14	26997	8787	242
4	1.2	2_lobx	x	P14	26089	9150	80
4	1.2	3_lobix	ix	P14	32328	19835	612
4	1.2	4_lobix	ix	P14	29629	16833	588
4	1.2	5_lobix	ix	P14	33754	22686	455
4	1.2	6_lobi	i	P14	28376	16193	272
4	1.2	7_lobii	ii	P14	22426	13505	347
4	1.2	8_lobiii	iii	P14	29338	16536	438
4	1.2	9_lobiii	iii	P14	27904	16015	733
4	1.2	10_lobiii	iii	P14	33919	17042	563
4	1.3	1_lobx	x	P14	25123	10696	566
4	1.3	2_lobx	x	P14	17339	9344	94
4	1.3	3_lobix	ix	P14	28246	12321	379
4	1.3	4_lobix	ix	P14	23051	9638	290
4	1.3	5_lobix	ix	P14	23201	7647	97
4	1.3	6_lobi	i	P14	24321	18515	469
4	1.3	7_lobii	ii	P14	19703	12074	253
4	1.3	8_lobiii	iii	P14	27843	15009	53
4	1.3	9_lobiii	iii	P14	23096	13409	10
4	1.3	10_lobiii	iii	P14	21495	11559	319
4	1.4	1_lobx	x	P14	39452	12849	439
4	1.4	2_lobx	x	P14	48310	21413	222
4	1.4	3_lobix	ix	P14	58318	26708	1012
4	1.4	4_lobix	ix	P14	58846	32552	716
4	1.4	5_lobix	ix	P14	63213	28010	395
4	1.4	6_lobi	i	P14	58837	32898	1282
4	1.4	7_lobii	ii	P14	45643	20023	749
4	1.4	8_lobiii	iii	P14	55952	34587	1013
4	1.4	9_lobiii	iii	P14	47035	22511	880
4	1.4	10_lobiii	iii	P14	63136	31573	1214
5	1.1	1_lobx	x	P14	51128	15076	985
5	1.1	2_lobx	x	P14	47891	15106	430
5	1.1	3_lobix	ix	P14	47998	10002	594
5	1.1	4_lobix	ix	P14	73072	17433	1253
5	1.1	5_lobix	ix	P14	38953	13210	373
5	1.1	6_lobi	i	P14	65462	22413	757
5	1.1	7_lobii	ii	P14	44428	16931	249
5	1.1	8_lobiii	iii	P14	53979	25375	260
5	1.1	9_lobiii	iii	P14	47393	27429	683
5	1.1	10_lobiii	iii	P14	54237	15827	54
5	1.2	1_lobx	x	P14	45779	21195	464
5	1.2	2_lobx	x	P14	44412	19195	283
5	1.2	3_lobix	ix	P14	52559	21962	283
5	1.2	4_lobix	ix	P14	46165	16795	611
5	1.2	5_lobix	ix	P14	56897	16543	172
5	1.2	6_lobi	i	P14	35378	15562	122
5	1.2	7_lobii	ii	P14	41192	20206	425
5	1.2	8_lobiii	iii	P14	47473	23450	528
5	1.2	10_lobiii	iii	P14	50394	22101	242
5	1.3	1_lobx	x	P14	35316	9556	264
5	1.3	2_lobx	x	P14	21194	12179	631
5	1.3	3_lobix	ix	P14	28686	15766	514
5	1.3	4_lobix	ix	P14	27071	9275	386
5	1.3	5_lobix	ix	P14	27194	15803	427
5	1.3	6_lobi	i	P14	24998	13763	475
5	1.3	7_lobii	ii	P14	16286	10561	466
5	1.3	8_lobiii	iii	P14	26424	17984	643
5	1.3	9_lobiii	iii	P14	26793	15161	448
5	1.3	10_lobiii	iii	P14	22477	13974	517
5	1.4	1_lobx	x	P14	21207	7640	543
5	1.4	2_lobx	x	P14	17842	8220	296
5	1.4	3_lobix	ix	P14	28631	13491	269
5	1.4	4_lobix	ix	P14	20991	11056	614
5	1.4	5_lobix	ix	P14	25678	14063	288
5	1.4	6_lobi	i	P14	23505	15258	634
5	1.4	7_lobii	ii	P14	26654	15611	150
5	1.4	8_lobiii	iii	P14	26803	19861	625
5	1.4	9_lobiii	iii	P14	22691	11524	573
5	1.4	10_lobiii	iii	P14	23541	13135	323
6	1.1	1_lobx	x	P14	24506	8019	236
6	1.1	2_lobx	x	P14	28255	12706	591
6	1.1	3_lobix	ix	P14	34522	11078	497
6	1.1	4_lobix	ix	P14	33754	17863	668
6	1.1	5_lobix	ix	P14	38999	20839	793
6	1.1	6_lobi	i	P14	30089	13677	692
6	1.1	7_lobii	ii	P14	28713	18210	700
6	1.1	8_lobiii	iii	P14	29441	17657	573
6	1.1	9_lobiii	iii	P14	36713	26261	504
6	1.1	10_lobiii	iii	P14	32070	19628	652
6	1.2	1_lobx	x	P14	24743	13155	740
6	1.2	2_lobx	x	P14	30583	16352	745
6	1.2	3_lobix	ix	P14	33532	12709	517
6	1.2	4_lobix	ix	P14	31284	18318	769
6	1.2	5_lobix	ix	P14	38569	20417	856
6	1.2	6_lobi	i	P14	26311	14089	627
6	1.2	7_lobii	ii	P14	24662	14720	348
6	1.2	8_lobiii	iii	P14	32054	16552	587
6	1.2	9_lobiii	iii	P14	32253	18548	920
6	1.2	10_lobiii	iii	P14	38565	24548	1033
6	1.3	1_lobx	x	P14	26222	7302	266
6	1.3	2_lobx	x	P14	25044	10724	437
6	1.3	3_lobix	ix	P14	33349	18474	558
6	1.3	4_lobix	ix	P14	32757	11856	446
6	1.3	5_lobix	ix	P14	32072	16746	523
6	1.3	6_lobi	i	P14	25794	15676	563
6	1.3	7_lobii	ii	P14	23485	13957	582
6	1.3	8_lobiii	iii	P14	31814	23582	801
6	1.3	9_lobiii	iii	P14	30542	17241	675
6	1.3	10_lobiii	iii	P14	36903	24156	927
6	1.4	1_lobx	x	P14	21782	9759	492
6	1.4	2_lobx	x	P14	19929	9174	232
6	1.4	3_lobix	ix	P14	23776	12648	787
6	1.4	4_lobix	ix	P14	22923	12614	453
6	1.4	5_lobix	ix	P14	29007	18195	870
6	1.4	6_lobi	i	P14	23685	11898	283
6	1.4	7_lobii	ii	P14	25556	13579	304
6	1.4	8_lobiii	iii	P14	34020	21738	487
6	1.4	9_lobiii	iii	P14	33009	19976	446
6	1.4	10_lobiii	iii	P14	30542	26438	500
7	1.1	1_lobx	x	P21	27356	17084	263
7	1.1	2_lobx	x	P21	27538	16262	468
7	1.1	3_lobix	ix	P21	42155	30204	779
7	1.1	4_lobix	ix	P21	38588	25758	793
7	1.1	5_lobix	ix	P21	41829	28450	925
7	1.1	6_lobi	i	P21	47143	39019	1008
7	1.1	7_lobii	ii	P21	38604	30355	1054
7	1.1	8_lobiii	iii	P21	47712	38532	1202
7	1.1	9_lobiii	iii	P21	55551	41235	1165
7	1.1	10_lobiii	iii	P21	54207	43003	1447
7	1.2	1_lobx	x	P21	27308	16438	561
7	1.2	2_lobx	x	P21	29688	20534	486
7	1.2	3_lobix	ix	P21	42562	29498	795
7	1.2	4_lobix	ix	P21	46041	26294	849
7	1.2	5_lobix	ix	P21	39981	24054	567
7	1.2	6_lobi	i	P21	43543	34430	608
7	1.2	7_lobii	ii	P21	37597	26992	585
7	1.2	8_lobiii	iii	P21	55310	45284	1134
7	1.2	9_lobiii	iii	P21	57231	40025	559
7	1.2	10_lobiii	iii	P21	54658	39232	998
7	1.3	1_lobx	x	P21	28933	18768	406
7	1.3	2_lobx	x	P21	33513	19126	456
7	1.3	3_lobix	ix	P21	33295	22796	463
7	1.3	4_lobix	ix	P21	28167	19653	399
7	1.3	5_lobix	ix	P21	47269	31798	828
7	1.3	6_lobi	i	P21	41848	32034	706
7	1.3	7_lobii	ii	P21	33329	25045	704
7	1.3	8_lobiii	iii	P21	47754	38415	1241
7	1.3	9_lobiii	iii	P21	56265	40363	758
7	1.3	10_lobiii	iii	P21	48568	36656	791
7	1.4	1_lobx	x	P21	30943	22409	618
7	1.4	2_lobx	x	P21	23495	15101	344
7	1.4	3_lobix	ix	P21	35854	25415	505
7	1.4	4_lobix	ix	P21	34203	19465	417
7	1.4	5_lobix	ix	P21	50434	34874	759
7	1.4	6_lobi	i	P21	37267	25147	364
7	1.4	7_lobii	ii	P21	34926	23419	429
7	1.4	8_lobiii	iii	P21	47992	36456	658
7	1.4	9_lobiii	iii	P21	54027	36070	589
7	1.4	10_lobiii	iii	P21	47432	34318	814
8	1.1	1_lobx	x	P21	21095	13704	398
8	1.1	2_lobx	x	P21	24074	14976	242
8	1.1	3_lobix	ix	P21	34550	18523	402
8	1.1	4_lobix	ix	P21	20668	14666	219
8	1.1	5_lobix	ix	P21	42909	29302	368
8	1.1	6_lobi	i	P21	37141	20933	231
8	1.1	7_lobii	ii	P21	29464	22653	452
8	1.1	8_lobiii	iii	P21	50277	40115	579
8	1.1	9_lobiii	iii	P21	46479	32939	336
8	1.1	10_lobiii	iii	P21	43616	31624	557
8	1.2	1_lobx	x	P21	29872	15910	283
8	1.2	2_lobx	x	P21	38381	25708	350
8	1.2	3_lobix	ix	P21	50603	33834	550
8	1.2	4_lobix	ix	P21	39130	30240	520
8	1.2	5_lobix	ix	P21	54168	38238	977
8	1.2	6_lobi	i	P21	51866	33165	290
8	1.2	7_lobii	ii	P21	39637	26391	428
8	1.2	8_lobiii	iii	P21	47137	32840	535
8	1.2	9_lobiii	iii	P21	35927	19764	44
8	1.2	10_lobiii	iii	P21	43434	32064	411
8	1.3	1_lobx	x	P21	34724	21419	538
8	1.3	2_lobx	x	P21	34966	22174	900
8	1.3	3_lobix	ix	P21	45032	29168	582
8	1.3	4_lobix	ix	P21	49902	31833	895
8	1.3	5_lobix	ix	P21	34890	21500	500
8	1.3	6_lobi	i	P21	43608	30465	325
8	1.3	7_lobii	ii	P21	40663	28071	390
8	1.3	8_lobiii	iii	P21	44820	35178	779
8	1.3	9_lobiii	iii	P21	38380	21768	120
8	1.3	10_lobiii	iii	P21	48822	36255	481
8	1.4	1_lobx	x	P21	32335	20174	537
8	1.4	2_lobx	x	P21	34203	16963	212
8	1.4	3_lobix	ix	P21	44316	32293	631
8	1.4	4_lobix	ix	P21	35903	23466	363
8	1.4	5_lobix	ix	P21	38494	25342	312
8	1.4	6_lobi	i	P21	49588	25099	9
8	1.4	7_lobii	ii	P21	37450	18443	59
8	1.4	8_lobiii	iii	P21	27285	14402	77
8	1.4	9_lobiii	iii	P21	26632	18147	76
8	1.4	10_lobiii	iii	P21	24550	13501	50
8	1.4	11_lobiii	iii	P21	31279	19654	76
9	1.1	1_lobx	x	P21	28769	12531	131
9	1.1	2_lobx	x	P21	34856	22429	420
9	1.1	3_lobix	ix	P21	39501	29059	540
9	1.1	4_lobix	ix	P21	41952	29736	777
9	1.1	5_lobix	ix	P21	51351	31589	988
9	1.1	6_lobi	i	P21	41140	31382	658
9	1.1	7_lobii	ii	P21	38811	28234	300
9	1.1	8_lobiii	iii	P21	45133	33339	536
9	1.1	9_lobiii	iii	P21	41906	30246	747
9	1.1	10_lobiii	iii	P21	47551	33770	911
9	1.2	1_lobx	x	P21	24055	10430	237
9	1.2	2_lobx	x	P21	34599	17466	449
9	1.2	3_lobix	ix	P21	40826	24794	374
9	1.2	4_lobix	ix	P21	43366	30489	756
9	1.2	5_lobix	ix	P21	41378	25273	624
9	1.2	6_lobi	i	P21	42293	26886	230
9	1.2	7_lobii	ii	P21	28579	16559	313
9	1.2	8_lobiii	iii	P21	42487	28768	327
9	1.2	9_lobiii	iii	P21	28063	17854	231
9	1.3	1_lobx	x	P21	25327	10223	133
9	1.3	2_lobx	x	P21	33895	18345	349
9	1.3	3_lobix	ix	P21	34882	24552	586
9	1.3	4_lobix	ix	P21	44798	26573	745
9	1.3	5_lobix	ix	P21	47344	27357	727
9	1.3	6_lobi	i	P21	37283	27839	537
9	1.3	7_lobii	ii	P21	37644	28455	633
9	1.3	8_lobiii	iii	P21	39686	26120	653
9	1.3	9_lobiii	iii	P21	41550	27629	427
9	1.3	10_lobiii	iii	P21	44678	35806	619
9	1.4	1_lobx	x	P21	26604	12836	286
9	1.4	2_lobx	x	P21	24256	14054	216
9	1.4	3_lobix	ix	P21	31935	23850	527
9	1.4	4_lobix	ix	P21	28993	19661	535
9	1.4	5_lobix	ix	P21	21571	13465	153
9	1.4	6_lobi	i	P21	35972	24909	511
9	1.4	7_lobii	ii	P21	35126	23029	602
9	1.4	8_lobiii	iii	P21	48384	33213	619
9	1.4	9_lobiii	iii	P21	40673	25514	360
9	1.4	10_lobiii	iii	P21	42940	31295	478
10	1.1	1_lobx	x	P35	22064	17239	731
10	1.1	2_lobx	x	P35	35817	29552	1522
10	1.1	3_lobix	ix	P35	43563	33918	1647
10	1.1	4_lobix	ix	P35	40138	26683	1356
10	1.1	5_lobix	ix	P35	48288	41074	1849
10	1.1	6_lobiii	iiii	P35	46561	38597	2235
10	1.1	7_lobiii	iii	P35	47520	39107	2138
10	1.1	8_lobiii	iii	P35	60190	52229	2510
10	1.2	1_lobx	x	P35	27698	21273	998
10	1.2	2_lobx	x	P35	35887	27295	1222
10	1.2	3_lobix	ix	P35	48140	35931	1988
10	1.2	4_lobix	ix	P35	73910	58753	3098
10	1.2	5_lobix	ix	P35	47390	36661	1994
10	1.2	6_lobix	ix	P35	50678	43164	2475
10	1.2	7_lobi	i	P35	58225	48578	2654
10	1.2	8_lobii	ii	P35	61533	50781	2326
10	1.2	9_lobiii	iii	P35	58171	49842	2896
10	1.2	10_lobiii	iii	P35	59489	50479	2689
10	1.3	1_lobx	x	P35	30362	21279	1101
10	1.3	2_lobx	x	P35	40717	31696	1761
10	1.3	3_lobix	ix	P35	51387	38279	1722
10	1.3	4_lobix	ix	P35	53869	42155	2156
10	1.3	5_lobix	ix	P35	67062	50683	2637
10	1.3	6_lobi	i	P35	36617	29251	1983
10	1.3	7_lobii	ii	P35	54230	43578	2572
10	1.3	8_lobiii	iii	P35	47386	41130	2257
10	1.3	9_lobiii	iii	P35	31119	24306	1463
10	1.3	10_lobiii	iii	P35	56072	48152	2691
10	1.4	1_lobx	x	P35	36208	24403	1320
10	1.4	2_lobx	x	P35	45941	33049	1723
10	1.4	3_lobix	ix	P35	46628	36913	1731
10	1.4	4_lobix	ix	P35	58164	45150	1992
10	1.4	5_lobix	ix	P35	45724	32767	1696
10	1.4	6_lobi	i	P35	49570	39602	2221
10	1.4	7_lobii	ii	P35	54035	42151	2267
10	1.4	8_lobiii	iii	P35	61463	48716	2272
10	1.4	9_lobiii	iii	P35	56018	44427	2030
10	1.4	10_lobiii	iii	P35	63916	53241	3126
11	1.1	1_lobx	x	P35	37404	28193	1572
11	1.1	2_lobx	x	P35	30952	20630	1116
11	1.1	3_lobix	ix	P35	45655	36724	1862
11	1.1	4_lobix	ix	P35	50804	40257	1965
11	1.1	5_lobix	ix	P35	40614	31942	1966
11	1.1	6_lobi	i	P35	58465	51466	2875
11	1.1	7_lobii	ii	P35	47999	40979	2469
11	1.1	8_lobiii	iii	P35	58322	51526	2858
11	1.1	9_lobiii	iii	P35	43520	36323	2069
11	1.1	10_lobiii	iii	P35	48216	40110	2095
11	1.2	1_lobx	x	P35	24386	18890	1061
11	1.2	2_lobx	x	P35	21639	15974	796
11	1.2	3_lobix	ix	P35	38679	28614	1290
11	1.2	4_lobix	ix	P35	44410	32420	1146
11	1.2	5_lobix	ix	P35	45193	34282	1802
11	1.2	6_lobi	i	P35	40769	34874	2215
11	1.2	7_lobii	ii	P35	11408	9339	510
11	1.2	8_lobiii	iii	P35	25621	19511	1133
11	1.2	9_lobiii	iii	P35	50224	49157	2713
11	1.2	10_lobiii	iii	P35	67403	54312	2561
11	1.3	1_lobx	x	P35	36388	27434	1472
11	1.3	2_lobx	x	P35	51687	38064	2204
11	1.3	3_lobix	ix	P35	59451	46817	2367
11	1.3	4_lobix	ix	P35	51093	35668	1438
11	1.3	5_lobi	i	P35	49480	41260	1874
11	1.3	6_lobii	ii	P35	57372	46281	2803
11	1.3	7_lobii	ii	P35	54481	44429	2584
11	1.3	8_lobiii	iii	P35	55392	46440	2840
11	1.3	9_lobiii	iii	P35	37260	29771	1633
11	1.3	10_lobiii	iii	P35	51790	39978	2420
11	1.4	1_lobx	x	P35	59068	51717	2611
11	1.4	2_lobx	x	P35	60276	45797	2374
11	1.4	3_lobix	ix	P35	37109	29805	1721
11	1.4	4_lobix	ix	P35	42112	33171	1593
11	1.4	5_lobix	ix	P35	68616	58810	2951
11	1.4	6_lobi	i	P35	40614	30198	1565
11	1.4	7_lobii	ii	P35	34552	29472	1739
11	1.4	8_lobiii	iii	P35	34839	28165	1742
11	1.4	9_lobiii	iii	P35	45531	37555	2409
11	1.4	10_lobiii	iii	P35	48043	44302	2558
12	1.1	1_lobx	x	P35	54144	44369	2633
12	1.1	2_lobx	x	P35	37409	29736	1986
12	1.1	3_lobix	ix	P35	51494	39707	2158
12	1.1	4_lobix	ix	P35	63785	49280	2148
12	1.1	5_lobix	ix	P35	58161	45330	1399
12	1.1	6_lobi	i	P35	43544	36218	1887
12	1.1	7_lobii	ii	P35	30425	20780	662
12	1.1	8_lobiii	iii	P35	33308	24616	865
12	1.1	9_lobiii	iii	P35	35177	27120	678
12	1.1	10_lobiii	iii	P35	46690	38737	1056
12	1.2	1_lobx	x	P35	34684	23984	864
12	1.2	2_lobx	x	P35	38889	28141	942
12	1.2	3_lobix	ix	P35	47556	33082	582
12	1.2	4_lobix	ix	P35	51161	38521	1119
12	1.2	5_lobix	ix	P35	49729	37069	1119
12	1.2	6_lobi	i	P35	49162	37656	807
12	1.2	7_lobii	ii	P35	44681	30086	260
12	1.2	8_lobiii	iii	P35	50117	27940	303
12	1.2	9_lobiii	iii	P35	47612	30578	360
12	1.2	10_lobiii	iii	P35	56415	41374	864
12	1.3	1_lobx	x	P35	38388	28087	1156
12	1.3	2_lobx	x	P35	41496	32406	1275
12	1.3	3_lobix	ix	P35	49787	37889	721
12	1.3	4_lobix	ix	P35	39795	31358	1284
12	1.3	5_lobi	i	P35	60861	43723	1014
12	1.3	6_lobii	ii	P35	48408	38519	1172
12	1.3	7_lobii	ii	P35	54865	43367	696
12	1.3	8_lobiii	iii	P35	57548	41592	725
12	1.3	9_lobiii	iii	P35	44533	29934	216
12	1.3	10_lobiii	iii	P35	55474	41489	502
12	1.4	1_lobx	x	P35	34315	25381	1035
12	1.4	2_lobx	x	P35	41859	31527	1164
12	1.4	3_lobix	ix	P35	52375	38604	1015
12	1.4	4_lobix	ix	P35	40876	30993	1178
12	1.4	5_lobix	ix	P35	29953	21140	1217
12	1.4	6_lobi	i	P35	35467	25688	1020
12	1.4	7_lobii	ii	P35	16541	13450	414
12	1.4	8_lobiii	iii	P35	28531	17652	247
12	1.4	9_lobiii	iii	P35	40402	32889	749
12	1.4	10_lobiii	iii	P35	60103	43576	754
13	1.1	1_lobx	x	P60	30705	20364	676
13	1.1	2_lobx	x	P60	29076	21851	801
13	1.1	3_lobix	ix	P60	40836	33728	1217
13	1.1	4_lobix	ix	P60	40102	25992	637
13	1.1	5_lobix	ix	P60	47423	38790	1291
13	1.1	6_lobi	i	P60	51561	46616	2253
13	1.1	7_lobii	ii	P60	43842	34685	1757
13	1.1	8_lobiii	iii	P60	38722	33115	1666
13	1.1	9_lobiii	iii	P60	43930	36710	1726
13	1.1	10_lobiii	iii	P60	56336	47957	2597
13	1.2	1_lobx	x	P60	32482	22153	1487
13	1.2	2_lobx	x	P60	35503	32467	1241
13	1.2	3_lobix	ix	P60	56656	48695	2518
13	1.2	4_lobix	ix	P60	48643	38979	1532
13	1.2	5_lobix	ix	P60	62851	52822	2175
13	1.2	6_lobi	i	P60	57645	43840	2626
13	1.2	7_lobii	ii	P60	52651	35826	2087
13	1.2	8_lobii	ii	P60	52567	46197	2327
13	1.2	9_lobiii	iii	P60	61758	51048	2177
13	1.2	10_lobiii	iii	P60	64661	56544	2407
13	1.3	1_lobx	x	P60	32031	23145	564
13	1.3	2_lobx	x	P60	38308	29627	917
13	1.3	3_lobix	ix	P60	48173	36413	1323
13	1.3	4_lobix	ix	P60	39923	30396	1207
13	1.3	5_lobix	ix	P60	51825	42198	1283
13	1.3	6_lobi	i	P60	49528	36438	635
13	1.3	7_lobii	ii	P60	46961	40557	1469
13	1.3	8_lobii	ii	P60	59129	50841	1572
13	1.3	9_lobiii	iii	P60	40964	30747	579
13	1.3	10_lobiii	iii	P60	64476	53254	1888
13	1.4	1_lobx	x	P60	28801	20290	280
13	1.4	2_lobx	x	P60	25848	21053	407
13	1.4	3_lobix	ix	P60	38861	32691	866
13	1.4	4_lobix	ix	P60	38973	33671	1393
13	1.4	5_lobix	ix	P60	39644	31753	558
13	1.4	6_lobi	i	P60	37663	30888	853
13	1.4	7_lobii	ii	P60	37037	28727	840
13	1.4	8_lobiii	iii	P60	57863	50792	1372
13	1.4	9_lobiii	iii	P60	54490	43541	394
13	1.4	10_lobiii	iii	P60	53388	45673	845
14	1.1	1_lobx	x	P60	35449	31964	1792
14	1.1	2_lobx	x	P60	30659	27064	1412
14	1.1	3_lobix	ix	P60	50554	41886	1558
14	1.1	4_lobix	ix	P60	44514	34728	1007
14	1.1	5_lobix	ix	P60	37489	30960	963
14	1.1	6_lobi	i	P60	33366	24999	1031
14	1.1	7_lobii	ii	P60	42067	34285	1706
14	1.1	8_lobiii	iii	P60	54350	41076	1573
14	1.1	9_lobiii	iii	P60	59915	45380	2119
14	1.1	10_lobiii	iii	P60	58206	50365	2304
14	1.2	1_lobx	x	P60	44124	31277	1097
14	1.2	2_lobx	x	P60	36372	26594	907
14	1.2	3_lobix	ix	P60	45525	39574	1282
14	1.2	4_lobix	ix	P60	60326	51987	2217
14	1.2	5_lobix	ix	P60	55572	43814	1797
14	1.2	6_lobi	i	P60	63035	52887	2781
14	1.2	7_lobii	ii	P60	44143	38881	2203
14	1.2	8_lobii	ii	P60	52005	44641	2004
14	1.2	9_lobiii	iii	P60	59716	52570	2127
14	1.2	10_lobiii	iii	P60	64016	49385	1123
14	1.3	1_lobx	x	P60	35576	23350	890
14	1.3	2_lobx	x	P60	35522	26670	1249
14	1.3	3_lobix	ix	P60	50391	43483	2216
14	1.3	4_lobix	ix	P60	67223	47415	2029
14	1.3	5_lobix	ix	P60	47244	34989	1403
14	1.3	6_lobi	i	P60	56079	46099	1781
14	1.3	7_lobii	ii	P60	46153	34975	1436
14	1.3	8_lobii	ii	P60	44951	37093	1932
14	1.3	9_lobiii	iii	P60	60434	50624	2448
14	1.3	10_lobiii	iii	P60	47161	39292	1647
14	1.4	1_lobx	x	P60	31629	27237	1625
14	1.4	2_lobx	x	P60	43057	32790	1113
14	1.4	3_lobix	ix	P60	48560	42058	1003
14	1.4	4_lobix	ix	P60	62826	48585	1166
14	1.4	5_lobix	ix	P60	54461	39073	892
14	1.4	6_lobi	i	P60	55320	45908	1369
14	1.4	7_lobii	ii	P60	45921	39958	1259
14	1.4	8_lobiii	iii	P60	61448	50921	939
14	1.4	9_lobiii	iii	P60	62569	47065	548
14	1.4	10_lobiii	iii	P60	65993	56689	1350
15	1.1	1_lobx	x	P60	26541	22393	532
15	1.1	2_lobx	x	P60	27532	23103	690
15	1.1	3_lobix	ix	P60	37361	32092	1104
15	1.1	4_lobix	ix	P60	21750	17136	469
15	1.1	5_lobix	ix	P60	24020	16257	436
15	1.1	6_lobi	i	P60	37110	28102	1200
15	1.1	7_lobii	ii	P60	44191	35112	898
15	1.1	8_lobiii	iii	P60	42519	32424	992
15	1.1	9_lobiii	iii	P60	58375	46516	1350
15	1.1	10_lobiii	iii	P60	30166	24627	1392
15	1.2	1_lobx	x	P60	38213	21882	835
15	1.2	2_lobx	x	P60	43239	30137	1080
15	1.2	3_lobix	ix	P60	44664	39983	1363
15	1.2	4_lobix	ix	P60	49676	27603	1067
15	1.2	5_lobix	ix	P60	37721	31979	1205
15	1.2	6_lobi	i	P60	47128	38613	1576
15	1.2	7_lobii	ii	P60	38357	32535	1132
15	1.2	8_lobii	ii	P60	49898	39344	893
15	1.2	9_lobiii	iii	P60	52023	40475	723
15	1.2	10_lobiii	iii	P60	56729	47956	1571
15	1.3	1_lobx	x	P60	40441	33673	1798
15	1.3	2_lobx	x	P60	43462	34552	1520
15	1.3	3_lobix	ix	P60	49051	41563	1151
15	1.3	4_lobix	ix	P60	50703	39626	1324
15	1.3	5_lobix	ix	P60	62346	44459	925
15	1.3	6_lobi	i	P60	43099	32548	402
15	1.3	7_lobii	ii	P60	48213	36145	1236
15	1.3	8_lobii	ii	P60	53193	42471	910
15	1.3	9_lobiii	iii	P60	58282	44999	665
15	1.3	10_lobiii	iii	P60	53666	43548	1600
15	1.4	1_lobx	x	P60	43901	37517	2739
15	1.4	2_lobx	x	P60	47744	34789	1215
15	1.4	3_lobix	ix	P60	56092	43140	1416
15	1.4	4_lobix	ix	P60	51286	38817	765
15	1.4	5_lobix	ix	P60	63240	51893	1282
15	1.4	6_lobi	i	P60	45427	39780	1233
15	1.4	7_lobii	ii	P60	59558	48444	1450
15	1.4	8_lobiii	iii	P60	70839	59031	1713
15	1.4	9_lobiii	iii	P60	62017	49644	1396
15	1.4	10_lobiii	iii	P60	67902	57161	1698
