# Supplementary material for: Differential spatiotemporal development of Purkinje cell populations and cerebellum-dependent sensorimotor behaviors
Source: eLife. 2021 May 11;10:e63668. doi: 10.7554/eLife.63668 (PMC8195607; doi:10.7554/eLife.63668)
Supplement: Figure 4—source data 2. [file elife-63668-fig4-data2.xlsx]

## Sheet: Sheet1
					Molecular layer thickness			Climbing fiber height
Animal	Slide	Name	Lobule	Age	Measurement 1	Measurement 2	Measurement 3	Measurement 1	Measurement 2	Measurement 3
1	1.1	1_lobx	x	P7	42.384	33.83	31.072	32.903	30.971	26.636
1	1.1	2_lobx	x	P7	23.14	16.067	15.007	19.631	13.266	10.692
1	1.1	3_lobix	ix	P7	25.51	24.201	34.955	20.144	22.716	32.491
1	1.1	4_lobix	ix	P7	29.124	27.224	27.065	22.928	22.456	22.29
1	1.1	5_lobix	ix	P7	34.82	35.81	37.27	26.11	25.8	27.05
1	1.1	6_lobi	i	P7	14.13	14.21	12.83	2.28	2.88	0.44
1	1.1	7_lobii	ii	P7	13.42	15.04	20.03	2.1	2.97	1.33
1	1.1	8_lobiii	iii	P7	19.19	16.43	21	0.44	1.82	0.44
1	1.1	9_lobiii	iii	P7	17.6	16.5	14.21	7.89	4.51	5.64
1	1.1	10_lobiii	iii	P7	28.45	27.96	15.88	1.13	1.13	3.19
1	1.2	1_lobx	x	P7	34.7	42.9	42.62	27.54	37.37	37.77
1	1.2	2_lobx	x	P7	41.55	26.72	22.9	37.38	25.3	22.57
1	1.2	3_lobix	ix	P7	23.68	22.41	27.6	20.28	16.38	21.16
1	1.2	4_lobix	ix	P7	27.44	33.04	26.02	24.98	31.65	23.69
1	1.2	5_lobix	ix	P7	20.63	23.79	30.84	10.01	15.95	22.72
1	1.2	6_lobi	i	P7	17.7	11.8	10.76	0.44	1.13	0.88
1	1.2	7_lobii	ii	P7	14.12	8.69	13.09	0.7	1.59	1.13
1	1.2	8_lobiii	iii	P7	21.02	8.45	13.62	1.13	0.63	1.4
1	1.2	9_lobiii	iii	P7	11.63	15.44	9.09	3.54	0.7	0.94
1	1.2	10_lobiii	iii	P7	10.99	11.98	9.99	1.13	0.31	0
1	1.3	1_lobx	x	P7	26.89	25.61	21.88	25.15	23.16	20.15
1	1.3	2_lobx	x	P7	19.73	20.95	22.97	15.29	16.7	21.26
1	1.3	3_lobix	ix	P7	22.2	20.2	25.49	19.77	14.14	23.76
1	1.3	4_lobix	ix	P7	21.63	26.38	29.22	17.19	22.64	23.69
1	1.3	5_lobix	ix	P7	37.27	38.77	35.01	26.98	30.02	27.84
1	1.3	6_lobi	i	P7	22.2	25.17	23.96	1.25	0.88	7.82
1	1.3	7_lobii	ii	P7	19.73	28.42	21.88	1.59	0.63	1.56
1	1.3	8_lobiii	iii	P7	18.32	20.32	23.89	0.88	0.7	0
1	1.3	9_lobiii	iii	P7	22.55	13.04	23.03	0	0	12.89
1	1.3	10_lobiii	iii	P7	27.18	22.95	22.51	1.56	1.59	1.29
1	1.4	1_lobx	x	P7	26.44	22.61	21.88	22.8	22.41	5.38
1	1.4	2_lobx	x	P7	26.97	20.56	22.41	22.78	17.9	20.12
1	1.4	3_lobix	ix	P7	31.32	33.86	37.46	27.26	30.54	29.23
1	1.4	4_lobix	ix	P7	30.79	36.2	41.42	21.46	30.36	35.71
1	1.4	5_lobix	ix	P7	33.76	35.37	38.02	25.01	27.1	31.39
1	1.4	6_lobi	i	P7	21.37	22.29	24.7	8.25	0.94	11.89
1	1.4	7_lobii	ii	P7	21.64	21.94	19.38	1.9	6.38	1.68
1	1.4	8_lobiii	iii	P7	22.25	26.89	25.68	0.7	0	0.88
1	1.4	9_lobiii	iii	P7	24.38	19.15	21.96	1.68	6.44	5.84
1	1.4	10_lobiii	iii	P7	20.04	10.24	22.38	0	4.25	3.37
2	1.1	1_lobx	x	P7	36.62	28.73	25.49	29.26	26.85	22.66
2	1.1	2_lobx	x	P7	22.8	18.45	40.04	19.89	14.61	39.13
2	1.1	3_lobix	ix	P7	23.36	36.02	30.72	17.2	25.63	22.58
2	1.1	4_lobix	ix	P7	22.68	16.5	22.61	17.47	12.89	14.29
2	1.1	5_lobix	ix	P7	22.84	34.9	37.05	22.34	33.92	26.99
2	1.1	6_lobi	i	P7	25.15	19.73	23.23	2.65	1.29	0.94
2	1.1	7_lobii	ii	P7	19.4	16.05	20.32	1.13	1.25	0.7
2	1.1	8_lobiii	iii	P7	19.59	23.09	22.12	1.48	2.1	4.9
2	1.1	9_lobiii	iii	P7	26.83	25.41	23.17	7.98	0.66	1.69
2	1.1	10_lobiii	iii	P7	19.22	20.21	21.59	3.78	0.47	1.33
2	1.2	1_lobx	x	P7	39.32	33.51	34.46	30.92	27.73	26.73
2	1.2	2_lobx	x	P7	24.55	22.04	21.23	18.45	16.46	13.92
2	1.2	3_lobix	ix	P7	29.82	29.52	22.55	23.72	23.82	16.47
2	1.2	4_lobix	ix	P7	43.63	32.85	28.35	33.45	27.76	25.13
2	1.2	5_lobix	ix	P7	33.66	41.27	36.54	27	41.27	27.05
2	1.2	6_lobi	i	P7	18.81	20.18	18.5	3.41	2.1	1.69
2	1.2	7_lobii	ii	P7	21.07	20.2	16.58	6.92	5.24	1.33
2	1.2	8_lobiii	iii	P7	23.55	20.81	19.77	1.05	0.66	1.88
2	1.2	9_lobiii	iii	P7	21.35	28.11	20.03	1.05	0	1.05
2	1.2	10_lobiii	iii	P7	22.68	22.16	19.9	0.47	1.41	1.48
2	1.3	1_lobx	x	P7	34.58	43.15	31.18	28.94	33.53	25.48
2	1.3	2_lobx	x	P7	21.02	21.1	24.32	18.38	15.1	18.1
2	1.3	3_lobix	ix	P7	32.16	33.81	29.35	26.99	26.36	22.07
2	1.3	4_lobix	ix	P7	27.81	24.12	24.35	20.97	19.39	17.34
2	1.3	5_lobix	ix	P7	44.18	48.88	37.7	43.2	30.55	33.62
2	1.3	6_lobi	i	P7	25.75	30.36	27.4	1.13	1.29	0.7
2	1.3	7_lobii	ii	P7	22.1	20.87	25.08	0.94	0.63	1.9
2	1.3	8_lobiii	iii	P7	21.71	15.16	24.58	0.44	1.82	1.56
2	1.3	9_lobiii	iii	P7	21.96	23.34	17.82	17.82	0.63	0.31
2	1.3	10_lobiii	iii	P7	22.87	24.74	24.08	1.9	0.94	1.4
2	1.4	1_lobx	x	P7	23.15	21.26	19.08	19.44	17.52	14.1
2	1.4	2_lobx	x	P7	29.48	18.01	28.31	22.03	16.38	24.76
2	1.4	3_lobix	ix	P7	27.26	30.63	27.4	19.94	19.7	22.79
2	1.4	4_lobix	ix	P7	27.96	27.19	18.42	20.35	21.56	14.04
2	1.4	5_lobix	ix	P7	17.53	17.78	22.94	14.42	10.96	14.69
2	1.4	6_lobi	i	P7	20.95	21.05	21.11	1.33	4.69	0.99
2	1.4	7_lobii	ii	P7	17.06	22.51	22.53	6.44	0.44	3.49
2	1.4	8_lobiii	iii	P7	22.38	33.23	30.79	0	4.89	0.7
2	1.4	9_lobiii	iii	P7	10.39	19.25	22.79	3.82	8.85	7.41
2	1.4	10_lobiii	iii	P7	24.4	23.61	22.54	1.56	1.59	1.56
3	1.1	1_lobx	x	P7	23.52	24.41	23.92	16.09	23.79	19.19
3	1.1	2_lobx	x	P7	30.58	26.75	26.14	27.67	24.54	25.5
3	1.1	3_lobix	ix	P7	53.39	33.85	30.06	46	30.29	20.12
3	1.1	4_lobix	ix	P7	54.22	29.68	35.98	38.21	22.58	31.79
3	1.1	5_lobix	ix	P7	35.15	40.96	37.22	24.17	31.57	28.16
3	1.1	6_lobi	i	P7	29.67	28.47	30.49	2.97	4.94	0.44
3	1.1	7_lobii	ii	P7	34.35	24.62	27.45	0.94	2.58	1.77
3	1.1	8_lobiii	iii	P7	30.2	26.79	22.61	6.14	1.4	1.68
3	1.1	9_lobiii	iii	P7	27.09	23.67	25.23	2.52	2.38	1.9
3	1.1	10_lobiii	iii	P7	29.36	24.21	26.17	1.25	0.44	0.99
3	1.2	1_lobx	x	P7	14.34	19.04	25.01	11.77	14.82	20.01
3	1.2	2_lobx	x	P7	19.01	26.56	16.79	16.5	21.7	16.79
3	1.2	3_lobix	ix	P7	18.15	47.97	25.14	10.5	38.75	20.82
3	1.2	4_lobix	ix	P7	42	35.94	30.49	32.04	25.86	20.7
3	1.2	5_lobix	ix	P7	37.87	34.08	29.07	26.88	24.07	22.25
3	1.2	6_lobi	i	P7	27.72	34.32	31.64	8.5	3.32	0.63
3	1.2	7_lobii	ii	P7	25.46	30.45	28.02	0.7	0.44	1.13
3	1.2	8_lobiii	iii	P7	29.7	18.45	25.94	1.77	0.31	0.7
3	1.2	9_lobiii	iii	P7	27.23	25.76	23.23	1.29	0.63	1.98
3	1.2	10_lobiii	iii	P7	26.75	20.64	30.01	2.88	0.88	1.29
3	1.3	1_lobx	x	P7	27.83	18.35	19.29	24.14	13.73	15.39
3	1.3	2_lobx	x	P7	21.14	17.29	21.73	19.05	16.65	17.73
3	1.3	3_lobix	ix	P7	23.66	49.76	29.39	20.8	47.7	27.76
3	1.3	4_lobix	ix	P7	26.99	25.33	20.66	19.8	15.16	18.68
3	1.3	5_lobix	ix	P7	11.01	12.86	12.91	2.97	8.15	8.89
3	1.3	6_lobi	i	P7	9.46	27.78	18.13	3.45	5.04	0.63
3	1.3	7_lobii	iii	P7	24.34	16.91	19.45	2.28	0.44	1.29
3	1.3	8_lobiii	iii	P7	10.01	12.39	17.21	0.63	3.14	0.7
3	1.4	1_lobx	x	P7	36.77	13.14	26.57	29.48	11.62	20.59
3	1.4	2_lobx	x	P7	19.67	23.45	27.22	13.27	22.12	23.76
3	1.4	3_lobix	ix	P7	28.38	27.14	42.22	23.21	23.59	31.46
3	1.4	4_lobix	ix	P7	32.51	23.28	27.92	25.9	24.38	23.23
3	1.4	5_lobix	ix	P7	39.12	33.38	25.33	29.8	29.62	20.01
3	1.4	6_lobi	i	P7	32.82	31.35	22.14	3.32	0.7	13.71
3	1.4	7_lobii	ii	P7	23.16	25.32	24.12	1.4	0	0.7
3	1.4	8_lobiii	iii	P7	20.75	24.73	26.11	0.88	0.31	6.29
3	1.4	9_lobiii	iii	P7	24.02	26.07	19.03	2.1	6.23	6
3	1.4	10_lobiii	iii	P7	23.76	27.24	21.92	0.99	0.44	0.99
4	1.1	2_lobx	x	P14	114.56	109.54	94.5	63.12	63.62	46.64
4	1.1	3_lobix	ix	P14	116.73	123.89	131.4	53.14	49.82	40.63
4	1.1	4_lobix	ix	P14	146.67	138.86	131.48	71.32	64.65	63.52
4	1.1	5_lobix	ix	P14	136.36	128.21	136.59	72.28	67.64	77.48
4	1.1	6_lobi	i	P14	93.12	94.42	99.22	51.02	47.74	65.29
4	1.1	7_lobii	ii	P14	98.07	99.1	91.71	62.12	59.52	59.09
4	1.1	8_lobiii	iii	P14	83.29	92.83	95.92	35.98	54.78	56.78
4	1.1	9_lobiii	iii	P14	62.58	72.49	73.22	33.9	48.84	56.97
4	1.1	10_lobiii	iii	P14	105.45	126.83	102.37	71.54	85.34	91.07
4	1.2	1_lobx	x	P14	92.71	86.9	88.18	45.58	40.89	44.07
4	1.2	2_lobx	x	P14	97.35	94.08	95.66	37.63	43.64	42.94
4	1.2	3_lobix	ix	P14	123.27	121.77	123.78	64.66	81.26	88.5
4	1.2	4_lobix	ix	P14	119.92	117.25	96.3	85.5	70.58	66.32
4	1.2	5_lobix	ix	P14	123.59	106.66	114.12	89.1	64.85	64.61
4	1.2	6_lobi	i	P14	93.5	98.36	93.46	66.76	65.01	55.8
4	1.2	7_lobii	ii	P14	81.85	87.79	78.98	52.02	68.46	46.94
4	1.2	8_lobiii	iii	P14	77.59	103.85	105.5	51.46	74.4	59.14
4	1.2	9_lobiii	iii	P14	91.19	103.53	102.05	69.34	50.75	66.12
4	1.2	10_lobiii	iii	P14	113.84	119.39	120.84	75.26	80.8	81.06
4	1.3	1_lobx	x	P14	93.94	86.02	85.5	46.33	49.39	47.19
4	1.3	2_lobx	x	P14	74.8	66.87	55.58	34.71	39.95	30.62
4	1.3	3_lobix	ix	P14	82.96	100.05	100.58	48.91	61.11	44.87
4	1.3	4_lobix	ix	P14	98.79	87.62	75.34	53.61	48.17	41.01
4	1.3	5_lobix	ix	P14	105.8	82.84	81.67	84.73	46.6	56.61
4	1.3	6_lobi	i	P14	97.47	95.74	95.65	64.37	64.09	68.24
4	1.3	7_lobii	ii	P14	62.6	81.36	69.72	47.01	55.65	36.28
4	1.3	8_lobiii	iii	P14	116.47	98.44	102.86	67.08	55.11	62.69
4	1.3	9_lobiii	iii	P14	79.9	93.11	79.31	61.29	59.82	47
4	1.3	10_lobiii	iii	P14	82.49	87.49	78.59	52.23	52.23	45.74
4	1.4	1_lobx	x	P14	96.4	86.64	95.66	45	46.46	74.27
4	1.4	2_lobx	x	P14	113.36	122.83	91.49	50.4	66.36	49.4
4	1.4	3_lobix	ix	P14	126.84	126.88	120.51	65.54	62.52	70.53
4	1.4	4_lobix	ix	P14	123.42	135.04	173.04	73.62	89.11	102.22
4	1.4	5_lobix	ix	P14	128.18	132.51	162.48	67.18	76.4	101.88
4	1.4	6_lobi	i	P14	88.83	97.48	117.73	53.16	67.02	69.63
4	1.4	7_lobii	ii	P14	84.92	104.8	102.47	51.44	59.46	66.36
4	1.4	8_lobiii	iii	P14	105.79	128.36	116.38	68.37	96.02	80.93
4	1.4	9_lobiii	iii	P14	106.4	112.17	98.4	62.88	70.19	68.17
4	1.4	10_lobiii	iii	P14	136.52	138.24	131.52	81.63	85.91	82.76
5	1.1	1_lobx	x	P14	118.7	90.81	103.5	72.46	49.84	49.49
5	1.1	2_lobx	x	P14	112.92	85.56	101.41	62.64	44.23	60.57
5	1.1	3_lobix	ix	P14	118.18	117.28	101.52	60.88	63.56	56.86
5	1.1	4_lobix	ix	P14	95.87	129.11	123.02	45.28	76.89	74.67
5	1.1	5_lobix	ix	P14	95.45	88.25	86.95	42.15	45.73	57.13
5	1.1	6_lobi	i	P14	123.97	108.42	107.67	72.42	75.67	59.05
5	1.1	7_lobii	ii	P14	109.91	121.41	118.47	61.65	77.59	65.64
5	1.1	8_lobiii	iii	P14	121.59	119.1	100.24	57.74	85.45	66.02
5	1.1	9_lobiii	iii	P14	120.5	109.82	100.83	76.03	85.35	75.96
5	1.1	10_lobiii	iii	P14	105.34	121.37	127.04	60.25	62.19	85.44
5	1.2	1_lobx	x	P14	90.23	94.83	75.5	47.83	53.73	43.35
5	1.2	2_lobx	x	P14	109.11	99.04	99.12	48.51	57.52	51.5
5	1.2	3_lobix	ix	P14	114.52	131.16	138.35	58.52	88.13	70.84
5	1.2	4_lobix	ix	P14	104.29	86.42	85.35	63.77	50.02	53.33
5	1.2	5_lobix	ix	P14	117.04	138.31	131.96	44.51	104.04	98.46
5	1.2	6_lobi	i	P14	87.93	89.68	77.47	49.54	52.68	46.13
5	1.2	7_lobii	ii	P14	93.56	113.1	123.83	47.16	63.7	69.84
5	1.2	8_lobiii	iii	P14	115.07	123.7	120.84	68.57	84.7	72.28
5	1.2	10_lobiii	iii	P14	129.06	130.44	121.63	61.02	70.35	76.36
5	1.3	1_lobx	x	P14	84.22	79.2	93.63	53.62	39.85	48.1
5	1.3	2_lobx	x	P14	76.06	68.08	79.2	37.3	48.66	48.52
5	1.3	3_lobix	ix	P14	92.97	106.36	113.87	60.7	38.45	63.29
5	1.3	4_lobix	ix	P14	76.75	76.65	72.76	76.75	70.47	53.97
5	1.3	5_lobix	ix	P14	106.9	102.85	101.97	60.03	62.25	95.77
5	1.3	6_lobi	i	P14	66.84	73.04	62.77	48.66	50.72	43.84
5	1.3	7_lobii	ii	P14	73.19	72.87	49.53	47.3	54.09	35.64
5	1.3	8_lobiii	iii	P14	106.61	116.57	108.96	81.23	80.92	74.45
5	1.3	9_lobiii	iii	P14	83.63	107.82	89.93	55.93	56.83	57.36
5	1.3	10_lobiii	iii	P14	56.95	78.57	88.87	32.6	61.4	65.77
5	1.4	1_lobx	x	P14	98.68	58.08	59.82	86.14	58.08	59.82
5	1.4	2_lobx	x	P14	63.85	74.39	76.61	46.18	59.04	37.15
5	1.4	3_lobix	ix	P14	87.65	101.63	102.65	86.15	57.69	71.13
5	1.4	4_lobix	ix	P14	73.05	77.76	85.96	56.65	65.98	70.1
5	1.4	5_lobix	ix	P14	101.35	101.98	109.34	45.89	46.58	57.96
5	1.4	6_lobi	i	P14	65.18	68.08	94.8	46.37	46.95	64.75
5	1.4	7_lobii	ii	P14	96.64	95.68	103.47	62.56	57.83	63.14
5	1.4	8_lobiii	iii	P14	87.59	96.24	96.46	51.26	62.24	72.63
5	1.4	9_lobiii	iii	P14	101.46	100.28	106.48	54.61	73.13	77.64
5	1.4	10_lobiii	iii	P14	81.98	83.51	83.77	31.31	39.01	44.35
6	1.1	1_lobx	x	P14	85.29	100.27	97.88	77.67	94.84	94.54
6	1.1	2_lobx	x	P14	112.92	109.15	93.16	48.99	92.66	90.42
6	1.1	3_lobix	ix	P14	123.72	121.2	121.72	118.41	113.79	112.83
6	1.1	4_lobix	ix	P14	114.37	116.15	121.75	108.1	65.28	114.38
6	1.1	5_lobix	ix	P14	150.19	163.4	152.49	65.71	90.19	71.8
6	1.1	6_lobi	i	P14	84.73	87.92	88.17	49.84	43.99	63.86
6	1.1	7_lobii	ii	P14	100.42	103.85	105.23	51.32	57.01	60.46
6	1.1	8_lobiii	iii	P14	106.31	118.03	110.62	65.32	63.57	55.96
6	1.1	9_lobiii	iii	P14	130.94	135.43	135.91	91.9	91.61	92.61
6	1.1	10_lobiii	iii	P14	116.09	127.46	120.07	62.19	69.27	65.19
6	1.2	1_lobx	x	P14	106.43	81.67	81.59	106.47	81.67	81.59
6	1.2	2_lobx	x	P14	111.9	108.96	103.62	53.71	62.28	83.04
6	1.2	3_lobix	ix	P14	89.72	112.09	131.14	83.48	91.9	65.78
6	1.2	4_lobix	ix	P14	103.44	115.24	115.11	97.31	111.45	111.27
6	1.2	5_lobix	ix	P14	140.88	167.45	156.85	74.17	76.04	72.85
6	1.2	6_lobi	i	P14	88.03	80.36	78.69	70.26	68.5	62.21
6	1.2	7_lobii	ii	P14	98.9	91.04	82.38	50.86	46.69	45.33
6	1.2	8_lobiii	iii	P14	131.21	104.29	128.95	57.87	53.71	70.65
6	1.2	9_lobiii	iii	P14	82.94	98.79	95.22	59.81	51.44	64.58
6	1.2	10_lobiii	iii	P14	132.47	149.5	136.23	89.05	88.22	77.42
6	1.3	1_lobx	x	P14	104.63	78.33	79.13	104.63	78.33	63.49
6	1.3	2_lobx	x	P14	114.16	102.17	77.35	106.03	78.86	72.98
6	1.3	3_lobix	ix	P14	120.67	118.23	120.47	65.93	54.39	109.24
6	1.3	4_lobix	ix	P14	87.66	95.98	90.99	87.66	95.98	90.99
6	1.3	5_lobix	ix	P14	112.67	112.96	110.38	59.09	106.55	107.61
6	1.3	6_lobi	i	P14	80.67	91.29	104.44	44.38	61.93	71.08
6	1.3	7_lobii	ii	P14	82.45	99.99	106.68	67.73	64.59	69.36
6	1.3	8_lobiii	iii	P14	102.73	121.31	112.19	90.08	76.5	88.37
6	1.3	9_lobiii	iii	P14	99.58	109.11	125.83	52	60.79	93.65
6	1.3	10_lobiii	iii	P14	126.66	133.88	120.49	79.76	83.47	66.53
6	1.4	1_lobx	x	P14	85.14	90.49	82.85	85.14	90.49	82.85
6	1.4	2_lobx	x	P14	68.01	75.75	86.57	61.89	72.62	79.67
6	1.4	3_lobix	ix	P14	90.76	81.9	101.9	56.6	49.29	68.91
6	1.4	4_lobix	ix	P14	84.2	89.89	97.13	84.2	89.89	92.13
6	1.4	5_lobix	ix	P14	104.77	111.49	94.42	55.53	45.89	69.18
6	1.4	6_lobi	i	P14	78.62	86.41	98.38	47.54	33.83	63.08
6	1.4	7_lobii	ii	P14	97.81	94.52	91.2	46.09	33.92	34.48
6	1.4	8_lobiii	iii	P14	111.28	133.87	138.9	64.65	70.23	85.06
6	1.4	9_lobiii	iii	P14	139.29	128.54	114.12	88.52	65.45	69.81
6	1.4	10_lobiii	iii	P14	105.42	104.33	93.37	62.67	69.99	59.74
7	1.1	1_lobx	x	P21	81.51	85.87	71.31	54.34	51.98	49.59
7	1.1	2_lobx	x	P21	88.34	78.32	67.26	56.46	46.09	42.95
7	1.1	3_lobix	ix	P21	116.04	122.31	112.66	76.3	72.47	78.48
7	1.1	4_lobix	ix	P21	95.66	109.73	95.74	65.65	74.09	58.84
7	1.1	5_lobix	ix	P21	129.92	125.6	133.32	85.95	82.76	87.94
7	1.1	6_lobi	i	P21	114.45	122.36	110.07	92.28	88.91	84.03
7	1.1	7_lobii	ii	P21	98.41	100.46	120.94	66.58	77.25	83.23
7	1.1	8_lobiii	iii	P21	113.47	129.11	139.09	78.22	80.95	100.79
7	1.1	9_lobiii	iii	P21	129.24	155.03	126.92	85.73	104.06	106.67
7	1.1	10_lobiii	iii	P21	141.32	133.11	125.39	94.01	104.43	89.75
7	1.2	1_lobx	x	P21	87.88	85.89	75.44	50.87	49.95	55.61
7	1.2	2_lobx	x	P21	98.93	101.56	90.24	64.6	71.49	58.73
7	1.2	3_lobix	ix	P21	122.42	119.51	107.97	76.71	82.83	70.01
7	1.2	4_lobix	ix	P21	149.74	143.92	128.03	82.93	104.7	70.53
7	1.2	5_lobix	ix	P21	99.04	108.38	106.14	59.59	64.09	57.78
7	1.2	6_lobi	i	P21	104.46	106.44	112.72	64.65	80.97	67.33
7	1.2	7_lobii	ii	P21	80.98	111.12	112.24	42.57	71.62	84.06
7	1.2	8_lobiii	iii	P21	157.15	141.26	126.44	92.15	80.91	87.39
7	1.2	9_lobiii	iii	P21	148.64	163.13	146.68	101.75	95.09	95.87
7	1.2	10_lobiii	iii	P21	147.2	132.7	115.74	100.1	92.64	65.83
7	1.3	1_lobx	x	P21	89.53	92.49	79.18	53.46	56.42	29.15
7	1.3	2_lobx	x	P21	98.51	89.26	86.53	58.59	51.44	38.21
7	1.3	3_lobix	ix	P21	112.28	112.55	100.97	60.78	62.99	54.04
7	1.3	4_lobix	ix	P21	116.19	109.36	106.38	72.03	64.67	68.26
7	1.3	5_lobix	ix	P21	113.7	115.4	120.44	73.61	80.36	77.71
7	1.3	6_lobi	i	P21	100.38	113.79	126.55	72.87	85.25	87.12
7	1.3	7_lobii	ii	P21	109.9	105.21	94.24	85.44	72.71	63.99
7	1.3	8_lobiii	iii	P21	134.93	140.01	123.1	88.23	104.28	85.21
7	1.3	9_lobiii	iii	P21	126.87	152.9	156.64	63.12	118.94	92.82
7	1.3	10_lobiii	iii	P21	114.33	115.41	146.09	75.13	82.49	116.04
7	1.4	1_lobx	x	P21	91.89	92.05	83.95	60.79	76.42	41.53
7	1.4	2_lobx	x	P21	89.41	85.44	81.6	42.68	39.8	53.68
7	1.4	3_lobix	ix	P21	111.5	105.51	103.65	80.3	59.36	78.42
7	1.4	4_lobix	ix	P21	94.39	102.52	93.17	53.5	67.9	49.14
7	1.4	5_lobix	ix	P21	119.92	126.25	119.18	76.83	101.13	72.91
7	1.4	6_lobi	i	P21	119.31	92.26	104.13	87.65	60.67	61.13
7	1.4	7_lobii	ii	P21	72.65	118.22	115.53	49.41	86.87	87.25
7	1.4	8_lobiii	iii	P21	139.48	153.14	120.02	119.51	116.56	92.67
7	1.4	9_lobiii	iii	P21	120.86	138.11	162.05	94.6	93.89	110.15
7	1.4	10_lobiii	iii	P21	135.21	132.66	126.81	93.51	95.97	95.33
8	1.1	1_lobx	x	P21	68.15	71.08	67.06	41.49	35.11	44.33
8	1.1	2_lobx	x	P21	63.17	67.05	89.48	45.31	44.48	68.94
8	1.1	3_lobix	ix	P21	93.18	98.74	114.55	55.08	64.94	72.57
8	1.1	4_lobix	ix	P21	72.82	59.82	61.3	45.51	33	48.69
8	1.1	5_lobix	ix	P21	106.81	105.22	106.15	71.56	85.22	81.31
8	1.1	6_lobi	i	P21	105.53	106.84	116.05	81.66	75.87	71.03
8	1.1	7_lobii	ii	P21	103.65	89.73	78.32	74.22	64.65	66.32
8	1.1	8_lobiii	iii	P21	141.69	149.41	130.92	105.01	117.32	99.8
8	1.1	9_lobiii	iii	P21	108.67	123.11	132.17	69.65	94.12	123.03
8	1.1	10_lobiii	iii	P21	110.38	125.23	115.22	74.88	84.77	84.62
8	1.2	1_lobx	x	P21	78.87	80.99	80.66	37.89	50.94	50.17
8	1.2	2_lobx	x	P21	93.83	96.53	81.02	62	59.68	50.46
8	1.2	3_lobix	ix	P21	125.67	133.63	136.82	84.88	95.12	97.18
8	1.2	4_lobix	ix	P21	103.66	101.32	99.43	78.15	84.98	76.32
8	1.2	5_lobix	ix	P21	136.32	136.55	125.51	92.54	98.96	88.06
8	1.2	6_lobi	i	P21	115.23	123.69	139.91	82.97	74.03	98.32
8	1.2	7_lobii	ii	P21	129.23	119.51	91.49	85.64	67.96	71.93
8	1.2	8_lobiii	iii	P21	131.48	121.46	118.39	82.81	86.94	76.99
8	1.2	9_lobiii	iii	P21	124.16	118.34	104.9	69.41	55.9	61.57
8	1.2	10_lobiii	iii	P21	114.35	118.63	119.2	80.22	67.11	84.65
8	1.3	1_lobx	x	P21	95.98	100.39	78.97	68.86	54.04	62.72
8	1.3	2_lobx	x	P21	97.14	98.72	91.66	62.04	69.96	68.63
8	1.3	3_lobix	ix	P21	112.34	124.08	134.43	80.24	86.54	94.82
8	1.3	4_lobix	ix	P21	163.14	141.62	126.51	105.26	100.52	79.19
8	1.3	5_lobix	ix	P21	91.92	87.11	114.54	64.73	56.77	59.7
8	1.3	6_lobi	i	P21	124.79	115.49	118.24	90.42	81.85	82.46
8	1.3	7_lobii	ii	P21	102.42	114.13	127.08	77.04	84.22	99.88
8	1.3	8_lobiii	iii	P21	154.12	133.32	122.76	114.63	87.78	101.45
8	1.3	9_lobiii	iii	P21	120.68	123.31	123.22	83.61	79.18	74.23
8	1.3	10_lobiii	iii	P21	116.4	124.23	130.24	85.8	87.82	109.51
8	1.4	1_lobx	x	P21	111.74	103.05	89.16	81.36	80.08	72.22
8	1.4	2_lobx	x	P21	112.4	104.64	91.51	70.74	70.9	53.73
8	1.4	3_lobix	ix	P21	142.79	125.31	113.47	103.39	81.67	82.34
8	1.4	4_lobix	ix	P21	110.72	102.16	89.16	76.12	71.34	66.66
8	1.4	5_lobix	ix	P21	111.79	115.87	141.15	75.33	73.42	77.71
8	1.4	6_lobi	i	P21	122.69	155.43	146.38	79.53	99.09	93.07
8	1.4	7_lobii	ii	P21	85.09	86.53	104.24	63.41	66.34	59.61
8	1.4	8_lobiii	iii	P21	80.25	84.69	105.99	45.13	58.26	69.74
8	1.4	9_lobiii	iii	P21	98.18	111.98	118.57	49.16	69.33	87.31
8	1.4	10_lobiii	iii	P21	98.32	101.15	89.91	58.93	48.07	67.02
9	1.1	1_lobx	x	P21	84.9	87.05	92.51	53.12	56.41	59.25
9	1.1	2_lobx	x	P21	105.43	103.84	99.31	67.65	76.01	68.41
9	1.1	3_lobix	ix	P21	124.31	119.98	124.32	95.21	97.03	87.14
9	1.1	4_lobix	ix	P21	133.95	106.11	109.51	103.44	83.3	75.59
9	1.1	5_lobix	ix	P21	158.95	151.27	125.21	87.21	81.92	91.67
9	1.1	6_lobi	i	P21	120.26	117.74	111.97	89.12	69.08	90.92
9	1.1	7_lobii	ii	P21	98.8	121.88	122.68	52.43	88.57	83.61
9	1.1	8_lobiii	iii	P21	142.93	128.27	107.24	83.89	101.26	68.35
9	1.1	9_lobiii	iii	P21	102.94	127.98	108.16	76.31	94.58	70.43
9	1.1	10_lobiii	iii	P21	132.12	129.28	120.33	96.11	90.77	98.96
9	1.2	1_lobx	x	P21	74.55	72.98	69.7	59.2	44.84	42.71
9	1.2	2_lobx	x	P21	102.23	89.08	80.17	66.46	57.12	47.79
9	1.2	3_lobix	ix	P21	109.44	112.81	119.66	72.3	93.12	78.64
9	1.2	4_lobix	ix	P21	136.68	110.41	109.63	102.91	79.33	61.92
9	1.2	5_lobix	ix	P21	120.38	109.5	122.28	93.53	83.62	82.55
9	1.2	6_lobi	i	P21	108.86	116.16	118.37	88.17	87.3	99.2
9	1.2	7_lobii	ii	P21	75.3	98.38	113.08	49.78	69.45	71.82
9	1.2	8_lobiii	iii	P21	135.29	124.56	114.46	80.58	84.8	64.89
9	1.2	9_lobiii	iii	P21	104.68	98.94	93.3	65.83	71.6	71.19
9	1.3	1_lobx	x	P21	122.31	125.1	114.99	70.22	95.09	90.99
9	1.3	2_lobx	x	P21	70.04	84.72	102.24	37.96	65.23	72.46
9	1.3	3_lobix	ix	P21	108.98	104.04	81.79	73.62	66.96	41.73
9	1.3	4_lobix	ix	P21	106.7	109.78	122.05	58.37	62.07	78.06
9	1.3	5_lobix	ix	P21	132.45	126.98	98.15	71.2	75.38	72.94
9	1.3	6_lobi	i	P21	132.43	122.88	143.41	83.9	69.27	85.56
9	1.3	7_lobii	ii	P21	100.76	95.73	102.24	63.8	61.51	69.88
9	1.3	8_lobiii	iii	P21	115.42	107.58	103.84	90.43	81.54	79.86
9	1.3	9_lobiii	iii	P21	113.5	118.71	130.43	80.11	68.58	83.27
9	1.3	10_lobiii	iii	P21	128.66	136.91	126.65	82.61	104.16	105.53
9	1.4	1_lobx	x	P21	63.8	80.08	92.41	35.5	40.34	43.59
9	1.4	2_lobx	x	P21	57.2	79.51	100.15	25.81	53.63	66.4
9	1.4	3_lobix	ix	P21	99.54	104.64	92.4	73.65	74.59	54.89
9	1.4	4_lobix	ix	P21	106.23	88.35	81.83	61.06	60.72	54.3
9	1.4	5_lobix	ix	P21	88.83	73.48	56.77	69.98	46.42	36.1
9	1.4	6_lobi	i	P21	90.05	105.02	97.78	39.02	67.64	70.88
9	1.4	7_lobii	ii	P21	93.63	109.16	109.1	57.95	84.9	86.28
9	1.4	8_lobiii	iii	P21	129.49	144.75	132.27	90.59	101.47	87.59
9	1.4	9_lobiii	iii	P21	101.89	134.94	126.45	71.89	81.55	83.47
9	1.4	10_lobiii	iii	P21	124.63	125.46	110.44	93.93	102.47	80.81
10	1.1	1_lobx	x	P35	97.47	65.18	62.36	77.57	71.34	45.49
10	1.1	2_lobx	x	P35	77.34	88.94	107.8	56.04	84.13	81.56
10	1.1	3_lobix	ix	P35	117.7	111.77	100.3	80.48	91	77.53
10	1.1	4_lobix	ix	P35	102.59	109.54	103.14	77.11	81.5	78.98
10	1.1	5_lobix	ix	P35	124.9	118.27	121.33	103.97	107.01	89.12
10	1.1	6_lobi	i	P35	124.98	94.32	89.96	109.23	87.05	83.25
10	1.1	7_lobii	ii	P35	146.8	145.78	120.25	123.07	130.72	99.94
10	1.1	8_lobiii	iii	P35	173.54	171.19	163.71	148.66	147.43	149.53
10	1.1	9_lobiii	iii	P35	166.27	160.89	169.09	129.97	136.08	141.66
10	1.1	10_lobiii	iii	P35	174.93	150.06	121.04	143.57	114.87	107.91
10	1.2	1_lobx	x	P35	86.81	80.96	87.76	75.32	65.14	73.17
10	1.2	2_lobx	x	P35	89.37	82.91	97.32	76.14	60.79	76.84
10	1.2	3_lobix	ix	P35	118.92	123.55	129.01	94.89	100.25	106.22
10	1.2	4_lobix	ix	P35	171.72	184.39	196.48	146.34	165.99	160.37
10	1.2	5_lobix	ix	P35	133.36	122.62	111.14	110.01	109.75	83.67
10	1.2	6_lobi	i	P35	125.2	123.82	120.57	108.38	109.51	106.45
10	1.2	7_lobii	ii	P35	160.64	152.68	144.71	134.62	129.26	124.18
10	1.2	8_lobiii	iii	P35	150.81	151.21	162.82	122.79	121.23	139.88
10	1.2	9_lobiii	iii	P35	142.35	173.3	154.1	119.62	145.03	127.19
10	1.2	10_lobiii	iii	P35	165.73	168.23	154.23	140.08	140.38	136.58
10	1.3	1_lobx	x	P35	75.07	68.75	65.65	60.19	51.95	54.39
10	1.3	2_lobx	x	P35	78.6	90.9	103.44	63.59	77.37	85.88
10	1.3	3_lobix	ix	P35	131.32	122.96	123.33	101.7	100.92	100.35
10	1.3	4_lobix	ix	P35	124.99	129.06	120.35	103.83	102.53	108.48
10	1.3	5_lobix	ix	P35	176.9	167.76	160.83	142.64	139.65	126.94
10	1.3	6_lobi	i	P35	105.44	94.16	102.03	95.5	79.27	81.72
10	1.3	7_lobii	ii	P35	133.07	138.15	95.66	109.69	112.42	88.83
10	1.3	8_lobiii	iii	P35	114.76	121.18	114.9	94.23	103.8	102.04
10	1.3	9_lobiii	iii	P35	106.16	90.9	117.23	94	77.86	99.87
10	1.3	10_lobiii	iii	P35	147.26	153.38	138.37	113.95	132.71	124.26
10	1.4	1_lobx	x	P35	96.51	91.56	92.4	73.2	72.44	74.96
10	1.4	2_lobx	x	P35	110.56	101.46	114.69	87.43	73.18	92.37
10	1.4	3_lobix	ix	P35	124.58	130.57	121.03	101.29	107.71	104.11
10	1.4	4_lobix	ix	P35	117.74	142.17	138.64	89.6	110.65	114.58
10	1.4	5_lobix	ix	P35	126.2	127.03	122.51	100.85	102.81	85.21
10	1.4	6_lobi	i	P35	131.1	117.8	125.31	111.97	95.78	98.49
10	1.4	7_lobii	ii	P35	146.83	106.92	110.16	114.2	105.83	110.16
10	1.4	8_lobiii	iii	P35	149.67	159.23	168.57	120.33	123.69	141.2
10	1.4	9_lobiii	iii	P35	165.74	167.09	135.98	135.13	142.39	116.3
10	1.4	10_lobiii	iii	P35	162.74	163.84	167.48	143.51	144.3	145.97
11	1.1	1_lobx	x	P35	91.09	102.45	93.33	62.68	73.31	89.64
11	1.1	2_lobx	x	P35	112.09	100.17	72.69	79.45	79.36	54.51
11	1.1	3_lobix	ix	P35	126.74	122.72	104.63	97.84	97.75	93.36
11	1.1	4_lobix	ix	P35	105.96	106.26	115.83	87.51	103.55	115.83
11	1.1	5_lobix	ix	P35	100.74	102.64	115.43	80.29	85.25	91.91
11	1.1	6_lobi	i	P35	130.04	147.1	150.99	122.63	128.85	139.88
11	1.1	7_lobii	ii	P35	147.71	124.27	117.93	127.54	113.53	104.83
11	1.1	8_lobiii	iii	P35	152.4	146.15	152.62	135.04	125.04	136.75
11	1.1	9_lobiii	iii	P35	141.9	130.21	107.42	121.45	109.86	93.86
11	1.1	10_lobiii	iii	P35	119.52	131.13	146.88	103.05	106.8	122.1
11	1.2	1_lobx	x	P35	92.48	75.87	76.28	78.76	62.21	62.69
11	1.2	2_lobx	x	P35	72.71	73.17	60.5	49.7	63.79	48.64
11	1.2	3_lobix	ix	P35	102.32	127.03	138.35	83.54	100.31	105.41
11	1.2	4_lobix	ix	P35	125.6	117.96	111.35	103.17	90.87	87.49
11	1.2	5_lobix	ix	P35	99.81	112.1	109.36	88.51	96.1	89.59
11	1.2	6_lobi	i	P35	108.42	106.35	114.52	89.52	92.32	102.72
11	1.2	7_lobii	ii	P35	54.71	48.52	109.34	46.76	48.52	94.54
11	1.2	8_lobiii	iii	P35	76.08	75.63	68.17	60.16	64.25	58.99
11	1.2	9_lobiii	iii	P35	140.75	125.74	118.37	140.75	125.74	118.37
11	1.2	10_lobiii	iii	P35	175.83	188.26	187.1	122.47	166.17	181.2
11	1.3	1_lobx	x	P35	107.83	108.16	123.89	86.37	90.45	87.73
11	1.3	2_lobx	x	P35	118.44	122.59	117.85	99.5	95.57	104.42
11	1.3	3_lobix	ix	P35	134.79	130.25	124.64	116.9	106.15	104.1
11	1.3	4_lobix	ix	P35	104.13	123.27	145.37	90.71	103.58	128.18
11	1.3	5_lobix	ix	P35	122.79	125.29	117.36	103.03	123.07	108.41
11	1.3	6_lobi	i	P35	132.04	131.76	112.67	109.39	109.55	112.67
11	1.3	7_lobii	ii	P35	147.88	150.68	138.52	118.85	125.21	115.01
11	1.3	8_lobiii	iii	P35	152.16	151.98	171.13	131.84	121.15	146.37
11	1.3	9_lobiii	iii	P35	120.84	86.89	75.5	98.97	78.32	70.81
11	1.3	10_lobiii	iii	P35	133.91	140.6	139.63	106.56	127.72	124.76
11	1.4	1_lobx	x	P35	133.2	155.34	190.03	112.16	144.04	168.66
11	1.4	2_lobx	x	P35	149.99	150.93	159.13	122.25	124.03	136.71
11	1.4	3_lobix	ix	P35	128.22	89.01	71.92	116.27	80.37	71.92
11	1.4	4_lobix	ix	P35	96.53	96.98	133.81	92.23	79.74	100.34
11	1.4	5_lobix	ix	P35	196.77	172.05	160.57	176.67	156.55	131.45
11	1.4	6_lobi	i	P35	75.56	133.17	136.04	56.85	105.27	106.03
11	1.4	7_lobii	ii	P35	89.59	96.97	116.04	74.33	88.19	96.03
11	1.4	8_lobiii	iii	P35	69.99	70.44	104	52.69	61.6	82.34
11	1.4	9_lobiii	iii	P35	100.55	107.88	127.54	87.11	89.99	113.17
11	1.4	10_lobiii	iii	P35	113.01	141.62	127.18	101.76	132.73	122.38
12	1.1	1_lobx	x	P35	133.17	163.43	147.44	119.28	129.17	137.07
12	1.1	2_lobx	x	P35	125.73	116.92	107.13	96.05	94.87	82.75
12	1.1	3_lobix	ix	P35	125.85	140.84	125.61	104.98	118.63	107.41
12	1.1	4_lobix	ix	P35	132.7	171.16	157.63	119.1	152.9	149.93
12	1.1	5_lobix	ix	P35	142.65	147	163.72	123.86	118.27	134.61
12	1.1	6_lobi	i	P35	139.9	115.83	105.37	121.6	93.26	86.74
12	1.1	7_lobii	ii	P35	85.01	83.97	88.38	77.16	71.32	73.25
12	1.1	8_lobiii	iii	P35	98.94	90.05	85.93	85.34	76.45	66.6
12	1.1	9_lobiii	iii	P35	126.34	113.52	104.93	107.49	108.48	72.87
12	1.1	10_lobiii	iii	P35	116.67	116.1	102.45	97.54	100.53	76.36
12	1.2	1_lobx	x	P35	71.33	77.9	93.31	47.08	60.99	59.75
12	1.2	2_lobx	x	P35	88.55	107.3	94.49	53.15	87.71	69.08
12	1.2	3_lobix	ix	P35	116.71	142.71	148.78	93.82	107.29	111.9
12	1.2	4_lobix	ix	P35	117.21	115.61	115.45	103.7	88.6	94.73
12	1.2	5_lobix	ix	P35	134.22	136.72	122.87	120.46	106.53	107.36
12	1.2	6_lobi	i	P35	122.32	131.11	131.72	105.03	115.56	116.15
12	1.2	7_lobii	ii	P35	136.71	119.03	102.63	113.58	97.26	80.42
12	1.2	8_lobiii	iii	P35	138.19	120.76	109.45	116.38	110.83	98.35
12	1.2	9_lobiii	iii	P35	116.6	125.41	107.41	98.98	106.14	87.03
12	1.2	10_lobiii	iii	P35	134.94	143.27	142.62	119.76	129.48	129.33
12	1.3	1_lobx	x	P35	109.42	103.69	84.77	86.02	81.65	54.55
12	1.3	2_lobx	x	P35	103.37	108.24	97.32	79.74	83.57	81.14
12	1.3	3_lobix	ix	P35	122.33	131.69	135.16	109.9	105.53	108.17
12	1.3	4_lobix	ix	P35	92.37	115.81	131.53	76.95	74.11	98.04
12	1.3	5_lobi	i	P35	152.15	171.27	178.2	137.09	141.85	144.43
12	1.3	6_lobii	ii	P35	132.19	131.47	117.69	98.23	116.82	105.94
12	1.3	7_lobii	ii	P35	142.71	139.3	120.43	102.73	104.32	108.48
12	1.3	8_lobiii	iii	P35	140.12	143.01	177.33	109.11	107.32	143.58
12	1.3	9_lobiii	iii	P35	131.23	119.11	85.8	113.78	102.94	72.6
12	1.3	10_lobiii	iii	P35	133.07	134.37	142.56	101.85	112.57	122.44
12	1.4	1_lobx	x	P35	102.08	90.32	96.42	68.05	77.12	82.54
12	1.4	2_lobx	x	P35	96.73	97.76	107.66	77.17	84.38	78.94
12	1.4	3_lobix	ix	P35	126.65	147.23	166.45	95.72	98.94	139.26
12	1.4	4_lobix	ix	P35	124.08	114.84	102.65	102.64	89.89	87.94
12	1.4	5_lobix	ix	P35	82.34	62.99	61.94	65.06	52.89	50.75
12	1.4	6_lobi	i	P35	85.6	92.57	114.18	60.46	77.65	88.69
12	1.4	7_lobii	ii	P35	88.75	105.27	90.36	71.63	77.8	83.19
12	1.4	8_lobiii	iii	P35	77.81	74.61	78.96	60.74	57.12	59.26
12	1.4	9_lobiii	iii	P35	120.28	126.17	88.08	120.28	104.02	69.5
12	1.4	10_lobiii	iii	P35	144.95	144.7	138.64	133	113.76	116.55
13	1.1	1_lobx	x	P60	94.36	88.88	87.53	82.25	78.55	78.51
13	1.1	2_lobx	x	P60	101.75	98.29	87.52	81.59	87.35	73.61
13	1.1	3_lobix	ix	P60	115.5	120.77	118.04	96.49	90.51	92.49
13	1.1	4_lobix	ix	P60	129.33	112.14	92.97	83.61	76.2	70.43
13	1.1	5_lobix	ix	P60	126.79	123.68	127.95	107.75	101.91	102.02
13	1.1	6_lobi	i	P60	119.47	142.44	148.71	102.48	126.89	130.95
13	1.1	7_lobii	ii	P60	100.88	105.84	116.58	77.35	95.64	92.98
13	1.1	8_lobiii	iii	P60	101.94	124.87	137.41	94.15	106.84	117.56
13	1.1	9_lobiii	iii	P60	141.88	151.74	135.91	117.17	132.27	114.1
13	1.1	10_lobiii	iii	P60	167.73	161.14	156.82	141.01	143.18	139.88
13	1.2	1_lobx	x	P60	77.61	74.88	77.7	72.77	63.12	71.51
13	1.2	2_lobx	x	P60	97.44	105.23	84.04	67.69	92.41	70.09
13	1.2	3_lobix	ix	P60	155.69	159.33	145.58	128.31	118.35	121.09
13	1.2	4_lobix	ix	P60	136.28	142.37	127.78	121.81	110.38	89.34
13	1.2	5_lobix	ix	P60	174.07	167.26	147.62	151.86	135.97	111.97
13	1.2	6_lobi	i	P60	124.93	152.87	125	94.08	126.82	111.77
13	1.2	7_lobii	ii	P60	121.23	118.35	97.2	116.41	110.02	93.73
13	1.2	8_lobii	ii	P60	112.08	136.35	150.61	95.82	115.16	129.88
13	1.2	9_lobiii	iii	P60	172.68	165.34	156.61	139.21	130.21	123.04
13	1.2	10_lobiii	iii	P60	160.91	173.44	179.73	137.98	127.5	150.8
13	1.3	1_lobx	x	P60	82.21	89.25	96.12	64.06	78.13	85.09
13	1.3	2_lobx	x	P60	110.15	101.57	93.3	87.93	79.09	73.33
13	1.3	3_lobix	ix	P60	146.98	138.26	129.19	111.48	115.05	108.54
13	1.3	4_lobix	ix	P60	125.28	105.5	82.71	104.66	82.93	71
13	1.3	5_lobix	ix	P60	143.5	149.02	147.7	119.42	115.95	122.22
13	1.3	6_lobi	i	P60	124.69	129.03	130.99	102.83	107.05	104.48
13	1.3	7_lobii	ii	P60	149.81	132.42	111.56	126.01	106.63	95.16
13	1.3	8_lobii	ii	P60	138.67	135.64	156.11	117.58	118.93	123.33
13	1.3	9_lobiii	iii	P60	141.76	136.12	88.47	116.72	117.58	65.04
13	1.3	10_lobiii	iii	P60	165.47	177.09	184.81	140.98	154.9	156.64
13	1.4	1_lobx	x	P60	88.6	78.91	81.31	71.82	65.85	50.81
13	1.4	2_lobx	x	P60	94.31	89.49	81.82	70.43	66.58	75.12
13	1.4	3_lobix	ix	P60	124.08	131.66	135.88	95.84	112.53	105.67
13	1.4	4_lobix	ix	P60	108.25	113.44	105.04	92.64	98.56	90.03
13	1.4	5_lobix	ix	P60	118.02	116.72	94.54	75.56	84.45	62.07
13	1.4	6_lobi	i	P60	91.97	102.31	98.29	81.66	81.6	78.29
13	1.4	7_lobii	ii	P60	93.32	94.83	91.16	77.65	65.72	76.64
13	1.4	8_lobiii	iii	P60	158.73	179.77	150.64	133.36	148.66	130.23
13	1.4	9_lobiii	iii	P60	152.4	156.66	123.96	114.88	136.6	110.25
13	1.4	10_lobiii	iii	P60	122.64	120.13	120.73	84.93	90.65	94.15
14	1.1	1_lobx	x	P60	85.41	93.46	102.89	79.09	80.84	90.26
14	1.1	2_lobx	x	P60	74.04	102.74	84.28	65.51	82.62	65.32
14	1.1	3_lobix	ix	P60	138.37	140.68	114.77	107.66	117.04	94.68
14	1.1	4_lobix	ix	P60	121.5	128.86	134.3	96.58	97.12	100.86
14	1.1	5_lobix	ix	P60	114.72	115.45	99.48	95	97.88	87.55
14	1.1	6_lobi	i	P60	81.22	83.84	88.87	64.52	63.04	58.65
14	1.1	7_lobii	ii	P60	133.76	119.51	131.97	127.15	112.92	99.15
14	1.1	8_lobiii	iii	P60	120.15	136.16	129.23	92.31	103.65	107.21
14	1.1	9_lobiii	iii	P60	143.03	145.42	138.69	115.81	120.87	107.38
14	1.1	10_lobiii	iii	P60	157.19	157.14	149.23	135.22	123.79	132.61
14	1.2	1_lobx	x	P60	107.35	113.22	113.9	92.08	98.6	99.4
14	1.2	2_lobx	x	P60	121.52	79.96	103.63	101.84	67.05	81.55
14	1.2	3_lobix	ix	P60	119.87	147.85	130.71	101.72	88.89	115.86
14	1.2	4_lobix	ix	P60	188.7	167.86	146.42	158.93	151.69	114.75
14	1.2	5_lobix	ix	P60	146.95	131.13	133.3	120.46	99.26	103.36
14	1.2	6_lobi	i	P60	154.55	157.68	154.43	125.97	131.78	133.08
14	1.2	7_lobii	ii	P60	141.76	122.77	123.93	112.82	107.56	120.16
14	1.2	8_lobii	ii	P60	145.02	136.35	112.81	121.96	111.24	95.96
14	1.2	9_lobiii	iii	P60	154.09	166.31	176.59	132.24	137.84	130.3
14	1.2	10_lobiii	iii	P60	142.68	170.17	155.35	124.99	138.3	131.19
14	1.3	1_lobx	x	P60	105.22	106.4	100.39	96.43	98.51	91.89
14	1.3	2_lobx	x	P60	104.86	104.63	80.24	92.24	89.99	60.67
14	1.3	3_lobix	ix	P60	144.69	144.89	137.33	114.54	127.17	121.59
14	1.3	4_lobix	ix	P60	183.87	151.47	174.42	141.63	109.89	151.92
14	1.3	5_lobix	ix	P60	148.78	133.65	122.95	124.06	106.89	94.36
14	1.3	6_lobi	i	P60	150.32	157.37	137.67	132.41	130.18	111.13
14	1.3	7_lobii	ii	P60	131.53	116.06	97.21	106.09	82.09	68.99
14	1.3	8_lobii	ii	P60	136.68	133.23	103.45	110.94	111	82.3
14	1.3	9_lobiii	iii	P60	151.73	166.95	164.78	115.15	135.58	136.13
14	1.3	10_lobiii	iii	P60	82.71	94.29	104.23	58.41	85.85	95.48
14	1.4	1_lobx	x	P60	100.79	118.39	119.54	79.57	83.85	76.79
14	1.4	2_lobx	x	P60	116.38	133.6	147.42	85.05	117.8	115.39
14	1.4	3_lobix	ix	P60	182.96	177.54	155.07	153.84	131.6	111.1
14	1.4	4_lobix	ix	P60	136.14	132.02	128.49	101.14	98.94	86.09
14	1.4	5_lobix	ix	P60	137.84	128.19	130.45	103.66	94.91	86.89
14	1.4	6_lobi	i	P60	146.71	145.68	135.08	123.55	115.62	112.65
14	1.4	7_lobii	ii	P60	143.89	152.24	126.28	126.24	129.41	108.86
14	1.4	8_lobiii	iii	P60	147.88	163.59	170.73	118.37	131.35	134.88
14	1.4	9_lobiii	iii	P60	164.06	172.51	150.25	127.43	124.57	108.83
14	1.4	10_lobiii	iii	P60	160.63	176.1	177.71	129.85	143.51	142.66
15	1.1	1_lobx	x	P60	80.54	79.08	84.38	74.01	73.42	80.63
15	1.1	2_lobx	x	P60	83.63	88.55	78.03	70.9	69.43	48.77
15	1.1	3_lobix	ix	P60	103.03	85.15	96.49	77.56	68.55	74.03
15	1.1	4_lobix	ix	P60	86.22	62.53	50.65	56.75	51.06	41.77
15	1.1	5_lobix	ix	P60	57.89	59.8	70.91	51.25	50.34	57.01
15	1.1	6_lobi	i	P60	100.21	91.08	84.01	78.06	73.34	67.5
15	1.1	7_lobii	ii	P60	114.4	132.24	132.69	88.36	113.95	115.37
15	1.1	8_lobiii	iii	P60	125.66	148.24	144.48	96.16	115.34	121.3
15	1.1	9_lobiii	iii	P60	171.86	173.6	128.07	137.32	154.33	109.45
15	1.1	10_lobiii	iii	P60	76.9	73.8	77.98	63.31	62.21	64
15	1.2	1_lobx	x	P60	111.19	112.07	103.67	79.25	80.18	87.69
15	1.2	2_lobx	x	P60	105.76	98.3	83.57	88.36	76.06	54.34
15	1.2	3_lobix	ix	P60	110.35	130.7	130.91	82.39	99.37	104.18
15	1.2	4_lobix	ix	P60	147.71	116.64	112.72	107.2	93.27	89.97
15	1.2	5_lobix	ix	P60	95.72	92.4	84.91	76.9	76.45	74.58
15	1.2	6_lobi	i	P60	105.7	129.33	136.85	77.25	107.69	118.01
15	1.2	7_lobii	ii	P60	130.87	110.09	103.39	104.6	96.65	83.19
15	1.2	8_lobii	ii	P60	154.66	165.97	152.67	123.32	137.16	121.46
15	1.2	9_lobiii	iii	P60	129.71	134.83	120.14	112.31	125.41	106.81
15	1.2	10_lobiii	iii	P60	161.63	159.31	146.51	138.35	136.65	126.2
15	1.3	1_lobx	x	P60	107.68	111.58	122.42	92.86	95.63	103.11
15	1.3	2_lobx	x	P60	104.7	96.26	99.31	84.92	78	80.17
15	1.3	3_lobix	ix	P60	115.62	133.79	139.23	97.54	115.57	109.97
15	1.3	4_lobix	ix	P60	155.53	140.95	135.97	130.57	127.95	121.44
15	1.3	5_lobix	ix	P60	151.54	152	152.2	110.97	123.96	129.3
15	1.3	6_lobi	i	P60	107.58	118.99	106.43	82.55	87.28	95.79
15	1.3	7_lobii	ii	P60	143.05	128.91	116.81	118.86	111.25	86.62
15	1.3	8_lobii	ii	P60	152.52	125.05	120.56	125.99	111.38	108.07
15	1.3	9_lobiii	iii	P60	129.44	146.79	144.89	107.62	113.45	121.78
15	1.3	10_lobiii	iii	P60	157.74	141.8	160.94	144.07	121.17	135.59
15	1.4	1_lobx	x	P60	95.69	104.64	125.62	87.77	94.36	111.48
15	1.4	2_lobx	x	P60	109	104.77	105.44	88.43	94.51	88.35
15	1.4	3_lobix	ix	P60	152.54	138.34	130.43	126.27	110.09	106.41
15	1.4	4_lobix	ix	P60	140.53	133.76	130.8	109.31	119.92	97.14
15	1.4	5_lobix	ix	P60	156.91	152.21	150.98	131.52	129.75	137.85
15	1.4	6_lobi	i	P60	129.41	128.6	127.59	110.67	114.4	108.88
15	1.4	7_lobii	ii	P60	155.16	167.4	163.17	109.77	138.4	131.53
15	1.4	8_lobiii	iii	P60	172.57	187.45	177.24	132.65	156.11	150.85
15	1.4	9_lobiii	iii	P60	141.17	154.74	174.98	113	117.27	143.01
15	1.4	10_lobiii	iii	P60	164.01	187.29	184.59	140.95	151.03	163.47
