# Supplementary material for: Differential spatiotemporal development of Purkinje cell populations and cerebellum-dependent sensorimotor behaviors
Source: eLife. 2021 May 11;10:e63668. doi: 10.7554/eLife.63668 (PMC8195607; doi:10.7554/eLife.63668)
Supplement: Figure 5—source data 1. [file elife-63668-fig5-data1.xlsx]

## Sheet: P7 axons
Axon 1	Axon 2	Axon 3	Axon 4	Axon 5	Axon 6
1	1	1	1	1	1
1	2	1	2	2	2
2	3	2	2	2	2
3	2	2	3	3	2
3	3	2	7	3	2
7	2	3	6	2	2
4	2	3	6	3	2
4	2	4	2	3	3
8	4	5	3	3	2
2	2	3	2	3	3
2	4	1	1	2	4
1	13	2	1	5	3
2	11	3	0	4	1
2	8	2	0	3	1
1	9	3	0	6	4
1	12	1	0	4	5
1	15	2	0	5	4
1	9	3	0	4	11
1	8	0	0	3	6
1	4	0	0	3	7
1	6	0	0	1	5
1	3	0	0	1	6
1	1	0	0	2	8
1	4	0	0	8	6
1	5	0	0	7	4
1	2	0	0	4	5
1	1	0	0	3	2
1	1	0	0	3	1
1	1	0	0	4	2
0	1	0	0	4	1
0	2	0	0	5	4
0	0	0	0	3	4
0	0	0	0	2	0
0	0	0	0	0	0
0	0	0	0	0	0
0	0	0	0	0	0
0	0	0	0	0	0
0	0	0	0	0	0
0	0	0	0	0	0
0	0	0	0	0	0
0	0	0	0	0	0
0	0	0	0	0	0
0	0	0	0	0	0
0	0	0	0	0	0
0	0	0	0	0	0
0	0	0	0	0	0
0	0	0	0	0	0
0	0	0	0	0	0
0	0	0	0	0	0
0	0	0	0	0	0
0	0	0	0	0	0
0	0	0	0	0	0
0	0	0	0	0	0
0	0	0	0	0	0
0	0	0	0	0	0
0	0	0	0	0	0
0	0	0	0	0	0
0	0	0	0	0	0
0	0	0	0	0	0
0	0	0	0	0	0
0	0	0	0	0	0
0	0	0	0	0	0
0	0	0	0	0	0
0	0	0	0	0	0
0	0	0	0	0	0
0	0	0	0	0	0
0	0	0	0	0	0
0	0	0	0	0	0
0	0	0	0	0	0
0	0	0	0	0	0
0	0	0	0	0	0
0	0	0	0	0	0
0	0	0	0	0	0
0	0	0	0	0	0
0	0	0	0	0	0
0	0	0	0	0	0
0	0	0	0	0	0
0	0	0	0	0	0
0	0	0	0	0	0
0	0	0	0	0	0
0	0	0	0	0	0
0	0	0	0	0	0
0	0	0	0	0	0
0	0	0	0	0	0
0	0	0	0	0	0
0	0	0	0	0	0
0	0	0	0	0	0
0	0	0	0	0	0
0	0	0	0	0	0
0	0	0	0	0	0
0	0	0	0	0	0
0	0	0	0	0	0

## Sheet: P10 Z- axons
Axon 1	Axon 2	Axon 3	Axon 4	Axon 5	Axon 6	Axon 7	Axon 8
1	1	1	1	1	1	1	1
9	4	9	4	2	2	5	3
10	8	12	2	2	8	3	2
7	13	17	2	1	5	2	2
9	12	18	4	3	7	4	2
9	9	23	4	6	1	4	2
5	7	17	3	16	14	5	2
6	9	13	3	7	8	1	1
4	8	10	3	16	5	5	7
11	6	6	6	16	2	4	8
7	5	2	10	12	2	3	6
4	2	2	11	8	2	5	6
6	2	2	11	12	5	8	9
12	7	4	10	1	5	6	9
5	8	3	6	6	15	2	1
6	6	3	7	16	8	2	1
15	12	2	12	19	6	3	5
11	16	3	9	11	2	3	5
14	7	9	9	13	4	3	2
13	8	5	10	13	0	2	1
11	12	2	7	15	0	2	1
14	7	3	4	11	0	1	2
11	12	1	5	16	0	1	3
17	7	1	4	12	0	1	1
12	14	1	4	9	0	1	0
8	9	0	5	6	0	1	0
7	5	0	4	7	0	1	0
7	6	0	5	1	0	1	0
6	8	0	6	15	0	1	0
9	9	0	6	8	0	1	0
6	10	0	6	13	0	1	0
0	4	0	7	7	0	1	0
0	10	0	5	7	0	1	0
0	10	0	5	5	0	1	0
0	6	0	5	6	0	5	0
0	6	0	10	4	0	1	0
0	4	0	10	2	0	1	0
0	4	0	21	1	0	2	0
0	3	0	8	0	0	3	0
0	7	0	10	2	0	2	0
0	1	0	7	5	0	1	0
0	4	0	7	1	0	1	0
0	4	0	8	0	0	1	0
0	0	0	7	0	0	1	0
0	0	0	6	0	0	1	0
0	0	0	7	0	0	0	0
0	0	0	4	0	0	0	0
0	0	0	2	0	0	0	0
0	0	0	2	0	0	0	0
0	0	0	2	0	0	0	0
0	0	0	2	0	0	0	0
0	0	0	2	0	0	0	0
0	0	0	3	0	0	0	0
0	0	0	2	0	0	0	0
0	0	0	2	0	0	0	0
0	0	0	2	0	0	0	0
0	0	0	3	0	0	0	0
0	0	0	1	0	0	0	0
0	0	0	1	0	0	0	0
0	0	0	1	0	0	0	0
0	0	0	1	0	0	0	0
0	0	0	1	0	0	0	0
0	0	0	1	0	0	0	0
0	0	0	1	0	0	0	0
0	0	0	1	0	0	0	0
0	0	0	1	0	0	0	0
0	0	0	1	0	0	0	0
0	0	0	1	0	0	0	0
0	0	0	1	0	0	0	0
0	0	0	1	0	0	0	0
0	0	0	1	0	0	0	0
0	0	0	1	0	0	0	0
0	0	0	1	0	0	0	0
0	0	0	1	0	0	0	0
0	0	0	1	0	0	0	0
0	0	0	1	0	0	0	0
0	0	0	1	0	0	0	0
0	0	0	1	0	0	0	0
0	0	0	1	0	0	0	0
0	0	0	0	0	0	0	0
0	0	0	0	0	0	0	0
0	0	0	0	0	0	0	0
0	0	0	0	0	0	0	0
0	0	0	0	0	0	0	0
0	0	0	0	0	0	0	0
0	0	0	0	0	0	0	0
0	0	0	0	0	0	0	0
0	0	0	0	0	0	0	0
0	0	0	0	0	0	0	0
0	0	0	0	0	0	0	0
0	0	0	0	0	0	0	0
0	0	0	0	0	0	0	0

## Sheet: P10 Z+ axons
Axon 1	Axon 2	Axon 3	Axon 4	Axon 5	Axon 6	Axon 7	Axon 8	Axon 9	Axon 10	Axon 11
1	1	1	1	1	1	1	1	1	1	1
2	5	3	4	2	3	2	2	2	3	4
2	3	2	3	2	1	3	3	3	4	2
1	2	2	2	4	2	3	16	6	4	5
3	4	2	2	6	1	2	19	5	3	5
6	4	2	2	1	2	2	17	4	2	4
16	5	2	3	6	2	3	1	6	2	5
7	1	1	2	8	1	1	7	6	3	4
16	5	7	4	4	2	1	7	11	3	6
16	4	8	4	5	2	2	5	17	5	5
12	3	6	4	3	1	8	6	13	2	8
8	5	6	2	8	2	2	1	14	2	7
12	8	9	4	12	1	7	3	11	5	5
1	6	9	8	4	1	3	8	9	8	5
6	2	1	6	3	1	5	5	6	5	7
16	2	1	12	1	1	5	4	4	11	9
19	3	5	17	1	1	1	11	3	13	11
11	3	5	14	1	1	1	8	3	13	9
13	3	2	1	1	2	1	7	1	14	15
13	2	1	1	2	1	18	6	1	12	17
15	2	1	5	1	1	13	7	0	6	25
11	1	2	14	1	1	14	13	0	4	23
16	1	3	2	1	1	6	5	0	5	2
12	1	1	15	1	1	9	11	0	3	2
9	1	0	1	1	1	6	12	0	1	23
6	1	0	13	3	1	1	13	0	1	17
7	1	0	19	3	1	1	13	0	1	24
1	1	0	26	1	1	0	14	0	4	2
15	1	0	25	8	1	0	8	0	0	1
8	1	0	29	8	1	0	14	0	0	6
13	1	0	18	2	1	0	11	0	0	6
7	1	0	19	5	1	0	1	0	0	5
7	1	0	18	2	6	0	13	0	0	3
5	1	0	21	2	15	0	13	0	0	2
6	5	0	23	4	8	0	14	0	0	5
4	1	0	19	5	11	0	9	0	0	6
2	1	0	23	3	5	0	13	0	0	2
1	2	0	23	0	5	0	11	0	0	4
0	3	0	21	0	5	0	12	0	0	2
2	2	0	23	0	5	0	17	0	0	4
5	1	0	21	0	5	0	16	0	0	1
1	1	0	2	0	4	0	23	0	0	2
0	1	0	16	0	5	0	2	0	0	1
0	1	0	15	0	4	0	2	0	0	2
0	1	0	18	0	5	0	15	0	0	3
0	0	0	19	0	4	0	22	0	0	3
0	0	0	12	0	5	0	17	0	0	5
0	0	0	9	0	4	0	15	0	0	4
0	0	0	8	0	5	0	1	0	0	4
0	0	0	5	0	4	0	8	0	0	5
0	0	0	6	0	5	0	5	0	0	2
0	0	0	9	0	2	0	8	0	0	2
0	0	0	2	0	4	0	4	0	0	2
0	0	0	2	0	5	0	7	0	0	2
0	0	0	1	0	3	0	3	0	0	2
0	0	0	1	0	4	0	0	0	0	2
0	0	0	1	0	3	0	4	0	0	1
0	0	0	3	0	1	0	1	0	0	1
0	0	0	1	0	3	0	0	0	0	1
0	0	0	1	0	2	0	0	0	0	1
0	0	0	1	0	4	0	0	0	0	0
0	0	0	1	0	4	0	0	0	0	0
0	0	0	0	0	4	0	0	0	0	0
0	0	0	0	0	3	0	0	0	0	0
0	0	0	0	0	3	0	0	0	0	0
0	0	0	0	0	2	0	0	0	0	0
0	0	0	0	0	1	0	0	0	0	0
0	0	0	0	0	1	0	0	0	0	0
0	0	0	0	0	2	0	0	0	0	0
0	0	0	0	0	1	0	0	0	0	0
0	0	0	0	0	1	0	0	0	0	0
0	0	0	0	0	2	0	0	0	0	0
0	0	0	0	0	1	0	0	0	0	0
0	0	0	0	0	1	0	0	0	0	0
0	0	0	0	0	0	0	0	0	0	0
0	0	0	0	0	0	0	0	0	0	0
0	0	0	0	0	0	0	0	0	0	0
0	0	0	0	0	0	0	0	0	0	0
0	0	0	0	0	0	0	0	0	0	0
0	0	0	0	0	0	0	0	0	0	0
0	0	0	0	0	0	0	0	0	0	0
0	0	0	0	0	0	0	0	0	0	0
0	0	0	0	0	0	0	0	0	0	0
0	0	0	0	0	0	0	0	0	0	0
0	0	0	0	0	0	0	0	0	0	0
0	0	0	0	0	0	0	0	0	0	0
0	0	0	0	0	0	0	0	0	0	0
0	0	0	0	0	0	0	0	0	0	0
0	0	0	0	0	0	0	0	0	0	0
0	0	0	0	0	0	0	0	0	0	0
0	0	0	0	0	0	0	0	0	0	0
0	0	0	0	0	0	0	0	0	0	0

## Sheet: P14 Z- axons
Axon 1	Axon 2	Axon 3	Axon 4	Axon 5	Axon 6	Axon 7	Axon 8	Axon 9	Axon 10	Axon 11
1	1	1	1	1	1	1	1	1	1	1
2	5	3	3	2	1	3	4	4	1	2
3	9	3	6	4	1	2	4	7	3	3
2	7	4	7	10	2	2	4	1	6	4
2	8	5	6	6	5	5	5	12	8	8
3	11	5	6	5	6	6	4	1	5	7
2	13	3	4	5	6	11	7	13	6	7
2	15	5	4	5	6	11	7	13	7	9
2	12	6	6	5	10	10	7	18	6	9
2	16	9	8	9	6	11	10	2	6	2
4	24	6	3	9	8	17	11	25	4	21
4	17	8	3	8	7	14	10	31	4	15
8	18	8	3	7	5	20	11	26	3	2
3	12	10	7	12	7	14	12	26	4	13
4	14	7	9	11	5	14	9	19	5	13
3	15	6	10	9	4	20	13	2	5	8
4	12	9	9	9	3	14	13	12	7	7
7	13	9	9	11	5	16	15	13	6	8
7	15	10	8	19	7	15	19	14	4	11
6	15	11	8	15	7	16	16	12	4	1
8	10	14	7	15	7	16	14	13	3	1
7	14	8	8	12	7	12	13	13	3	13
11	9	8	4	17	8	8	13	8	3	11
9	6	10	3	10	7	9	9	6	5	9
10	3	8	5	13	7	6	13	7	4	11
10	7	10	7	10	7	5	10	9	5	14
7	4	10	4	12	5	3	6	9	5	8
11	1	11	4	13	2	3	5	8	3	6
9	0	13	2	11	3	3	4	4	1	7
10	0	10	2	16	6	2	4	5	1	9
8	0	9	3	11	2	2	4	3	4	9
6	0	13	1	4	4	2	4	1	2	6
4	0	11	1	2	7	2	2	1	0	2
4	0	6	0	3	3	2	2	0	0	4
6	0	4	0	3	2	2	2	0	0	5
5	0	6	0	2	4	2	1	0	0	3
4	0	3	0	1	0	2	1	0	0	3
2	0	3	0	0	0	2	1	0	0	3
2	0	3	0	0	0	2	1	0	0	3
3	0	3	0	0	0	1	1	0	0	2
2	0	2	0	0	0	1	1	0	0	5
4	0	0	0	0	0	1	1	0	0	3
2	0	0	0	0	0	1	1	0	0	3
1	0	0	0	0	0	0	1	0	0	3
0	0	0	0	0	0	0	0	0	0	2
0	0	0	0	0	0	0	0	0	0	0
0	0	0	0	0	0	0	0	0	0	0
0	0	0	0	0	0	0	0	0	0	0
0	0	0	0	0	0	0	0	0	0	0
0	0	0	0	0	0	0	0	0	0	0
0	0	0	0	0	0	0	0	0	0	0
0	0	0	0	0	0	0	0	0	0	0
0	0	0	0	0	0	0	0	0	0	0
0	0	0	0	0	0	0	0	0	0	0
0	0	0	0	0	0	0	0	0	0	0
0	0	0	0	0	0	0	0	0	0	0
0	0	0	0	0	0	0	0	0	0	0
0	0	0	0	0	0	0	0	0	0	0
0	0	0	0	0	0	0	0	0	0	0
0	0	0	0	0	0	0	0	0	0	0
0	0	0	0	0	0	0	0	0	0	0
0	0	0	0	0	0	0	0	0	0	0
0	0	0	0	0	0	0	0	0	0	0
0	0	0	0	0	0	0	0	0	0	0
0	0	0	0	0	0	0	0	0	0	0
0	0	0	0	0	0	0	0	0	0	0
0	0	0	0	0	0	0	0	0	0	0
0	0	0	0	0	0	0	0	0	0	0
0	0	0	0	0	0	0	0	0	0	0
0	0	0	0	0	0	0	0	0	0	0
0	0	0	0	0	0	0	0	0	0	0
0	0	0	0	0	0	0	0	0	0	0
0	0	0	0	0	0	0	0	0	0	0
0	0	0	0	0	0	0	0	0	0	0
0	0	0	0	0	0	0	0	0	0	0
0	0	0	0	0	0	0	0	0	0	0
0	0	0	0	0	0	0	0	0	0	0
0	0	0	0	0	0	0	0	0	0	0
0	0	0	0	0	0	0	0	0	0	0
0	0	0	0	0	0	0	0	0	0	0
0	0	0	0	0	0	0	0	0	0	0
0	0	0	0	0	0	0	0	0	0	0
0	0	0	0	0	0	0	0	0	0	0
0	0	0	0	0	0	0	0	0	0	0
0	0	0	0	0	0	0	0	0	0	0
0	0	0	0	0	0	0	0	0	0	0
0	0	0	0	0	0	0	0	0	0	0
0	0	0	0	0	0	0	0	0	0	0
0	0	0	0	0	0	0	0	0	0	0
0	0	0	0	0	0	0	0	0	0	0
0	0	0	0	0	0	0	0	0	0	0
0	0	0	0	0	0	0	0	0	0	0

## Sheet: P14 Z+ axons
Axon 1	Axon 2	Axon 3	Axon 4	Axon 5	Axon 6	Axon 7	Axon 8	Axon 9	Axon 10	Axon 11	Axon 12	Axon 13	Axon 14	Axon 15	Axon 16	Axon 17	Axon 18	Axon 19	Axon 20
1	1	1	1	1	1	1	1	1	1	1	1	1	1	1	1	1	1	1	1
2	3	1	3	1	4	2	1	2	3	4	2	3	1	1	1	2	2	1	5
3	4	2	6	2	4	4	7	3	2	4	2	2	5	2	2	2	2	2	5
3	4	2	7	9	5	4	5	5	4	7	1	4	5	2	2	2	2	4	6
4	2	2	6	4	5	6	8	6	2	7	1	1	3	2	2	2	2	9	7
3	3	2	7	3	8	8	6	5	4	6	2	1	2	3	2	2	3	6	6
3	3	2	6	4	15	9	11	7	3	6	2	1	3	2	2	2	2	4	5
6	2	3	7	8	14	3	5	1	2	14	2	2	5	3	2	2	2	3	7
6	2	3	9	9	21	6	7	14	2	9	1	2	8	2	3	2	2	4	12
7	2	8	7	5	11	7	12	11	2	4	1	2	12	5	2	6	3	1	15
10	2	13	9	7	15	5	16	11	3	5	1	1	14	5	2	6	4	3	12
7	2	12	9	9	11	8	12	6	3	8	3	1	13	7	2	4	3	3	13
8	1	9	1	8	1	7	16	7	4	4	1	1	12	12	2	7	2	4	18
7	1	12	12	12	12	9	13	8	5	4	1	1	14	10	2	9	2	4	17
7	1	9	13	7	13	9	1	12	3	5	1	1	17	8	2	11	2	5	1
5	1	8	7	11	8	9	12	8	2	4	3	2	14	9	2	5	3	6	18
6	1	4	12	1	1	12	1	1	5	4	3	3	12	16	2	8	2	4	12
8	4	5	13	8	11	11	9	12	3	8	7	4	18	28	2	9	3	7	12
10	4	5	12	4	1	1	14	11	6	9	3	5	14	17	2	16	3	1	7
11	6	7	1	2	9	9	6	5	5	1	4	5	18	13	2	13	9	6	7
8	3	6	6	3	11	11	6	11	6	9	5	8	24	9	2	13	7	7	6
12	3	5	7	2	9	14	4	6	8	9	4	1	31	17	2	10	6	7	6
15	2	7	3	4	7	15	3	7	14	6	5	11	23	12	2	11	10	7	4
12	3	6	1	7	6	9	2	8	11	15	3	8	24	12	2	14	11	6	3
13	2	8	1	5	4	13	5	6	9	11	3	7	18	11	2	12	10	6	6
13	3	4	1	6	5	9	3	5	8	9	3	7	12	8	2	11	11	1	1
13	5	2	0	7	5	6	2	2	12	12	3	6	13	6	2	4	13	12	5
11	6	4	0	1	5	4	8	2	8	6	5	5	12	5	3	8	12	12	9
16	3	2	0	11	5	1	7	2	6	6	3	6	8	3	2	6	9	1	7
11	5	2	0	6	2	2	4	2	6	7	3	5	9	4	3	6	11	11	6
10	7	2	0	5	3	2	3	6	13	3	4	7	10	4	3	4	9	13	3
12	7	2	0	5	3	2	2	4	8	3	3	7	6	5	3	2	11	15	3
7	5	3	0	5	1	1	1	4	13	2	5	8	4	4	2	1	10	12	3
5	5	3	0	3	2	0	0	4	15	4	4	7	2	3	3	2	6	9	4
8	5	3	0	1	0	0	0	4	13	9	6	11	1	3	3	2	7	1	1
9	9	3	0	1	0	0	0	6	22	6	9	9	1	4	3	3	11	8	1
14	11	3	0	0	0	0	0	7	15	1	5	8	1	6	3	3	16	5	0
14	11	3	0	0	0	0	0	8	11	1	4	9	1	9	4	3	11	3	0
16	8	4	0	0	0	0	0	4	8	0	6	12	1	8	3	1	10	5	0
12	13	4	0	0	0	0	0	5	5	0	7	11	1	8	5	1	12	4	0
10	12	6	0	0	0	0	0	4	6	0	12	13	2	8	11	1	10	2	0
9	14	7	0	0	0	0	0	1	5	0	17	7	1	5	5	1	10	3	0
8	14	5	0	0	0	0	0	1	8	0	4	1	1	6	5	1	6	1	0
5	10	8	0	0	0	0	0	1	7	0	14	6	1	4	8	1	7	0	0
5	5	8	0	0	0	0	0	0	5	0	12	7	1	7	10	1	5	0	0
3	7	11	0	0	0	0	0	0	2	0	9	9	0	6	9	1	5	0	0
2	3	7	0	0	0	0	0	0	2	0	8	7	0	5	7	2	4	0	0
2	4	7	0	0	0	0	0	0	0	0	14	11	0	7	9	1	5	0	0
2	3	9	0	0	0	0	0	0	0	0	15	1	0	7	6	3	3	0	0
3	2	8	0	0	0	0	0	0	0	0	13	12	0	7	5	1	0	0	0
1	1	9	0	0	0	0	0	0	0	0	1	4	0	6	7	2	0	0	0
1	2	1	0	0	0	0	0	0	0	0	6	7	0	13	9	1	0	0	0
1	3	1	0	0	0	0	0	0	0	0	6	7	0	13	10	0	0	0	0
1	5	1	0	0	0	0	0	0	0	0	9	4	0	16	13	0	0	0	0
1	3	8	0	0	0	0	0	0	0	0	7	4	0	11	13	0	0	0	0
1	5	8	0	0	0	0	0	0	0	0	3	3	0	8	8	0	0	0	0
2	3	5	0	0	0	0	0	0	0	0	4	0	0	19	12	0	0	0	0
2	6	8	0	0	0	0	0	0	0	0	0	0	0	9	11	0	0	0	0
2	0	5	0	0	0	0	0	0	0	0	0	0	0	10	10	0	0	0	0
2	0	6	0	0	0	0	0	0	0	0	0	0	0	9	8	0	0	0	0
2	0	1	0	0	0	0	0	0	0	0	0	0	0	10	7	0	0	0	0
1	0	1	0	0	0	0	0	0	0	0	0	0	0	9	6	0	0	0	0
0	0	1	0	0	0	0	0	0	0	0	0	0	0	11	8	0	0	0	0
0	0	1	0	0	0	0	0	0	0	0	0	0	0	13	7	0	0	0	0
0	0	1	0	0	0	0	0	0	0	0	0	0	0	11	7	0	0	0	0
0	0	0	0	0	0	0	0	0	0	0	0	0	0	9	5	0	0	0	0
0	0	0	0	0	0	0	0	0	0	0	0	0	0	13	11	0	0	0	0
0	0	0	0	0	0	0	0	0	0	0	0	0	0	7	10	0	0	0	0
0	0	0	0	0	0	0	0	0	0	0	0	0	0	12	7	0	0	0	0
0	0	0	0	0	0	0	0	0	0	0	0	0	0	8	5	0	0	0	0
0	0	0	0	0	0	0	0	0	0	0	0	0	0	6	5	0	0	0	0
0	0	0	0	0	0	0	0	0	0	0	0	0	0	8	3	0	0	0	0
0	0	0	0	0	0	0	0	0	0	0	0	0	0	7	2	0	0	0	0
0	0	0	0	0	0	0	0	0	0	0	0	0	0	9	0	0	0	0	0
0	0	0	0	0	0	0	0	0	0	0	0	0	0	5	0	0	0	0	0
0	0	0	0	0	0	0	0	0	0	0	0	0	0	7	0	0	0	0	0
0	0	0	0	0	0	0	0	0	0	0	0	0	0	5	0	0	0	0	0
0	0	0	0	0	0	0	0	0	0	0	0	0	0	10	0	0	0	0	0
0	0	0	0	0	0	0	0	0	0	0	0	0	0	11	0	0	0	0	0
0	0	0	0	0	0	0	0	0	0	0	0	0	0	6	0	0	0	0	0
0	0	0	0	0	0	0	0	0	0	0	0	0	0	4	0	0	0	0	0
0	0	0	0	0	0	0	0	0	0	0	0	0	0	4	0	0	0	0	0
0	0	0	0	0	0	0	0	0	0	0	0	0	0	3	0	0	0	0	0
0	0	0	0	0	0	0	0	0	0	0	0	0	0	2	0	0	0	0	0
0	0	0	0	0	0	0	0	0	0	0	0	0	0	1	0	0	0	0	0
0	0	0	0	0	0	0	0	0	0	0	0	0	0	4	0	0	0	0	0
0	0	0	0	0	0	0	0	0	0	0	0	0	0	2	0	0	0	0	0
0	0	0	0	0	0	0	0	0	0	0	0	0	0	2	0	0	0	0	0
0	0	0	0	0	0	0	0	0	0	0	0	0	0	3	0	0	0	0	0
0	0	0	0	0	0	0	0	0	0	0	0	0	0	1	0	0	0	0	0
0	0	0	0	0	0	0	0	0	0	0	0	0	0	1	0	0	0	0	0
0	0	0	0	0	0	0	0	0	0	0	0	0	0	1	0	0	0	0	0

## Sheet: P21 Z- axons
Axon 1	Axon 2	Axon 3	Axon 4	Axon 5	Axon 6	Axon 7	Axon 8
1	1	1	1	1	1	1	1
3	7	1	2	3	1	2	2
1	5	1	2	3	2	3	2
6	3	2	2	2	3	7	3
4	5	3	2	3	2	12	3
5	10	4	7	2	4	14	4
10	8	3	4	4	5	8	4
8	6	3	5	3	6	7	9
4	11	3	6	6	4	11	9
9	18	18	5	4	4	2	9
4	15	24	6	4	8	1	9
4	19	19	3	3	7	0	6
4	21	23	9	3	5	0	5
7	20	18	11	5	5	0	5
7	33	26	4	4	3	0	4
11	19	18	6	3	3	0	3
9	18	15	7	3	9	0	4
12	17	9	7	3	11	0	3
15	17	16	7	4	8	0	5
18	21	24	9	4	4	0	2
13	20	30	3	4	9	0	2
15	21	31	1	3	13	0	4
15	18	29	1	3	9	0	4
12	13	20	1	2	8	0	8
10	14	19	1	2	1	0	7
19	10	11	0	1	13	0	6
12	9	18	0	4	11	0	6
12	2	8	0	3	11	0	8
15	4	10	0	3	6	0	7
9	11	6	0	1	5	0	1
9	8	7	0	2	7	0	7
12	6	8	0	0	2	0	4
8	11	7	0	0	1	0	5
4	8	5	0	0	1	0	4
5	8	10	0	0	1	0	6
4	7	8	0	0	1	0	6
6	5	3	0	0	1	0	6
5	3	6	0	0	1	0	3
7	3	8	0	0	0	0	4
5	9	13	0	0	0	0	4
3	3	12	0	0	0	0	8
10	1	9	0	0	0	0	3
6	1	7	0	0	0	0	2
10	1	9	0	0	0	0	1
15	1	19	0	0	0	0	1
8	2	11	0	0	0	0	1
2	0	11	0	0	0	0	1
0	0	5	0	0	0	0	0
0	0	6	0	0	0	0	0
0	0	11	0	0	0	0	0
0	0	15	0	0	0	0	0
0	0	3	0	0	0	0	0
0	0	3	0	0	0	0	0
0	0	4	0	0	0	0	0
0	0	3	0	0	0	0	0
0	0	1	0	0	0	0	0
0	0	1	0	0	0	0	0
0	0	6	0	0	0	0	0
0	0	3	0	0	0	0	0
0	0	5	0	0	0	0	0
0	0	7	0	0	0	0	0
0	0	3	0	0	0	0	0
0	0	2	0	0	0	0	0
0	0	2	0	0	0	0	0
0	0	0	0	0	0	0	0
0	0	0	0	0	0	0	0
0	0	0	0	0	0	0	0
0	0	0	0	0	0	0	0
0	0	0	0	0	0	0	0
0	0	0	0	0	0	0	0
0	0	0	0	0	0	0	0
0	0	0	0	0	0	0	0
0	0	0	0	0	0	0	0
0	0	0	0	0	0	0	0
0	0	0	0	0	0	0	0
0	0	0	0	0	0	0	0
0	0	0	0	0	0	0	0
0	0	0	0	0	0	0	0
0	0	0	0	0	0	0	0
0	0	0	0	0	0	0	0
0	0	0	0	0	0	0	0
0	0	0	0	0	0	0	0
0	0	0	0	0	0	0	0
0	0	0	0	0	0	0	0
0	0	0	0	0	0	0	0
0	0	0	0	0	0	0	0
0	0	0	0	0	0	0	0
0	0	0	0	0	0	0	0
0	0	0	0	0	0	0	0
0	0	0	0	0	0	0	0
0	0	0	0	0	0	0	0
0	0	0	0	0	0	0	0

## Sheet: P21 Z+ axons
Axon 1	Axon 2	Axon 3	Axon 4	Axon 5	Axon 6	Axon 7	Axon 8	Axon 9	Axon 10	Axon 11	Axon 12	Axon 13	Axon 14	Axon 15	Axon 16	Axon 17	Axon 18
1	1	1	1	1	1	1	1	1	1	1	1	1	1	1	1	1	1
3	4	3	2	2	2	2	2	1	1	2	2	2	1	3	2	2	3
3	2	4	2	4	2	5	1	3	2	3	3	3	3	5	1	3	5
4	1	10	1	4	3	9	2	2	2	5	4	3	1	4	2	2	3
3	3	7	1	3	2	8	2	2	1	1	3	3	1	6	2	6	4
4	4	6	2	5	2	16	4	2	2	6	3	5	3	3	7	8	8
4	3	13	3	5	1	13	7	2	2	6	4	6	3	9	4	8	6
3	4	9	2	4	2	12	9	2	1	4	4	4	3	18	6	7	2
3	6	14	1	9	2	13	9	2	2	6	4	1	4	11	8	10	1
2	7	10	5	15	4	14	14	5	2	6	5	1	4	9	6	14	3
4	7	9	7	17	2	9	9	5	2	6	3	1	3	16	8	10	1
4	4	15	7	20	2	12	8	3	2	6	8	1	2	17	9	9	2
4	12	14	5	18	2	13	6	2	2	7	15	1	3	12	1	8	2
6	12	15	10	11	4	8	9	3	2	9	7	1	2	9	7	11	4
3	8	16	11	18	6	9	7	3	2	15	7	1	1	5	7	7	4
4	7	13	9	8	8	12	6	11	2	14	11	1	3	9	1	9	3
3	8	14	11	12	8	1	8	1	2	9	1	2	5	9	9	8	4
6	5	17	20	19	11	12	11	1	2	9	1	2	4	7	1	7	4
5	5	12	9	12	12	1	9	11	2	1	11	2	4	11	1	6	5
8	5	10	7	12	9	14	1	1	2	8	11	3	5	6	7	3	2
16	5	8	10	14	12	14	6	8	2	9	12	2	4	7	6	4	6
9	3	10	6	16	11	14	2	6	2	7	1	2	4	8	5	4	5
13	9	12	7	26	20	12	3	8	2	5	9	2	3	8	6	3	5
13	16	12	14	27	16	8	1	9	2	6	11	2	2	8	9	2	6
12	16	7	5	21	11	8	2	7	2	7	8	2	3	1	8	3	4
9	8	5	7	26	10	8	0	8	2	8	6	2	3	13	1	3	8
11	8	7	8	19	19	6	0	9	4	9	5	3	2	7	1	2	8
17	12	16	6	21	13	7	0	1	6	7	6	2	1	8	11	2	7
10	8	7	11	22	9	7	0	6	9	6	3	2	1	7	9	1	9
15	11	21	11	10	11	1	0	11	9	5	4	3	1	7	1	0	5
13	9	17	9	13	12	7	0	7	8	4	3	3	3	1	7	0	4
19	16	15	4	15	9	4	0	7	6	4	4	2	4	5	8	0	4
17	13	20	10	16	7	6	0	9	4	3	7	2	0	5	6	0	2
18	12	11	17	11	11	5	0	7	5	3	5	1	0	5	6	0	1
9	13	17	17	12	13	7	0	7	8	1	8	2	0	7	6	0	0
7	10	17	10	10	13	7	0	7	13	1	9	2	0	5	6	0	0
1	15	10	8	11	12	6	0	5	5	1	1	2	0	8	4	0	0
2	10	11	10	14	10	3	0	5	6	0	5	3	0	5	7	0	0
3	8	12	8	20	21	2	0	5	7	0	6	4	0	6	6	0	0
2	5	6	7	18	17	4	0	3	6	0	9	1	0	3	6	0	0
5	6	11	10	14	14	2	0	3	8	0	7	3	0	4	4	0	0
2	6	8	7	9	12	2	0	4	5	0	6	1	0	5	4	0	0
2	3	13	6	10	15	2	0	4	7	0	7	3	0	4	3	0	0
1	4	5	3	10	15	0	0	4	6	0	4	2	0	6	6	0	0
0	5	4	2	12	9	0	0	5	8	0	3	1	0	4	5	0	0
0	9	6	3	6	13	0	0	7	8	0	4	1	0	1	2	0	0
0	6	8	6	7	11	0	0	5	12	0	4	2	0	3	1	0	0
0	7	7	2	6	7	0	0	7	7	0	3	3	0	2	2	0	0
0	8	8	1	8	9	0	0	5	8	0	3	0	0	1	1	0	0
0	9	8	2	7	9	0	0	3	1	0	2	0	0	2	3	0	0
0	5	3	2	5	9	0	0	2	13	0	2	0	0	0	2	0	0
0	9	4	1	6	7	0	0	1	2	0	0	0	0	0	4	0	0
0	15	3	2	9	0	0	0	1	2	0	0	0	0	0	4	0	0
0	9	5	1	15	0	0	0	0	1	0	0	0	0	0	2	0	0
0	6	4	3	15	0	0	0	0	0	0	0	0	0	0	2	0	0
0	4	2	3	14	0	0	0	0	0	0	0	0	0	0	1	0	0
0	5	1	3	17	0	0	0	0	0	0	0	0	0	0	1	0	0
0	5	0	3	9	0	0	0	0	0	0	0	0	0	0	0	0	0
0	4	0	5	13	0	0	0	0	0	0	0	0	0	0	0	0	0
0	2	0	6	15	0	0	0	0	0	0	0	0	0	0	0	0	0
0	5	0	6	7	0	0	0	0	0	0	0	0	0	0	0	0	0
0	4	0	7	5	0	0	0	0	0	0	0	0	0	0	0	0	0
0	1	0	2	9	0	0	0	0	0	0	0	0	0	0	0	0	0
0	2	0	4	5	0	0	0	0	0	0	0	0	0	0	0	0	0
0	2	0	3	4	0	0	0	0	0	0	0	0	0	0	0	0	0
0	2	0	3	4	0	0	0	0	0	0	0	0	0	0	0	0	0
0	1	0	4	3	0	0	0	0	0	0	0	0	0	0	0	0	0
0	0	0	5	3	0	0	0	0	0	0	0	0	0	0	0	0	0
0	0	0	3	3	0	0	0	0	0	0	0	0	0	0	0	0	0
0	0	0	3	4	0	0	0	0	0	0	0	0	0	0	0	0	0
0	0	0	1	2	0	0	0	0	0	0	0	0	0	0	0	0	0
0	0	0	2	0	0	0	0	0	0	0	0	0	0	0	0	0	0
0	0	0	1	0	0	0	0	0	0	0	0	0	0	0	0	0	0
0	0	0	2	0	0	0	0	0	0	0	0	0	0	0	0	0	0
0	0	0	1	0	0	0	0	0	0	0	0	0	0	0	0	0	0
0	0	0	2	0	0	0	0	0	0	0	0	0	0	0	0	0	0
0	0	0	1	0	0	0	0	0	0	0	0	0	0	0	0	0	0
0	0	0	2	0	0	0	0	0	0	0	0	0	0	0	0	0	0
0	0	0	1	0	0	0	0	0	0	0	0	0	0	0	0	0	0
0	0	0	1	0	0	0	0	0	0	0	0	0	0	0	0	0	0
0	0	0	1	0	0	0	0	0	0	0	0	0	0	0	0	0	0
0	0	0	1	0	0	0	0	0	0	0	0	0	0	0	0	0	0
0	0	0	0	0	0	0	0	0	0	0	0	0	0	0	0	0	0
0	0	0	0	0	0	0	0	0	0	0	0	0	0	0	0	0	0
0	0	0	0	0	0	0	0	0	0	0	0	0	0	0	0	0	0
0	0	0	0	0	0	0	0	0	0	0	0	0	0	0	0	0	0
0	0	0	0	0	0	0	0	0	0	0	0	0	0	0	0	0	0
0	0	0	0	0	0	0	0	0	0	0	0	0	0	0	0	0	0
0	0	0	0	0	0	0	0	0	0	0	0	0	0	0	0	0	0
0	0	0	0	0	0	0	0	0	0	0	0	0	0	0	0	0	0
0	0	0	0	0	0	0	0	0	0	0	0	0	0	0	0	0	0
0	0	0	0	0	0	0	0	0	0	0	0	0	0	0	0	0	0
