# Supplementary material for: Differential spatiotemporal development of Purkinje cell populations and cerebellum-dependent sensorimotor behaviors
Source: eLife. 2021 May 11;10:e63668. doi: 10.7554/eLife.63668 (PMC8195607; doi:10.7554/eLife.63668)
Supplement: Figure 6—source data 1. [file elife-63668-fig6-data1.xlsx]

## Sheet: Sheet1
			sessions															sessions
	mouse_id	gender	1	2	3	4	5	6	7	8	9	10				mouse_id	gender	1	2	3	4	5	6	7	8	9	10
CRperc_y	158	M	0	5	0	15	0	0	0	10	5	20			CRperc_a	173	M	0	0	5	0	5	5	10	15	35	60
	159	M	0	0	0	0	0	0	25	40	60	60				174	M	0	5	15	55	25	60	50	45	70	50
	160	M	15	15	10	55	50	20	50	55	60	70				176	M	0	5	10	42.1053	25	30	20	20	42.1053	50
	161	M	0	0	5	0	10	40	20	50	20	30				177	M	0	0	5	0	0	5	5	30	30	50
	162	M	0	0	5	0	10	40	20	50	20	30				179	F	5	15	40	33.33	60	40	55	63.1579	75	50
	163	F	0	0	0	5	0	0	0	5	5	30				180	F	0	25	65	55	55	60	65	40	40	50
	164	M	0	0	0	0	0	0	5	5	0	10				182	F	0	5	40	25	45	55.55	45	65	50	40
	165	F	0	0	0	0	0	0	10	40	45	30				183	F	0	0	5	0	0	25	45	30	50	70
	167	F	0	20	0	10	0	25	35	35	40	50				184	M	0	0	5	20	30	15	65	75	70	30
	168	F	0	30	20	15	10	0	5	15	20	30				185	M	0	0	0	0	25	30	70	55	75	40
	171	M	0	0	0	0	0	0	5	0	15	10				405	F	0	10	35	35	50	30	50	75	40	40
	175	M	0	10	30	55	40	60	55	50	65	50				406	F	0	5	15	15	15	50	30	55	45	30
	178	M	0	0	30	30	60	75	50	85	85	60				407	F	0	20	10	0	40	30	40	95	80	100
	181	M	5	5	0	0	5	25	35	30	45	50
	186	F	5	0	0	5	25	30	60	50	40	50
	408	M	0	0	20	5	25	60	75	55	55	20
	409	M	0	0	5	10	0	15	35	60	55	30
	410	M	15	5	5	15	30	10	35	35	30	50
			sessions															sessions
	mouse_id	gender	1	2	3	4	5	6	7	8	9	10				mouse_id	gender	1	2	3	4	5	6	7	8	9	10
FECamp_y	158	M	0.0441525258134949	0.0367628419682657	0.0334390980647403	0.0651590105961327	0.0408947337475834	0.0175683964540679	0.0135937788247941	0.0537376507069200	0.0332048090650615	0.113294897564286			FECamp_a	173	M	-0.0117764175882978	0.0216381402524374	0.0662337217181496	0.0422407125280303	0.0234741547842657	0.0349400237730801	0.0355661657264911	0.0304564823917828	0.168360932711317	0.214372979808615
	159	M	0.0182547227456990	0.0229307292180861	0.0173996496498262	0.0142963952724307	0.0270211997432547	0.0175077102434333	0.105790991511992	0.386958841876580	0.315734577528333	0.600398367794362				174	M	-0.00994700897987418	-0.00331423399801738	0.0588298639904174	0.251600448248742	0.323562930398405	0.424153161451817	0.496804209809006	0.484989511917015	0.730420751099249	0.517907426790967
	160	M	0.0628336620659548	0.0243768661966902	0.0527850074570284	0.246698617326482	0.342061030315809	0.180303625678384	0.376412679069023	0.418469913415311	0.510295617616112	0.440566877909518				176	M	0.0593613284224095	0.0708436190470059	0.0801984168480072	0.280278045963986	0.142527419049601	0.100748684746958	0.224392263622101	0.157819919131361	0.268808789174711	0.503147896503994
	161	M	0.0212437522077029	0.0768481182237994	0.0103199811159125	0.0429732712330888	0.0544949593249986	0.0829520986625927	0.217256546347758	0.207120186298984	0.193261260929533	0.221118799762914				177	M	0.00778676741807037	0.0103515170466069	0.00988342655572985	-0.000250472999985407	0.00601775634043151	0.0248542596011618	0.0582467545511644	0.0961029186349192	0.135658504166032	0.240168823778480
	162	M	0.0212437522077029	0.0768481182237994	0.0103199811159125	0.0429732712330888	0.0544949593249986	0.0829520986625927	0.217256546347758	0.207120186298984	0.193261260929533	0.221118799762914				179	F	0.0199866748700960	0.0461297705350576	0.136441535166712	0.0852518917513378	0.346034996973923	0.254259312064181	0.411379949940755	0.463410802036141	0.519889377451075	0.454137037055812
	163	F	0.0355776184446586	0.0681063085612043	0.0277911405141218	0.0305846513091404	0.0246159181729584	0.00769334673062524	0.0170195974983695	0.0273832276435221	0.0861031397874465	0.249128121261064				180	F	-0.0514109621102662	0.0479633135314973	0.274469899164734	0.318873960790513	0.396149383902946	0.349483260186375	0.442795269076425	0.274800826280411	0.429972741340731	0.464762969719192
	164	M	0.0274452545366639	0.0584142119517140	0.0169868648585504	0.0118228900789934	0.00701588785902915	0.0257563464236819	0.0175072360131297	0.0736250822177464	0.0299276803524726	0.0372976268896325				182	F	0.0355369126891859	0.0239448568042240	0.108240600276818	0.126874584878137	0.240780839950511	0.279020084644020	0.429213034486483	0.571340674956987	0.521027773390044	0.579095608911913
	165	F	0.0130492091592247	0.0168780045497023	0.0102760391069497	0.0100062429977347	0.0175132963768568	0.0142306502322627	0.0657592012560723	0.130763208986158	0.408258335113823	0.428182947085530				183	F	0.0202772204552018	0.0312294129523587	0.0303333589452515	0.0605869056246067	0.0247634591013028	0.146930132228728	0.265561543169139	0.187357038389315	0.376840308408880	0.377298927973024
	167	F	0.0561668015636539	0.0550597441698425	0.0647192881622649	0.0870155879332184	0.0232400462378877	0.263489203962756	0.279292800861823	0.273106931430349	0.408551674598240	0.753894423184501				184	M	0.00828158767789738	0.00849343950901637	0.0256452817841602	0.0836373670475457	0.108870497952191	0.119075443394629	0.293758208085713	0.550370827028349	0.936296050423979	0.572220904331669
	168	F	0.0630520361382446	0.0989825448373805	0.0786515907923795	0.0758695484963075	0.0480061339478415	0.0336155028740611	0.0580092250412343	0.0689828818820891	0.151803270530422	0.234153079338283				185	M	0.0109368172641585	0.00172658307039036	0.00866496965902158	0.0359009814000746	0.0725406752774002	0.0852884353315787	0.392039422088115	0.441659742095250	0.602437033138146	0.348167446530476
	171	M	0.0162804032972608	0.0106076320498673	0.0298211186960656	0.0251958776876423	0.0300813004742681	0.0207714729388354	0.0428238636823109	0.0371098051528985	0.0411706357888885	0.0548130496898597				405	F	-0.0262174509882465	0.145460238170722	0.251438433600726	0.288258294314773	0.401666397370820	0.228489701469495	0.378142945643916	0.593287574420407	0.345012612291010	0.281247870676860
	175	M	0.0361087575988876	0.0285222802136294	0.162414354705963	0.290488623348971	0.231003674692648	0.470957556945713	0.518718507472693	0.397118279756605	0.500141108325092	0.565611549181895				406	F	0.0615303500869869	0.0306128347490082	0.137839484776013	0.0530620631704880	0.125452189174689	0.330715950593547	0.175703796229270	0.464567342963532	0.320288075623057	0.284513921900738
	178	M	0.0211035106542992	0.0206855159281739	0.122062610334261	0.287096756374076	0.465692336374647	0.750946245051945	0.513113853843484	0.794735328383305	0.856175098826630	0.587747294840185				407	F	0.000305478178042078	0.0593710104432497	0.0480292180090000	0.0119930160561427	0.185362700442832	0.157451065001629	0.273671762284673	0.781344428859831	0.685749029029922	0.937843135950894
	181	M	0.0445761467349608	0.0269076605979013	0.0315803938230820	0.0358301923232417	0.0432223649668096	0.110560455102833	0.181877546482203	0.189122044043918	0.228451438187886	0.661593746780273
	186	F	0.0207879831093120	-0.00679199151991920	0.0204908396807752	0.0440380083114248	0.166027969160070	0.364065667371214	0.404019257645725	0.319038401277959	0.326151874946084	0.400780230589013
	408	M	0.0128074659734683	0.0285197063935569	0.0715581246242311	0.0598215003540359	0.255525786480655	0.326355808064116	0.522433077115847	0.277873101945140	0.390081731659562	0.158736887269360
	409	M	0.0351360030375538	0.0160933466293255	0.00248445879977867	0.0695141063965916	0.0555534941867679	0.0645950555025812	0.233624067619962	0.315603752871824	0.415779642816448	0.201226676263849
	410	M	0.101886853274420	0.00424198280291498	0.0376650182456155	0.0517127261067207	0.0879501178595461	0.0829686314007119	0.278308834150313	0.347518143860052	0.237943664818603	0.300889916080789
			sessions															sessions
	mouse_id	gender	1	2	3	4	5	6	7	8	9	10				mouse_id	gender	1	2	3	4	5	6	7	8	9	10
URonset_y	158	M	7.578	7.05	9.9	8.85	8.4	4.2	3.631	5.833	6.5	2.785				173	M	5	3.75	4.8	1.421	2.1	4.166	1.736	3	1.5	2.785
	159	M	0.15	4.5	9.6	9	8.4	5.4	2.368	7.421	4.05	2.785			URonset_a	174	M	2.55	3.176	3.45	3.15	5.166	3.45	3.5	4.666	4.312	4.714
	160	M	7.894	6.947	5.684	3.631	7.8	3	2.7	1.65	1.894	4.392				176	M	4.833	1.105	0.947	3	0.705	3.187	0.833	1.2	2.117	2.125
	161	M	0.45	1.15	1.35	1.95	4.55	7.35	5.833	3.15	7.105	2.379				177	M	5.368	7.05	6.75	8.1	8.7	6	5.833	4.105	6.315	5.4
	162	M	0.6	6.9	7.95	7.05	6	7.95	8.526	3.3	6.529	8.482				179	F	2.684	2.55	2.166	0.187	1.941	3.5	1.666	2.47	4.058	2.379
	163	F	1.5	1.85	2.85	3.45	3.3	8.25	3.3	7.05	1.5	4.344				180	F	4.166	4.833	4.5	3	5.333	2.684	4.588	9.375	5.062	3.62
	164	M	4.2	3.15	2.55	4.235	2.526	1.578	2.684	5.7	3.15	2.1				182	F	5.684	7.95	8.437	4.75	7.105	6	5.47	6.833	6.473	4.384
	165	F	1.35	2.25	6.6	4.05	4.95	3.45	3.833	3.882	2.166	4.8				183	F	10.578	9	10.2	10.578	9.157	10.058	9.352	12.833	11.166	11.888
	167	F	5.85	1.35	8.55	7.5	4.35	5.833	7.35	7.8	0.315	0.444				184	M	7.05	6	6.21	6.947	5.7	6.947	7.2	7.421	3.882	5.586
	168	F	4.35	6.9	5.25	6.05	5.25	3.15	4.588	6.75	4.736	5.4				185	M	12.75	12	11.55	10.65	10.35	11.7	10.35	9.473	8.4	12.517
	171	M	3.6	5.368	5.85	7.35	1.65	1.5	8.85	5.85	8.526	9.1				405	F	7.5	8.333	7.5	9	7.625	11.7	12	10.263	3.157	9.8
	175	M	1.578	1.2	3.315	6.176	2.166	4.166	2.833	4.105	4.2	4.3				406	F	14	13.5	10.105	11.052	7.95	8.526	7.8	7.263	10.894	9.133
	178	M	3.3	3.4	3.947	2.1	5	6.315	2.684	4.578	3.333	3.8				407	F	6.333	10.35	5.4	8.85	12.157	1.65	11.684	8.25	8.21	9.2
	181	M	4.764	3	3.882	3.45	6.882	1.894	4.578	6.631	7.263	6.103
	186	F	7.736	9.75	8.55	9.15	9.45	8.333	9.789	11	8.833	12.428
	408	M	10.894	5.25	1.65	10.578	7.894	6.05	3.9	7.8	7.5	6.6
	409	M	7.35	13.05	9.3	11.052	12.75	12.3	6.45	1.105	3.9	13.4
	410	M	21.833	9.75	8.25	10.05	6.9	7.5	8.1	13.2	7.833	12.31
			sessions															sessions
	mouse_id	gender	1	2	3	4	5	6	7	8	9	10				mouse_id	gender	1	2	3	4	5	6	7	8	9	10
URpeaktime_y	158	M	74.789	71.25	79	58.75	45.75	68.7	73.894	57.5	66.444	59.785				173	M	60.333	64.05	58.65	60.947	59.25	68.5	65.684	62.473	68.5	65.035
	159	M	70.45	43.05	57.7	47.25	65.6	64.9	62.684	62.842	62.4	67.714			URpeaktime_a	174	M	86.9	89	86.5	77.6	64	76.15	65.222	34.666	64.062	60.678
	160	M	71.736	68.789	65.578	60.473	67.5	28.2	52.35	36.45	24.473	28.071				176	M	62.5	65.631	65.842	64.421	65.647	69	63.166	62.65	66.823	42.75
	161	M	63.35	48.45	53.8	59.95	66.7	52.2	77.5	78.75	73.368	66.344				177	M	57.631	54.75	53.25	55.95	59.4	33	53.722	42.315	41.75	48.9
	162	M	54.6	53.05	60.85	56.05	60.55	60.5	64.684	52.6	72.352	61.137				179	F	68.578	54.3	69.166	67.75	77.352	73.333	74.5	58.941	71.294	36.275
	163	F	73	72.6	77.05	58	58.95	81.95	60.6	80.7	68.4	68.413				180	F	63.944	73	64.5	65.578	76.166	61.894	75.352	76.687	72.75	73.551
	164	M	37.5	66.55	80.65	61.823	68.473	53.421	75.736	39.4	68.35	70.633				182	F	71.315	81.2	67.875	71.5	65	69.75	69.47	70.333	67.21	68.23
	165	F	74.15	59.05	94.4	67.3	71.25	58.45	67.666	36.882	66.666	63.9				183	F	71.631	77.35	80.75	73.894	67.421	60	77.529	79.666	65.444	69.518
	167	F	96.85	81.8	74.55	82.75	78.4	66.5	63.9	69.8	62.842	66.333				184	M	79.8	76.85	72.315	80.894	67.4	67.736	64	72.421	64.176	63.413
	168	F	66.2	73.3	53.25	40.75	62.85	45.75	51.176	30.75	68.684	57.3				185	M	79.65	87.75	89.35	71.5	73.5	91.65	78.25	81.526	77.8	75.586
	171	M	68.65	73.631	77.1	65.65	63.45	58.8	71.7	62.85	67.105	67.533				405	F	74.8	77.333	68.5	67.9	57.055	68.4	69.7	69.894	56.473	66.6
	175	M	72.315	67.5	70.105	69.294	68.833	68.333	65.611	67.894	69.7	65.333				406	F	48.555	62	86	90.157	83.6	65.631	79.75	85.052	83.263	78.633
	178	M	65.85	40.55	74.368	65.7	73.277	76.263	73.578	70.105	71.666	76.2				407	F	87.333	87.3	76.05	73.15	70.578	75.1	77.157	87.05	68.631	67
	181	M	87.529	75.421	75.529	76.3	81.352	74.789	83.473	73.421	80.947	71.862
	186	F	71.368	80.95	80.5	76.8	78.55	76.611	71.578	71.333	92.166	80.642
	408	M	82.684	73.3	64.9	57.578	60.789	69.55	70.8	68.5	74.7	75.766
	409	M	94.65	93.4	71.7	93.473	96.25	83	64.8	62.157	90.65	82
	410	M	24.333	83.1	78.05	87.85	68.4	67.2	67.95	71.65	66.722	71.068
