# Supplementary material for: Differential spatiotemporal development of Purkinje cell populations and cerebellum-dependent sensorimotor behaviors
Source: eLife. 2021 May 11;10:e63668. doi: 10.7554/eLife.63668 (PMC8195607; doi:10.7554/eLife.63668)
Supplement: Figure 6—source data 2. [file elife-63668-fig6-data2.xlsx]

## Sheet: Baseline
Gain																														young	adult	young	adult
		ypr1	ypr2	ypr3	ypr4	ypr5	ypr6	ypr7	ypr8	ypr9	ypr10	ypr11	ypr12	ypr13	ypr14	ypr15	ypr16		apr1	apr2	apr4	apr5	apr6	apr7	apr8	apr9	apr10	apr11		av	av	sem	sem
OKR	0.1		0.693525	1.01113	1.08229	1.14651	1.07482		1.05559	0.943663	0.957384	0.904719	1.03351	0.874332	0.699294	0.873722	0.932055		1.00942	0.995202	0.95324	1.06312		0.984145	0.997922	0.898932	0.979385			0.948753	0.985171	0.0360234	0.0165929
	0.2	1.22517	0.770089	0.912057	0.941388	0.953683	0.87605	0.886202	0.938958	0.831392	0.851565	0.933354	0.917888	0.952678	0.724853	0.916862	0.85098		0.77949	0.87044	0.762107	0.948305	1.11966	0.986928	1.05829	0.845439	0.970458	1.02221		0.905198	0.936333	0.0269122	0.0376069
	0.4	0.897276	0.763282	0.774834	0.89269	0.810609	0.744552	0.746711	0.402903	0.743768	0.607513	0.898745	0.823135	0.782997	0.539916	0.774692	0.649118		0.588871	0.683658	0.790935	0.601712	0.495007	1.023	0.869786	0.789935	0.857119	0.90504		0.740796	0.760506	0.0335102	0.052061
	0.6	0.728993	0.568878	0.602973	0.650372	0.725386	0.56986	0.479193	0.639216	0.591095	0.464265	0.76277	0.79485	0.649721	0.528507	0.591567	0.561458		0.470069	0.505637	0.554336	0.447367	0.578937	0.523419	0.542742	0.498239	0.556245	0.688073		0.619319	0.536506	0.0240701	0.0212047
	0.8	0.544843	0.416444	0.440631	0.430259	0.400595	0.383016	0.287616	0.399354	0.428508	0.29249	0.489018	0.575226	0.413246	0.383164	0.425791	0.319237		0.356715	0.401093	0.411146	0.274062	0.513519	0.423276	0.375733	0.371386	0.385806	0.451891		0.41434	0.396463	0.0195887	0.0198507
	1	0.422447	0.37027	0.369308	0.337332	0.371879	0.290097	0.301872	0.333779	0.293761	0.291788	0.397841	0.4527	0.414048	0.235107	0.343003	0.275822		0.269097	0.352714	0.312695	0.275484	0.372097	0.347569	0.309079	0.272103	0.324898	0.345726		0.343816	0.318146	0.015065	0.0116597
VVOR	0.1	1.12894	0.763325	0.835229	1.02362	0.998401	0.954221	0.898042	0.953492	1.01258	0.882552	0.960589	0.905969	0.932686	0.907981	0.972792	0.88998		0.85906	1.02431	0.966788	1.01953	0.76993	1.06006	1.0496	1.06671	0.9884	1.07797		0.938775	0.988236	0.0209382	0.0316613
	0.2	1.11689	0.861297	0.967814	1.05489	1.03123	0.984933	0.930128	0.956721	0.934856	0.958645	1.02087	0.969003	0.990317	0.884877	0.974613	0.957557		0.852736	1.00023	1.01091	1.03757	1.02643	1.08691	1.08671	1.0647	1.04873	1.11218		0.974665	1.03271	0.0155166	0.0229572
	0.4	0.887092	0.895719	0.83002	1.01906	1.09171	0.941407	1.00679	1.00191	1.01577	1.02996	1.0728	1.07994	0.992472	0.710218	0.971858	0.920359		0.967019	1.03608	0.972796	0.977776	0.884077	1.18954	1.11314	1.06617	1.00709	1.02189		0.966692	1.02356	0.0250852	0.0269044
	0.6	1.09039	0.78061	0.864876	1.04493	1.04643	0.930212	0.921442	1.15825	1.04471	0.962946	1.05064	0.941717	0.95988	0.819316	0.99913	0.908538		0.899937	1.03787	1.16535	1.01409	0.922341	1.22326	1.11143	1.03842	1.11879	1.09625		0.970251	1.06277	0.0252172	0.0320975
	0.8	1.14622	0.822959	0.945673	0.84158	1.05577	0.926557	0.92153	1.09756	0.981079	1.0333	0.997538	1.05646	0.986534	0.914905	0.998833	0.959933		0.961475	1.05786	1.10649	1.06145	0.960606	1.06213	1.14991	1.09097	1.02819	1.19087		0.980402	1.067	0.0216502	0.0232027
	1	1.0002	0.763929	0.821463	0.865893	0.899682	1.09336	0.961041	0.891284	0.924999	0.970621	0.95543	1.04735	0.946707	0.911661	0.959476	1.01687		0.947727	0.964112	0.973356	1.06141	1.06481	1.01432	1.13352	1.07233	1.01495	1.21874		0.939373	1.04653	0.0206342	0.0263289
VOR	0.1	0.199119	0.192787	0.155796	0.0556846	0.2742	0.208004	0.394424	0.179659	0.214907	0.189432	0.177497	0.201073	0.137658	0.238409	0.247421	0.2798			0.387619	0.354002	0.269395	0.455052	0.411038	0.311446	0.449267	0.402752	0.384203		0.209117	0.380531	0.0182697	0.0202737
	0.2	0.218943	0.262159	0.0974031	0.0435735	0.105259	0.227338	0.333661	0.154356	0.264099	0.134142	0.253033	0.236753	0.224294	0.369361	0.27599	0.33702			0.301454	0.392394		0.518741	0.480898	0.413771	0.294263	0.439754	0.315241		0.221086	0.394565	0.0231127	0.0299735
	0.4	0.24029	0.403866	0.339546	0.280965	0.248349	0.242992	0.528673	0.440109	0.469329	0.440431	0.378062	0.341271	0.412058	0.396693	0.394358	0.381772			0.536148	0.589499	0.528584	0.473576	0.674757	0.65797	0.572864	0.713271	0.533747		0.371173	0.586713	0.0210908	0.0265066
	0.6	0.371934	0.609631	0.547511	0.518583	0.491103	0.51748	0.58597	0.514062	0.43966	0.539113	0.552703	0.519494	0.544761	0.442748	0.574984	0.721978			0.680037	0.776881	0.654456	0.860729	0.860771	0.866567	0.757989	0.814116	0.773128		0.530732	0.782742	0.0196205	0.0258001
	0.8	0.610939	0.684069	0.582814	0.560216	0.730969	0.572489	0.828055	0.661656	0.601635	0.652973	0.691483	0.607646	0.694682	0.65603	0.734145	0.740193			0.76073	0.859053	0.749125	0.858268	0.994178	1.06247	0.901998	1.03537	0.988814		0.663125	0.912223	0.0182597	0.038318
	1	0.60766	0.838306	0.744655	0.492869	0.604521	0.444972	0.781513	0.730864	0.773947	0.844329	0.687031	0.675401	0.806391	1.18571	0.730653	0.836647			0.779071	0.857675	0.461597	0.989541	0.9695	0.995257	0.85677	1.06392	1.01135		0.736592	0.887187	0.0421705	0.0612594
Phase
		ypr1	ypr2	ypr3	ypr4	ypr5	ypr6	ypr7	ypr8	ypr9	ypr10	ypr11	ypr12	ypr13	ypr14	ypr15	ypr16		apr1	apr2	apr4	apr5	apr6	apr7	apr8	apr9	apr10	apr11		young	adult
OKR	0.1		-0.403087	1.79708	-0.413162	3.34027	2.68384		2.12128	1.45686	3.71633	2.14885	-0.955935	2.78051	2.07026	-2.80464	2.94503		-1.38373	-1.38288	-1.0744	-3.1906		-3.85372	2.12785	-2.94098	-0.632577			1.46311	-1.54138	0.505327	0.662556
	0.2	-0.89108	0.339289	-2.9024	-2.39848	-0.123733	-1.89974	-2.64264	0.0516945	-2.91594	-2.00665	-2.56794	-1.17577	-0.372117	3.15752	-0.648515	-2.89398		-4.48808	-4.03968	-6.17836	-6.95618	-12.3805	-10.6275	-3.23946	-5.77371	-2.53365	-2.58456		-1.24316	-5.88017	0.410181	1.05624
	0.4	-5.81074	-3.86015	-7.74513	-9.3185	-8.04405	-8.46938	-7.60193	-12.6106	-6.71072	-2.34022	-5.87477	-5.22379	-7.86647	-13.2024	-7.98658	-6.24312		-8.27009	-6.20165	-10.2906	-13.375	-6.29255	-13.3689	-8.6802	-7.02289	-8.02601	-7.86321		-7.43179	-8.93911	0.696111	0.828672
	0.6	-13.4139	-11.932	-19.0327	-18.2198	-17.9344	-16.7692	-19.4093	-19.4373	-18.2197	-19.4399	-11.2489	-11.1887	-14.1152	-21.4311	-14.6227	-14.9267		-11.2032	-13.4742	-15.8067	-16.5631	-19.3304	-19.4383	-17.932	-21.2429	-17.7433	-14.829		-16.3338	-16.7563	0.821407	0.957817
	0.8	-22.3054	-21.6819	-26.9646	-30.2604	-31.6736	-34.2589	-30.105	-31.7856	-34.8938	-33.5156	-26.1882	-21.4037	-24.7579	-41.5992	-28.8044	-30.5697		-22.396	-19.0781	-23.4795	-31.872	-32.3971	-28.7296	-27.7244	-30.3543	-23.9699	-24.1403		-29.423	-26.4141	1.36168	1.40597
	1	-36.0253	-32.0955	-36.2408	-43.6228	-40.7175	-39.8724	-36.0333	-45.5518	-48.229	-42.4746	-37.838	-33.0774	-36.2279	-48.678	-37.6891	-42.9603		-28.3365	-20.4609	-31.0607	-38.4959	-39.7847	-42.7724	-33.6641	-36.9032	-27.2743	-32.136		-39.8333	-33.0889	1.26204	2.11766
VVOR	0.1	-0.955449	5.53852	2.71635	-0.140668	3.03782	2.62881	3.33391	4.27335	4.21144	3.95431	4.94771	3.84925	4.19221	8.77584	3.06795	2.97974		3.9843	0.718095	1.44744	4.99669	-0.845883	-0.220787	2.77993	0.986308	3.01359	0.442807		3.52569	1.73025	0.544534	0.59868
	0.2	0.96446	0.338584	-0.305878	-0.0641522	0.205873	1.63226	1.43316	0.288994	2.41228	2.57233	2.28857	2.66733	2.10976	4.03403	1.28835	-0.218201		1.89676	1.21797	1.34639	1.5894	3.20928	-1.05185	1.60896	0.333378	1.69563	0.66527		1.35298	1.25112	0.315685	0.352619
	0.4	1.01947	0.601905	1.29	-0.995053	-0.275034	2.57708	0.190528	-0.347624	1.27009	2.01908	1.24885	1.28277	0.937357	2.58414	0.647334	-0.0833352		1.60908	1.78112	-0.464724	2.87288	9.20566	-7.08787	1.32079	0.990517	2.89108	0.958733		0.872972	1.40773	0.255065	1.25344
	0.6	0.718077	-0.017479	2.12155	-2.34137	-0.083187	-2.95854	-0.504622	-0.328746	0.314615	0.207608	2.01309	0.60546	1.67926	1.31145	0.598504	1.56238		1.14484	2.40885	0.432696	2.31862	5.88	-1.43588	1.26149	1.23923	0.518099	-0.88201		0.306128	1.28859	0.353685	0.64015
	0.8	-1.07284	1.04917	1.80769	-1.24686	0.0510623	0.914292	0.879714	-0.106007	0.916083	0.215064	1.78208	2.0931	0.915577	2.58665	1.4754	2.78471		1.68823	3.74559	1.64258	0.819006	2.55435	-0.546825	2.08975	2.71925	1.35682	-1.07113		0.940305	1.49976	0.291932	0.463428
	1	-0.561049	0.520496	2.68471	-0.295345	-0.824551	1.18193	-0.0706535	-2.48052	2.17556	0.386773	1.07313	2.32817	1.12447	1.81583	1.93931	1.88329		0.739671	2.61536	0.68576	1.17937	-2.08995	-0.233098	0.735871	1.52687	1.83036	-0.976362		0.805097	0.601385	0.348022	0.437548
VOR	0.1	20.705	12.6805	26.9315	56.1436	59.1332	81.1039	54.332	90.3844	34.0081	92.3057	76.7562	25.195	76.6709	47.0587	65.7348	5.89879			41.6053	11.0564	32.8461	39.5003	58.104	41.5553	32.6142	49.2966	52.6291		51.5651	39.9119	7.00338	4.59818
	0.2	24.2809	13.8025	46.7073	30.56	71.794	25.5493	32.9734	41.4665	51.8109	45.492	49.107	28.6795	39.1501	17.8113	26.3543	25.3931			22.5497	19.6128		5.38515	27.0748	31.7631	28.2699	30.356	28.7036		35.6833	24.2144	3.71592	3.04129
	0.4	35.3707	40.4402	47.6984	39.8612	27.6451	42.5351	26.2618	33.7156	29.8258	37.0696	36.6836	32.2293	30.0138	27.9898	31.1435	32.727			20.2305	17.5862	22.1565	16.9355	23.5294	25.9318	25.107	28.6196	30.5244		34.4507	23.4023	1.49203	1.55691
	0.6	33.6029	24.0429	25.8687	21.2484	20.5292	24.4492	17.7843	25.3937	22.1129	23.8806	30.8944	26.3277	20.5347	31.8497	20.9424	15.7383			13.7111	12.697	31.2213	13.2442	15.9792	18.6134	17.0381	22.2151	23.5544		24.075	18.6971	1.23115	2.01923
	0.8	13.8966	19.6086	18.7555	17.777	17.0006	13.0791	14.4413	16.9042	19.5136	19.3022	18.3571	15.6527	18.6876	20.7147	17.6807	15.7376			10.2572	9.09588	13.0315	9.58942	8.5882	10.2287	14.2778	16.5776	16.2087		17.3193	11.9839	0.556773	1.03399
	1	14.4508	16.2305	7.78499	14.1039	6.72113	16.774	10.0111	4.4021	16.2658	13.9347	17.3201	8.83178	15.4095	18.9596	13.1673	13.4511			12.1461	4.22799	12.6771	5.80713	11.0928	13.1814	10.7372	6.80675	7.74205		12.9886	9.37984	1.05398	1.0952

## Sheet: VOR Reversal Gain+Phase
Gain																															young	old	young	old
		ypr1	ypr2	ypr3	ypr4	ypr5	ypr6	ypr7	ypr8	ypr9	ypr10	ypr11	ypr12	ypr13	ypr14	ypr15	ypr16		apr1	apr2	apr3	apr4	apr5	apr6	apr7	apr8	apr9	apr10	apr11		av	av	sem	sem
decr	0	0.472721	0.374364	0.448217	0.391511	0.414104	0.487939	0.4494	0.517893	0.40847	0.461376	0.414661	0.540037	0.545875	0.650548	0.542729	0.577127			0.679945	0.749704	0.717838	0.737027	0.741898	0.651784	0.666338	0.697977	0.739131	0.744041		0.481061	0.712568	0.0190333	0.0113874
day 1	5	0.307067	0.268298	0.270574	0.290119	0.311837	0.347679	0.428664	0.434462	0.329504	0.390317	0.325342	0.35723	0.341785	0.358388	0.257103	0.399416		0.586884	0.517744	0.68377	0.563291	0.64922	0.605986	0.481586	0.582112	0.543924	0.67974	0.611098		0.338612	0.591396	0.0136986	0.0192861
	10	0.290281	0.213164	0.221418	0.217719	0.202275	0.261859	0.385462	0.348783	0.299272	0.300081	0.224556	0.338389	0.295295	0.28955	0.194397	0.311354		0.51753	0.464958	0.548715	0.41785	0.543725	0.606185	0.477107	0.502141	0.55823	0.664811	0.560552		0.274616	0.532892	0.0143668	0.0206028
	15	0.286585	0.189768	0.200673	0.194671	0.245842	0.286815	0.34508	0.20329	0.269041	0.257837	0.200932	0.296732	0.246174	0.220217	0.235223	0.299984		0.375278	0.511016	0.40311	0.341109	0.510576	0.600497	0.431194	0.519424	0.465179	0.618953	0.510109		0.248679	0.480586	0.0114858	0.0264494
	20	0.200206	0.129542	0.182794	0.18787	0.103546	0.350494	0.367053	0.213461	0.300427	0.211964	0.102622	0.237628	0.22477	0.23936	0.277504	0.244174		0.371105	0.378148		0.527484	0.461743	0.468627	0.422334	0.497667	0.429241	0.537161	0.420689		0.223338	0.45142	0.0191464	0.0181905
	25	0.178568	0.11876	0.16467	0.148131	0.15481	0.281836	0.31592	0.290575	0.225769	0.275566	0.120719	0.202591	0.196104	0.220345	0.255382	0.231615		0.412968	0.389091		0.468212	0.508054	0.434088	0.419117	0.406346	0.419415	0.495943	0.418774		0.211335	0.437201	0.0153412	0.0125958
	30	0.273215	0.114702	0.123698	0.197169	0.126284	0.179382	0.21235	0.163766	0.184896	0.227252	0.123077	0.263699	0.197487	0.204902	0.229884	0.161641		0.26995	0.336625		0.472284	0.509751	0.403012	0.322485	0.410526	0.419909	0.446592	0.424214		0.186463	0.401535	0.0122812	0.0229633
rev2.5	40	0.186124	0.131296	0.204278	0.0457801	0.199399	0.278909	0.185296	0.233024	0.179765	0.192508	0.123664	0.260751	0.203948	0.261033	0.175719	0.230865		0.3942	0.434537	0.536398	0.488721	0.607128	0.510092	0.505808	0.564893	0.511344	0.598674	0.49673		0.193273	0.513502	0.0145475	0.0192176
day 2	45	0.0930789	0.072027	0.0851757	0.0477629	0.0682211	0.17458	0.146074	0.180208	0.124888	0.105178	0.0808928	0.118921	0.0870471	0.0633011	0.0419252	0.0908724		0.116169	0.291746	0.412165	0.308737	0.607951	0.321804	0.343858	0.351119	0.366502	0.502482	0.317246		0.0987596	0.358162	0.0102515	0.0375225
	50	0.075948	0.0609794	0.109591	0.0884535	0.0477041	0.151443	0.079625	0.125267	0.104025	0.207785	0.080838	0.0883649	0.0954841	0.0475939	0.0448262	0.0714351		0.262635	0.292316	0.400376	0.24881	0.551484	0.263148	0.336334	0.326177	0.358608	0.357363	0.342435		0.0924603	0.339972	0.0105307	0.0255325
	55	0.0749992	0.0847189	0.0453235	0.0848096	0.0507821	0.112893	0.111545	0.088084	0.0873046	0.0370661	0.08322	0.0726237	0.0886044	0.0599679	0.0542393	0.102105		0.215204	0.313537	0.468973	0.228457	0.499119	0.258669	0.372671	0.366078	0.308916	0.356506	0.282323		0.0773929	0.333678	0.00568229	0.027495
	60	0.0725359	0.104897	0.0510698	0.163664	0.05386	0.0669376	0.0509832	0.064504	0.0876863	0.0660233	0.132776	0.0568824	0.0817247	0.0613715	0.0863462	0.0905806		0.165854	0.325233	0.347167	0.2021	0.403832	0.201644	0.269692	0.325793	0.268347	0.374512	0.337775		0.0807401	0.292904	0.00777704	0.0233369
	65	0.0650945	0.126835	0.102731	0.219458	0.106704	0.0740558	0.105471	0.0700619	0.0635828	0.146076	0.0902986	0.0745052	0.105124	0.0572383	0.105273	0.154035		0.153612	0.186753	0.331861	0.222245	0.343135	0.241824	0.304556	0.285922	0.263424	0.281164	0.212221		0.104159	0.256974	0.0105237	0.0180438
	70	0.102485	0.148773	0.135689	0.172902	0.0683569	0.0887873	0.0850113	0.0896902	0.105404	0.0639083	0.0854103		0.160921	0.0531051	0.0964132	0.199372			0.210567	0.274536	0.240491	0.330971	0.184915	0.239328	0.241953	0.270646	0.21988	0.245686		0.110415	0.245897	0.0111584	0.01265
rev5	80	0.0700394	0.122643	0.0631258	0.0960634	0.0890123	0.0834578	0.0388557	0.083248	0.0525283	0.0586189	0.0350461	0.0840066	0.0804486	0.0451714	0.0717538	0.0698269		0.337305	0.265013	0.396419	0.305848	0.439986	0.299456	0.417447	0.402437	0.368959	0.386759	0.312533		0.0714904	0.357469	0.00567592	0.01704
day 3	85	0.073154	0.274322	0.0935747	0.0831069	0.118002	0.0908845	0.0472211	0.0622459	0.0766295	0.0604024	0.156494	0.098873	0.159622	0.081375	0.0955118	0.12687		0.167208	0.16608	0.374763	0.174607	0.24835	0.191076	0.25297	0.185176	0.262613	0.262238	0.203716		0.106143	0.226254	0.0137539	0.018849
	90	0.125219	0.268439	0.103509	0.195458	0.132979	0.0983046	0.106081	0.0795143	0.117789	0.0816039	0.177532	0.0768104	0.189549	0.106368	0.12396	0.167326		0.149757	0.165165	0.302727	0.168782	0.184163	0.0944861	0.205997	0.146577	0.240703	0.280337	0.190248		0.134403	0.19354	0.0130883	0.018411
	95	0.145041	0.233422	0.0925045	0.224942	0.17083	0.121424	0.0944359	0.113254	0.0724254	0.0769786	0.231929	0.172977	0.229073	0.206066	0.145665	0.157582		0.125106	0.155633	0.328275	0.17359	0.20743	0.0741432	0.248563	0.192515	0.238888	0.284424	0.159221		0.155534	0.19889	0.0143129	0.0220182
	100	0.0922586	0.361072	0.162248	0.253978	0.158891	0.164747	0.106763	0.152243	0.210407	0.0656908	0.284208	0.103156	0.251877	0.142721	0.147366	0.149898		0.129489	0.120746	0.169676	0.189517	0.217997	0.151391	0.231233	0.196154	0.185898	0.222859	0.113737		0.17547	0.175336	0.0195832	0.0125882
	105	0.144015	0.358142	0.34547	0.297181	0.0813281	0.192339	0.0967827	0.172864	0.161023	0.0544031	0.336486	0.200948	0.242946	0.135317	0.169474	0.193522		0.173306	0.0755394	0.201216	0.152353	0.212966	0.12266	0.230022	0.314094	0.326737	0.214174	0.120746		0.19889	0.194892	0.0235062	0.0235102
	110	0.158994	0.356185	0.273131	0.20741	0.224204	0.229533	0.117421	0.0860928	0.111638	0.119727	0.232199	0.234632	0.290076	0.154939	0.184764	0.197523		0.157262	0.0912477	0.232757	0.137179	0.232735	0.158323	0.177968	0.177527	0.194801	0.156424	0.108685		0.198654	0.165901	0.0182085	0.0134658
rev5-2	120	0.12335	0.230159	0.140014	0.194003	0.118937	0.134726	0.085462	0.212219	0.131092	0.145077	0.218521	0.160181	0.204063	0.0984601	0.124637	0.136709		0.146398	0.136857	0.348691	0.234858	0.28235	0.168301	0.296742	0.25213	0.349619	0.264606	0.174427		0.153601	0.241362	0.011139	0.0230498
day 4	125	0.177386	0.305879	0.238602	0.300419	0.191118	0.173422	0.101632	0.121981	0.131718	0.131599	0.324654	0.136543	0.1998	0.133553	0.179409	0.187266		0.202427	0.117236	0.170834	0.154056	0.187524	0.101992	0.152351	0.107807	0.196759	0.152229	0.171453		0.189686	0.155879	0.0173265	0.0104632
	130	0.194361	0.301803	0.190515	0.148831	0.237773	0.141237	0.11207	0.159545	0.25804	0.146698	0.31141	0.185332	0.272692	0.144203	0.202867	0.210997		0.249167	0.0882763	0.242013	0.211326	0.237785	0.139903	0.193589	0.107307	0.172003	0.204193	0.18738		0.201148	0.184813	0.0150962	0.0162058
	135	0.149498	0.285947	0.258092	0.216378	0.231978	0.244102	0.152578	0.174612	0.2552	0.091918	0.313499	0.175454	0.185593	0.125451	0.134477	0.146016		0.197176	0.226414	0.216875	0.225883	0.224705	0.190621	0.16149	0.212971	0.214402	0.175625	0.137319		0.1963	0.198498	0.0158651	0.00890123
	140	0.161441	0.32191	0.288834	0.216598	0.229593	0.27384	0.0796288	0.17028	0.108951	0.116241	0.308078	0.234472	0.411202	0.143375	0.19798	0.20721		0.219116	0.197845	0.151245	0.204575	0.228687	0.164476	0.170113	0.15416	0.175084	0.1876	0.0519106		0.216852	0.173165	0.0221469	0.0143435
	145	0.192417	0.502175	0.271271	0.224782	0.145931	0.342308	0.127684	0.171044	0.206527	0.26188	0.367563	0.27124	0.226312	0.155531	0.325911	0.154617		0.373484	0.120168	0.134759	0.289697	0.243786	0.175966	0.271177	0.19547	0.266295	0.135907	0.205436		0.2467	0.219286	0.024918	0.023509
	150	0.231112	0.406803	0.328985	0.299513	0.179531	0.364801	0.165674	0.221243	0.288374	0.150586	0.357165	0.258026	0.199226	0.163537	0.186058	0.178055		0.272328	0.170551	0.145798	0.331637	0.199542	0.187457	0.179686	0.183545	0.192463	0.0957442	0.191741		0.248668	0.195499	0.0206066	0.0185808
rev5-3	160		0.266451	0.207322		0.205697	0.171564	0.115665	0.196069	0.148059	0.220305	0.233571	0.201747	0.232009	0.18499	0.258376	0.13946		0.225726	0.122683	0.227909	0.181095	0.182294	0.150851	0.307255	0.218082	0.267398	0.21017	0.179725		0.198663	0.206653	0.0117146	0.0156396
day 5	165		0.27083	0.305546		0.231798	0.209501	0.104869	0.182831	0.224706	0.179484	0.286347	0.163927	0.279136	0.229474	0.233565	0.158963		0.21755	0.203392	0.153347	0.163777	0.167468	0.264055	0.162417	0.218939	0.205619	0.219484	0.212531		0.218641	0.198962	0.0150946	0.0101341
	170		0.292882	0.271343		0.233312	0.247438	0.160791	0.207247	0.165868	0.169123	0.403586	0.228085	0.329096	0.255274	0.178663	0.133496		0.311114	0.2087	0.274032	0.231799	0.204739	0.237271	0.162426	0.277216	0.158718	0.236644	0.191686		0.234015	0.226759	0.0198099	0.0144409
	175		0.256067	0.312795		0.230855	0.227282	0.131468	0.214568	0.227922	0.160306	0.402954	0.446448	0.275327	0.192166	0.178419	0.149869		0.28443	0.209612	0.174492	0.10612	0.163236	0.244444	0.151772	0.171425	0.135634	0.239006	0.273235		0.243317	0.195764	0.0244947	0.017577
	180		0.304705	0.285147		0.197265	0.241264	0.10215	0.160739	0.255156	0.183491	0.329742	0.295848	0.349027	0.181911	0.205382	0.165842		0.307943	0.344194	0.145772	0.32294	0.177662	0.254565	0.1876	0.204736	0.168779	0.222811	0.142734		0.232691	0.225431	0.0194914	0.0217029
	185		0.284262	0.314977		0.185889	0.280862	0.207206	0.225495	0.178391	0.118618	0.462906	0.215896	0.396925	0.353657	0.17539	0.145779		0.423398	0.108125	0.133578	0.291946	0.211555	0.294594	0.16813	0.199192	0.161131	0.241697	0.131591		0.253304	0.214994	0.0267651	0.0280855
	190		0.255596	0.344951		0.192677	0.254812	0.0886268	0.140066	0.199457	0.111055	0.413698	0.241066	0.383921	0.26094	0.226512	0.108596		0.357724	0.267053	0.162858	0.307986	0.214514	0.281144	0.150501	0.131515	0.133549	0.205277	0.0540189		0.230141	0.206013	0.0269615	0.0272539
CONSOLIDATION
day 1-2		143.654	93.6093	75.1693	177.898	74.5972	67.7442	111.413	80.4425	102.295	114.84	99.7985	101.067	98.1455	87.4045	117.314	83.339		60.7961	71.4809	61.5434	93.3064	57.1546	68.4024	44.3293	39.656	67.1178	48.0131	77.3264		101.796	62.6478	6.99527	4.67072
Phase
		ypr1	ypr2	ypr3	ypr4	ypr5	ypr6	ypr7	ypr8	ypr9	ypr10	ypr11	ypr12	ypr13	ypr14	ypr15	ypr16		apr1	apr2	apr3	apr4	apr5	apr6	apr7	apr8	apr9	apr10	apr11		young	old
decr	0	22.4697	29.6385	27.2621	25.9512	22.4444	20.2663	17.5557	20.3327	17.8306	19.8527	23.811	24.4909	22.6682	20.4162	21.7916	18.0252			12.2205	13.0589	12.697	14.4851	16.7556	16.7132	18.346	17.7725	16.3564	14.6434		22.1754	15.3049	0.85972	0.691212
day 1	5	25.5517	32.2371	24.8846	25.1319	18.8395	17.3	17.5048	23.7566	19.616	23.8679	26.3263	24.4351	25.71	18.9551	25.4269	20.5518		13.3574	10.1808	13.811	17.4093	16.6471	14.814	17.3531	11.8699	19.6164	13.929	17.082		23.131	15.0973	1.00238	0.841601
	10	38.2913	30.9501	25.5624	33.4984	25.2682	28.817	18.8366	25.6792	22.3653	28.4217	31.296	24.4275	22.6875	22.8991	24.6208	19.229		12.8728	12.7944	17.0441	20.5964	19.9094	11.4596	18.9481	20.4119	19.0646	17.6921	16.6937		26.4281	17.0443	1.30205	0.98658
	15	25.7171	35.5818	22.9125	37.7143	22.0822	36.6497	17.3068	23.499	25.1146	22.2813	21.2265	25.5443	13.5489	22.3873	22.6649	17.0994		13.8577	12.3977	17.3299	32.2062	23.7046	13.4999	23.2571	19.1675	21.3253	20.3557	25.1647		24.4582	20.206	1.71663	1.77613
	20	33.3934	45.8099	31.1999	31.7272	30.6756	21.9624	12.2114	28.6774	33.769	23.4491	33.0365	30.7366	13.5052	20.7992	23.2136	25.6638		19.8965	16.9563		12.8143	21.7822	19.8412	20.8469	21.4543	24.8162	21.0668	12.2108		27.4894	19.1685	2.07842	1.26945
	25	25.2379	29.0196	31.911	28.4061	19.1031	20.3694	20.0626	26.9642	22.8511	26.4561	28.7348	30.0466	33.0298	23.3627	24.725	19.5347		15.8881	16.8645		17.2905	21.5688	19.913	20.3673	24.1722	26.4185	23.941	23.6826		25.6134	21.0106	1.11293	1.12629
	30	23.0078	44.7874	31.4611	28.1132	32.0498	23.1792	34.101	31.9468	30.239	27.2435	26.9287	26.4585	22.7278	30.4202	20.8422	21.1534		27.1302	12.1388		20.406	20.9455	22.7198	24.5254	26.7481	26.447	22.71	26.2082		28.4162	22.9979	1.51282	1.4325
rev2.5	40	27.7595	42.4849	36.1887	45.1381	29.4035	26.8158	24.2371	35.3567	43.2493	35.9507	43.4658	36.6811	28.3293	25.9556	29.8736	30.9769		30.3127	15.3232	16.5807	17.2916	14.454	13.6761	17.1595	20.4535	21.8756	18.4623	19.5993		33.8667	18.6535	1.73034	1.38949
day 2	45	46.4593	60.5584	52.4544	130.317	37.7563	37.2005	30.299	42.3841	65.1075	32.161	57.3103	54.1884	91.4732	43.2404	81.6561	57.0334		33.4407	16.2732	16.1385	23.8968	17.3286	22.7997	23.7704	24.3195	25.4028	21.9419	33.0083		57.4749	23.4837	6.41658	1.76112
	50	75.6511	98.8608	72.6924	171.822	64.9977	42.6162	65.6334	48.2723	70.6154	20.4799	139.092	62.5593	99.3988	48.2473	175.831	136.782		35.3214	22.2325	20.3497	32.9921	24.1816	19.584	28.3732	30.1853	21.2334	29.316	36.68		87.097	27.3136	11.5665	1.85452
	55	87.5409	148.054	103.186	174.29	107.305	76.2916	39.5854	94.9759	76.5182	35.8641	157.32	77.2414	127.792	88.2629	105.437	143.231		34.1257	20.5926	16.7762	41.1413	29.4241	41.2783	22.5443	26.1236	26.1269	30.945	34.5246		102.681	29.4184	9.88398	2.40323
	60	104.837	154.428	121.476	171.616	149.613	98.0206	62.9117	119.739	42.9497	64.6907	182.943	91.9234	156.185	100.178	160.232	147.362		40.9792	15.3257	29.9525	42.7167	26.3849	36.3028	35.4843	30.5412	38.5451	29.3742	32.7414		120.569	32.5771	10.5101	2.31326
	65	150.696	162.492	152.615	184.135	159.907	100.864	44.1001	70.4214	70.7413	50.3851	155.797	119.465	165.117	119.261	177.994	178.956		44.2946	34.3447	32.4412	53.1711	29.3419	41.3403	28.8246	35.5224	33.6663	32.5661	51.0677		128.934	37.871	11.9469	2.53947
	70	155.136	170.556	177.889	179.675	170.571	93.4324	47.5162	153.879	83.8075	80.7885	178.545		179.872	138.344	169.133	173.692			34.2429	34.8416	43.1604	35.2096	37.3446	42.5402	38.2603	38.4069	35.1173	42.2753		143.522	38.1399	11.4561	1.08615
rev5	80	106.688	146.163	106.063	146.17	74.0764	64.4106	56.6651	102.161	104.46	89.4938	152.728	59.2484	102.395	106.493	94.9355	103.481		30.1377	23.1631	17.4112	30.5745	28.8067	27.4101	23.6213	19.7661	24.6604	27.4361	30.4498		100.977	25.767	7.30495	1.3393
day 3	85	163.214	178.726	131.361	134.463	171.097	140.05	98.024	128.399	134.786	128.566	176.138	142.495	173.894	186.247	181.643	157.584		57.9783	27.148	23.2065	66.0739	31.4862	24.6697	27.6358	32.5838	32.1564	40.6738	62.7472		151.668	38.76	6.33453	4.79407
	90	169.968	174.745	169.229	179.272	186.281	169.766	168.09	154.703	176.186	156.491	177.064	159.747	179.873	164.634	190.212	175.2		68.7121	35.243	36.6483	66.139	47.7269	57.7151	31.9156	60.8759	30.5908	44.3227	61.4109		171.966	49.2091	2.48965	4.31588
	95	172.145	178.004	164.188	176.944	181.129	163.286	168.592	146.18	122.662	169.002	155.947	164.469	180.359	186.364	184.264	178.599		143.638	39.6104	24.8883	60.5199	49.7598	89.7417	23.9847	77.9701	29.5088	50.2981	66.4808		168.258	59.6728	4.06347	10.5823
	100	133.646	183.016	174.276	185.471	176.85	184.269	152.453	167.056	175.482	157.161	166.938	160.998	178.558	169.885	181.7	171.62		141.785	32.8858	45.075	77.0011	40.7507	65.7524	39.7528	43.1376	45.1087	54.1483	75.3778		169.961	60.0704	3.42402	9.30594
	105	173.431	179.638	183.673	184.411	174.624	180.35	164.418	168.212	177.821	145.321	177.929	176.005	183.197	167.717	184.09	184.996		94.362	85.6811	44.308	89.1644	53.4175	65.5097	32.4701	50.533	25.8586	54.3622	63.2375		175.365	59.9004	2.56058	6.7864
	110	165.034	184.274	186.037	185.415	185.927	186.803	173.408	138.986	180.16	173.801	177.744	180.24	183.972	175.508	177.046	167.406		70.1297	118.28	43.5411	101.504	49.9493	72.5668	60.7953	60.5292	43.7356	45.2273	100.799		176.36	69.7325	2.99301	7.89589
rev5-2	120	149.428	173.074	163.835	174.716	177.466	167.474	143.166	158.89	164.856	162.222	169.357	161.127	175.696	152.025	183.998	162.701		167.429	68.4253	36.9695	55.2684	45.8297	40.9943	34.6612	49.5401	27.1403	36.5598	68.6633		165.002	57.4074	2.71549	11.7197
day 4	125	159.073	177.615	176.186	182.588	179.433	180.193	164.37	153.868	173.33	175.12	186.082	174.462	177.98	161.814	201.285	171.251		130.385	94.2029	62.0304	137.901	67.4364	146.135	46.4961	108.35	27.9599	60.7825	114.191		174.666	90.5336	2.84126	12.0226
	130	164.538	170.499	169.694	175.875	187.798	180.997	171.52	153.453	181.017	159.319	176.659	175.031	180.213	173.151	187.392	172.194		142.591	108.784	38.6017	128.4	69.0448	144.528	59.4888	124.199	43.9995	66.7075	87.5728		173.709	92.1743	2.31392	11.8169
	135	173.866	179.757	168.835	180.137	187.477	181.285	166.8	178.641	180.633	116.21	172.186	188.013	180.754	169.008	184.36	166.262		130.147	102.317	55.4763	145.357	85.5761	143.787	61.9309	144.894	50.1686	87.5402	109.372		173.389	101.506	4.19361	10.9732
	140	166.873	181.176	178.929	181.57	185.582	181.823	147.597	158.058	143.221	149.477	181.609	184.688	185.97	171.068	178.94	162.701		145.571	134.192	89.9654	134.042	123.498	162.018	53.6373	102.561	66.3431	77.6739	116.66		171.205	109.651	3.66874	10.4203
	145	176.067	184.828	179.331	174.438	181.94	188.514	176.477	157.715	164.923	183.667	183.326	186.804	186.571	177.056	191.76	165.474		151.261	118.719	74.4498	124.044	94.523	168.475	46.9977	105.683	53.1053	95.326	162.518		178.681	108.646	2.35129	12.4596
	150	174.251	179.152	181.974	182.43	177.089	183.173	174.842	179.303	178.755	175.209	184.328	188.625	173.467	166.884	176.011	172.865		158.896	151.608	70.4108	158.13	95.6021	174.931	57.9462	156.393	58.081	101.887	159.159		178.022	122.095	1.33197	13.7708
rev5-3	160		172.91	175.561		173.937	174.816	168.053	168.408	173.609	172.663	177.427	167.57	176.238	184.326	188.35	162.292		130.06	135.015	44.2676	96.8928	65.264	106.763	41.6775	98.1829	45.6938	68.3766	97.1649		174.012	84.4872	1.78609	10.0962
day 5	165		186.611	175.382		172.512	178.224	175.883	161.718	176.759	179.426	177.857	181.95	181.403	180.809	182.412	168.12		145.014	161.998	67.2599	146.673	115.879	174.306	75.1561	157.473	33.1058	102.941	162.766		177.076	122.052	1.69774	14.1061
	170		188.191	182.72		182.12	181.632	178.392	170.892	176.614	173.607	179.586	173.171	177.364	178.363	174.921	154.067		157.252	166.964	35.2257	159.354	130.237	165.791	86.9973	151.942	48.5999	107.171	168.071		176.546	125.237	2.10601	14.7437
	175		188.259	183.55		180.957	179.757	184.324	173.271	179.864	167.626	185.071	183.351	170.887	170.149	175.116	165.825		152.955	161.12	91.1037	141.294	144.023	179.697	91.7293	150.943	59.2024	82.6688	158.26		177.715	128.454	1.91525	11.9584
	180		181.263	177.761		178.242	178.782	167.04	170.012	180.079	175.431	182.716	172.389	184.12	174.407	183.546	153.415		156.381	174.844	104.568	166.786	96.629	168.905	86.6945	151.005	54.0236	106.241	158.658		175.657	129.521	2.18467	12.3606
	185		187.171	182.15		165.124	187.418	189.084	171.064	171.975	163.023	181.233	178.462	184.742	185.171	169.246	155.886		168.4	158.006	119.184	169.959	137.343	177.363	93.7813	152.972	64.436	71.2614	169.581		176.553	134.753	2.80435	12.4959
	190		174.048	178.814		173.766	179.728	171.444	156.832	176.369	168.402	181.863	177.208	179.268	177.81	181.265	149.004		168.384	166.022	109.918	165.386	123.696	169.522	56.2424	123.784	81.9566	93.9868	160.509		173.273	129.037	2.54503	12.0727
CONSOLIDATION
day 2-3		61.9651	80.9532	49.311	75.0964	31.6452	56.4345	139.301	56.3645	150.921	119.415	80.8874	27.2605	48.8746	71.6598	46.7199	50.8033		-1.25158	41.4378	4.54772	51.3473	69.1507	58.0267	25.4594	-3.86074	16.8453	53.8805	47.8502		71.7258	33.0394	9.02066	7.77922
day 3-4		73.2526	70.6133	72.239	72.7386	92.4351	84.2072	74.0948	154.05	79.7836	86.2664	66.4745	84.2034	89.8555	65.9738	108.467	92.6404		120.961	47.5857	74.8502	34.8148	80.5152	30.0822	29.6981	73.0417	13.0009	51.2821	54.3194		85.4559	55.4683	5.38705	9.15558

## Sheet: VOR Reversal Polar Plot
X																														X
		ypr1	ypr2	ypr3	ypr4	ypr5	ypr6	ypr7	ypr8	ypr9	ypr10	ypr11	ypr12	ypr13	ypr14	ypr15	ypr16		apr1	apr2	apr3	apr4	apr5	apr6	apr7	apr8	apr9	apr10	apr11		young	old
decr	0	0.436832	0.325383	0.398429	0.352034	0.382736	0.457732	0.428469	0.485624	0.38885	0.433956	0.379366	0.491448	0.503707	0.609683	0.503945	0.548802			0.664537	0.730315	0.700284	0.713598	0.710399	0.62425	0.63247	0.664666	0.709218	0.719873		0.445437	0.686961
day 1	5	0.277035	0.22694	0.245453	0.262654	0.295131	0.33195	0.408813	0.397648	0.31038	0.356937	0.291598	0.325233	0.307949	0.338954	0.232199	0.373995		0.571007	0.509592	0.664001	0.537488	0.62201	0.585843	0.459667	0.569665	0.512355	0.659752	0.584139		0.311429	0.570502
	10	0.227833	0.182813	0.199744	0.181556	0.182921	0.229431	0.364817	0.314335	0.27676	0.263911	0.191882	0.308098	0.272446	0.266731	0.176723	0.293984		0.504523	0.453414	0.524616	0.391142	0.511228	0.594101	0.451254	0.470612	0.527612	0.633368	0.536927		0.245874	0.508981
	15	0.258198	0.154335	0.184841	0.153998	0.227808	0.230112	0.329457	0.186431	0.243606	0.238586	0.1873	0.267727	0.239323	0.203619	0.217058	0.286724		0.364355	0.4991	0.384811	0.288624	0.467499	0.583906	0.396156	0.490628	0.433328	0.5803	0.461694		0.22557	0.450037
	20	0.167154	0.0902961	0.156356	0.159795	0.089057	0.325058	0.358748	0.187277	0.24974	0.194459	0.0860306	0.204247	0.218554	0.223761	0.255037	0.220086		0.348953	0.361709		0.514346	0.428775	0.440808	0.394686	0.463184	0.389604	0.501259	0.411171		0.199104	0.42545
	25	0.161523	0.10385	0.139784	0.130295	0.146285	0.264213	0.296749	0.258986	0.20805	0.246708	0.105853	0.175366	0.164411	0.202279	0.23197	0.218284		0.397192	0.372357		0.447053	0.472478	0.408134	0.392914	0.370718	0.375615	0.453274	0.383506		0.190913	0.407324
	30	0.251482	0.0814071	0.105514	0.173906	0.107037	0.164902	0.175837	0.138962	0.159737	0.202043	0.109732	0.236078	0.182153	0.176694	0.214841	0.150749		0.240248	0.329099		0.442646	0.476067	0.37174	0.29339	0.366597	0.375964	0.411968	0.380603		0.164442	0.368832
rev2.5	40	0.164703	0.0968252	0.164868	0.0322933	0.173713	0.248916	0.168963	0.190046	0.130937	0.155839	0.0897538	0.209115	0.179523	0.234704	0.152371	0.197938		0.340307	0.41909	0.514094	0.466633	0.587911	0.495629	0.483293	0.52928	0.474524	0.567862	0.46795		0.161907	0.486052
day 2	45	0.0641192	0.0354038	0.0519054	-0.030903	0.0539371	0.139057	0.126121	0.133109	0.0525676	0.0890388	0.0436893	0.0695834	-0.00223796	0.0461139	0.00608398	0.0494483		0.0969382	0.280057	0.395922	0.282271	0.580357	0.29666	0.314688	0.319962	0.331066	0.466084	0.26604		0.0579398	0.330004
	50	0.0188219	-0.00939291	0.0326034	-0.0875541	0.0201624	0.111448	0.0328512	0.0833767	0.0345268	0.194652	-0.0610941	0.0407212	-0.0155931	0.0316936	-0.0447076	-0.052059		0.21429	0.270584	0.375387	0.208688	0.503092	0.247925	0.295931	0.281949	0.334263	0.311597	0.274628		0.0206535	0.301667
	55	0.00321789	-0.0718883	-0.0103388	-0.0843888	-0.0151057	0.0267535	0.0859651	-0.00764005	0.0203539	0.0300387	-0.0767849	0.0160385	-0.0542964	0.00181788	-0.0144375	-0.0817919		0.178148	0.293504	0.449014	0.172048	0.434736	0.194394	0.344193	0.328682	0.277352	0.305761	0.232601		-0.0145304	0.291858
	60	-0.0185746	-0.0946218	-0.0266654	-0.161915	-0.0464611	-0.00933969	0.0232158	-0.0319973	0.0641822	0.0282253	-0.1326	-0.00190921	-0.0747661	-0.0108446	-0.0812579	-0.0762774		0.125211	0.313668	0.300799	0.148486	0.361764	0.162505	0.219603	0.280593	0.209879	0.326363	0.284109		-0.0407254	0.248453
	65	-0.0567648	-0.12096	-0.0912179	-0.218887	-0.10021	-0.0139583	0.0757414	0.0234777	0.0209718	0.0931419	-0.0823612	-0.0366487	-0.101598	-0.0279774	-0.105208	-0.154009		0.109949	0.154194	0.280071	0.13322	0.299115	0.181561	0.266822	0.232709	0.219242	0.236957	0.13336		-0.0560292	0.204291
	70	-0.0929847	-0.146757	-0.135597	-0.1729	-0.0674335	-0.00531581	0.0574151	-0.0805295	0.0113699	0.0102304	-0.0853827		-0.160921	-0.0396775	-0.0946842	-0.198164			0.174067	0.225322	0.175424	0.270419	0.147008	0.176338	0.189983	0.212083	0.179857	0.181788		-0.0800887	0.193229
rev5	80	-0.0201128	-0.10187	-0.0174662	-0.0797996	0.024421	0.036047	0.0213524	-0.0175369	-0.0131166	0.000517868	-0.0311503	0.042954	-0.0172682	-0.0128242	-0.00617322	-0.0162779		0.291709	0.24365	0.378255	0.263326	0.385538	0.265837	0.382471	0.378726	0.335309	0.343258	0.269426		-0.013019	0.321591
day 3	85	-0.0700368	-0.274254	-0.0618341	-0.0582117	-0.11658	-0.0696723	-0.00659145	-0.0386627	-0.0539825	-0.0376561	-0.156139	-0.078436	-0.158717	-0.0808919	-0.0954725	-0.117283		0.0886604	0.147783	0.344441	0.0708133	0.211784	0.173636	0.22411	0.15603	0.222328	0.19889	0.0932851		-0.0921514	0.175615
	90	-0.123304	-0.267311	-0.101685	-0.195442	-0.132181	-0.0967405	-0.103797	-0.071889	-0.117529	-0.0748305	-0.177299	-0.0720617	-0.189549	-0.102566	-0.121996	-0.166739		0.0543699	0.134892	0.242882	0.0682755	0.12388	0.0504678	0.174856	0.0713395	0.207203	0.200558	0.0910384		-0.132183	0.129069
	95	-0.14368	-0.23328	-0.089004	-0.224623	-0.170797	-0.116295	-0.0925702	-0.0940907	-0.039087	-0.0755647	-0.21179	-0.166661	-0.229069	-0.204796	-0.145262	-0.157535		-0.100747	0.119899	0.297788	0.0854274	0.133998	0.000334226	0.227101	0.0401244	0.207899	0.181688	0.0635381		-0.149632	0.114277
	100	-0.0636775	-0.360572	-0.161439	-0.252821	-0.158651	-0.16429	-0.0946602	-0.148375	-0.209754	-0.0605408	-0.276854	-0.0975351	-0.251798	-0.140502	-0.147301	-0.148298		-0.101739	0.101397	0.119822	0.0426286	0.165145	0.0621733	0.177774	0.143136	0.1312	0.130526	0.0287123		-0.171067	0.0909796
	105	-0.143069	-0.358135	-0.34476	-0.296301	-0.0809704	-0.192336	-0.0932258	-0.169219	-0.160906	-0.0447386	-0.336266	-0.200459	-0.242568	-0.132219	-0.169043	-0.192786		-0.0131813	0.00568863	0.143989	0.00222182	0.126923	0.0508475	0.194063	0.199649	0.294022	0.12479	0.0543709		-0.197313	0.10758
	110	-0.153601	-0.355194	-0.271617	-0.206484	-0.223006	-0.227917	-0.116644	-0.0649611	-0.111638	-0.119027	-0.232019	-0.23463	-0.289379	-0.154463	-0.184519	-0.19277		0.0534522	-0.0432321	0.168721	-0.0273583	0.149757	0.0474325	0.0868364	0.08734	0.140751	0.110169	-0.0203644		-0.196117	0.0685004
rev5-2	120	-0.106203	-0.22848	-0.134479	-0.193178	-0.118821	-0.131519	-0.0684013	-0.197977	-0.126539	-0.13815	-0.214762	-0.151569	-0.203488	-0.0869549	-0.124333	-0.130525		-0.142889	0.0503242	0.278589	0.133806	0.196739	0.127029	0.244079	0.163611	0.311123	0.212541	0.0634648		-0.147211	0.148947
day 4	125	-0.165685	-0.305614	-0.238073	-0.300112	-0.191109	-0.173421	-0.0978739	-0.109513	-0.130827	-0.131122	-0.322827	-0.135906	-0.199676	-0.126882	-0.167171	-0.185087		-0.131157	-0.00859213	0.0801216	-0.114307	0.0719546	-0.0846891	0.104879	-0.0339397	0.173792	0.074307	-0.0702578		-0.186306	0.00564652
	130	-0.187326	-0.297663	-0.187441	-0.148445	-0.235574	-0.141215	-0.110845	-0.142723	-0.257999	-0.137245	-0.310881	-0.184636	-0.27269	-0.143174	-0.201182	-0.209042		-0.197918	-0.0284254	0.189134	-0.131264	0.0850411	-0.113937	0.0982863	-0.0603131	0.12373	0.0807429	0.00793555		-0.198005	0.0048192
	135	-0.148642	-0.285944	-0.253207	-0.216378	-0.230005	-0.244041	-0.148546	-0.174563	-0.255185	-0.0405963	-0.310589	-0.173741	-0.185577	-0.12315	-0.134088	-0.141838		-0.12713	-0.048299	0.122913	-0.185835	0.0173324	-0.153798	0.0759871	-0.174229	0.137331	0.0075375	-0.0455496		-0.191631	-0.0339763
	140	-0.157223	-0.321843	-0.288783	-0.216517	-0.228504	-0.273701	-0.0672307	-0.157946	-0.0872651	-0.100133	-0.307956	-0.233688	-0.408972	-0.141636	-0.197946	-0.197838		-0.180732	-0.13791	9.12945e-05	-0.142218	-0.126215	-0.156442	0.100859	-0.0335267	0.0702539	0.0400481	-0.023292		-0.211699	-0.053553
	145	-0.191964	-0.500394	-0.271252	-0.223723	-0.145848	-0.338535	-0.127442	-0.158268	-0.199418	-0.261344	-0.366944	-0.26933	-0.224826	-0.155326	-0.31907	-0.149675		-0.327479	-0.0577426	0.0361267	-0.162181	-0.0192247	-0.172418	0.18495	-0.0528381	0.159869	-0.0126151	-0.195948		-0.24396	-0.0563182
	150	-0.22995	-0.406758	-0.32879	-0.299244	-0.1793	-0.364241	-0.165003	-0.221227	-0.288306	-0.15006	-0.356147	-0.255108	-0.197932	-0.159271	-0.185607	-0.176676		-0.254061	-0.150037	0.0488822	-0.307768	-0.0194793	-0.186724	0.0953624	-0.168184	0.101759	-0.0197211	-0.179195		-0.247726	-0.0944697
rev5-3	160		-0.264413	-0.2067		-0.204546	-0.170862	-0.11316	-0.19207	-0.147139	-0.218501	-0.233336	-0.197018	-0.231509	-0.184463	-0.255637	-0.132852		-0.145275	-0.0867734	0.163203	-0.0217336	0.0762788	-0.0435075	0.229489	-0.0310405	0.186775	0.0774486	-0.0224162		-0.196586	0.034768
day 5	165		-0.269029	-0.304555		-0.229821	-0.2094	-0.104598	-0.173602	-0.224347	-0.179475	-0.286147	-0.163832	-0.279053	-0.229451	-0.233358	-0.155558		-0.178237	-0.193436	0.0592765	-0.136844	-0.0730957	-0.262752	0.0416092	-0.202233	0.172239	-0.0491514	-0.202989		-0.217302	-0.0932376
	170		-0.289894	-0.271037		-0.233153	-0.247338	-0.160727	-0.204635	-0.165579	-0.168071	-0.403576	-0.226467	-0.328748	-0.25517	-0.177962	-0.120054		-0.286913	-0.203321	0.223853	-0.216912	-0.132251	-0.230012	0.00850835	-0.244636	0.104962	-0.0698632	-0.187546		-0.232315	-0.112194
	175		-0.253411	-0.312195		-0.230822	-0.22728	-0.131094	-0.21309	-0.227921	-0.156582	-0.401377	-0.445684	-0.271852	-0.189332	-0.177772	-0.145306		-0.253327	-0.198334	-0.00336101	-0.0828123	-0.1321	-0.244441	-0.00458004	-0.149849	0.0694454	0.0304982	-0.2538		-0.241694	-0.111151
	180		-0.304631	-0.28493		-0.197172	-0.241209	-0.0995484	-0.158303	-0.255155	-0.182908	-0.329372	-0.293241	-0.348125	-0.181045	-0.204988	-0.148308		-0.282148	-0.342801	-0.0366669	-0.31439	-0.0205095	-0.249807	0.0108168	-0.179074	0.0991493	-0.0623164	-0.132946		-0.230638	-0.137336
	185		-0.282038	-0.314755		-0.179658	-0.278511	-0.204607	-0.222758	-0.176644	-0.113449	-0.462799	-0.215818	-0.395566	-0.352217	-0.172309	-0.133057		-0.41475	-0.100256	-0.0651347	-0.287474	-0.155583	-0.294283	-0.0110879	-0.177437	0.069531	0.0776454	-0.129421		-0.250299	-0.135295
	190		-0.254218	-0.344877		-0.191538	-0.254809	-0.0876405	-0.12877	-0.199057	-0.108788	-0.413479	-0.24078	-0.38389	-0.260749	-0.226457	-0.0930888		-0.350398	-0.259145	-0.055482	-0.298022	-0.11901	-0.276456	0.0836305	-0.0731295	0.0186866	-0.0142721	-0.0509232		-0.227724	-0.126775
Y																														Y
		ypr1	ypr2	ypr3	ypr4	ypr5	ypr6	ypr7	ypr8	ypr9	ypr10	ypr11	ypr12	ypr13	ypr14	ypr15	ypr16		apr1	apr2	apr3	apr4	apr5	apr6	apr7	apr8	apr9	apr10	apr11
decr	0	0.180672	0.185132	0.205311	0.171327	0.158099	0.169014	0.135553	0.179953	0.125075	0.156685	0.167407	0.223871	0.210377	0.226936	0.201478	0.178584			0.143927	0.169398	0.157778	0.184351	0.213882	0.187441	0.209733	0.213049	0.208148	0.188096		0.179717	0.170527
day 1	5	0.132446	0.143117	0.113855	0.123215	0.100698	0.103391	0.128936	0.175024	0.110619	0.157934	0.144283	0.147773	0.148272	0.116414	0.11039	0.140217		0.135585	0.091514	0.16323	0.168534	0.185986	0.154939	0.143637	0.119735	0.182607	0.163626	0.179504		0.131036	0.153536
	10	0.179875	0.109628	0.0955404	0.120162	0.0863422	0.12622	0.124454	0.151139	0.113876	0.142826	0.116648	0.139938	0.113897	0.112667	0.080988	0.102543		0.1153	0.102967	0.160833	0.146993	0.185157	0.120435	0.154922	0.17513	0.182337	0.202037	0.161022		0.119796	0.155194
	15	0.124357	0.110419	0.0781271	0.119085	0.0924207	0.171206	0.102657	0.0810586	0.114189	0.0977602	0.0727487	0.127953	0.0576724	0.0838729	0.0906411	0.0882043		0.0898833	0.109713	0.120076	0.1818	0.205262	0.140182	0.17026	0.170543	0.169168	0.215302	0.21691		0.100773	0.162645
	20	0.110191	0.0928857	0.0946921	0.0987966	0.052827	0.131084	0.0776389	0.102435	0.166991	0.0843477	0.055947	0.12145	0.0524913	0.084995	0.109381	0.105749		0.126295	0.110284		0.116992	0.171343	0.159059	0.150297	0.182027	0.180156	0.193086	0.0889796		0.0963689	0.134411
	25	0.0761373	0.0576117	0.0870449	0.0704683	0.0506645	0.098099	0.108375	0.131756	0.0876747	0.122768	0.0580362	0.101438	0.106891	0.0873778	0.106817	0.0774469		0.113054	0.112879		0.13916	0.18677	0.147848	0.145868	0.166391	0.186608	0.201252	0.168209		0.089288	0.142549
	30	0.106788	0.0808051	0.0645604	0.0929087	0.0670137	0.0706062	0.119055	0.0866536	0.0931149	0.10403	0.0557392	0.117491	0.0763	0.10375	0.0817918	0.0583309		0.123101	0.0707859		0.164672	0.182225	0.155653	0.133863	0.184765	0.187014	0.172415	0.187347		0.0861836	0.141986
rev2.5	40	0.0866893	0.0886771	0.120616	0.0324493	0.0978963	0.125823	0.0760664	0.134843	0.12317	0.113019	0.0850715	0.155762	0.0967812	0.114248	0.0875237	0.118824		0.198961	0.114832	0.15307	0.145265	0.151541	0.120602	0.14923	0.1974	0.190523	0.189588	0.166623		0.103591	0.161603
day 2	45	0.0674715	0.0627253	0.0675332	0.0364183	0.0417721	0.105552	0.0736961	0.121478	0.113286	0.0559861	0.06808	0.0964387	0.0870183	0.0433652	0.0414814	0.0762408		0.0640179	0.0817525	0.114565	0.125066	0.18108	0.124702	0.1386	0.1446	0.157221	0.187761	0.172823		0.072409	0.135654
	50	0.0735787	0.0602517	0.104629	0.0125819	0.0432338	0.10254	0.0725323	0.0934891	0.0981284	0.0726998	0.0529367	0.0784229	0.0942023	0.0355063	0.00325865	0.0489166		0.151846	0.110603	0.139231	0.135483	0.225905	0.0882042	0.159831	0.164002	0.129876	0.174974	0.204552		0.0654317	0.153137
	55	0.0749301	0.0448259	0.0441285	0.00843731	0.0484833	0.109677	0.0710796	0.0877521	0.0848988	0.0217158	0.0320881	0.0708305	0.0700189	0.0599403	0.0522825	0.0611182		0.120732	0.110278	0.135362	0.150306	0.245203	0.170649	0.142881	0.161188	0.136035	0.183321	0.16001		0.058888	0.155997
	60	0.0701174	0.0452775	0.0435555	0.0238643	0.0272447	0.0662828	0.0453907	0.0560083	0.0597456	0.0596859	-0.00681804	0.0568504	0.0329992	0.0604058	0.0292032	0.0488529		0.108764	0.0859611	0.173335	0.137099	0.179463	0.119384	0.156551	0.165554	0.167215	0.183703	0.182685		0.0449166	0.150883
	65	0.0318598	0.0381564	0.0472536	-0.0158226	0.0366574	0.0727285	0.0733987	0.0660112	0.0600246	0.11253	0.03702	0.0648683	0.0270007	0.0499348	0.00368551	0.00280653		0.107275	0.105361	0.178021	0.177892	0.168143	0.159732	0.146836	0.166127	0.14603	0.151343	0.165084		0.0442571	0.151986
	70	0.0430919	0.024411	0.00499749	0.000980988	0.0111981	0.088628	0.0626931	0.0394884	0.104789	0.0630841	0.00216932		0.000360867	0.0352965	0.0181769	0.0219067			0.118487	0.156845	0.164506	0.190828	0.112171	0.161811	0.149826	0.168137	0.126486	0.165272		0.0325795	0.13767
rev5	80	0.0670895	0.0682923	0.0606614	0.0534808	0.0855967	0.0752716	0.0324629	0.0813799	0.0508643	0.0586166	0.0160589	0.0721946	0.0785735	0.0433128	0.0714877	0.067903		0.169354	0.104243	0.118619	0.155572	0.21201	0.137857	0.167267	0.136096	0.153944	0.178203	0.158387		0.0614529	0.153777
day 3	85	0.0211271	0.00609698	0.0702337	0.059314	0.0182619	0.058359	0.0467588	0.0487826	0.0543872	0.0472278	0.0105398	0.0601968	0.0169798	-0.00885444	-0.00273902	0.0483801		0.141767	0.075781	0.147674	0.159603	0.129711	0.0797524	0.11734	0.0997233	0.139771	0.170914	0.181103		0.0346908	0.131195
	90	0.0218121	0.0245849	0.0193443	0.00248232	-0.0145478	0.0174663	0.0218932	0.0339779	0.00783572	0.0325515	0.00909337	0.0265886	0.000420599	0.0281853	-0.0219762	0.0140001		0.139539	0.0953077	0.180698	0.154356	0.136271	0.0798788	0.108904	0.128045	0.122495	0.195871	0.167052		0.013982	0.137129
	95	0.0198218	0.00813172	0.0252063	0.0119905	-0.00336662	0.03492	0.0186787	0.0630349	0.0609725	0.014686	0.0945317	0.0463155	-0.00143383	-0.0228395	-0.01083	0.00385154		0.0741728	0.0992258	0.138155	0.151115	0.15834	0.0741424	0.101039	0.188287	0.117666	0.21883	0.145994		0.0227295	0.133361
	100	0.0667595	-0.0189982	0.0161822	-0.0242131	0.00873084	-0.0122631	0.049375	0.0341011	0.0165725	0.025497	0.0642323	0.0335872	0.0063365	0.0250662	-0.00437059	0.0218454		0.0801043	0.0655608	0.120136	0.18466	0.142302	0.138035	0.147868	0.134121	0.131699	0.180635	0.110053		0.0192776	0.13047
	105	0.0164764	0.00226534	-0.0221289	-0.0228548	0.00761922	-0.00117598	0.0259969	0.0353132	0.00612184	0.030954	0.0121571	0.0140006	-0.0135477	0.0287864	-0.0120873	-0.0168531		0.172804	0.0753249	0.140553	0.152337	0.171011	0.111625	0.12349	0.242478	0.142507	0.174063	0.107811		0.0056902	0.146727
	110	0.0410587	-0.0265463	-0.028724	-0.0195736	-0.0231512	-0.02719	0.0134796	0.056498	-0.000311481	0.0129294	0.00913991	-0.000981917	-0.0200932	0.0121361	0.00952129	0.0430694		0.1479	0.0803562	0.160341	0.134423	0.178153	0.15105	0.155345	0.154557	0.134672	0.111046	0.10676		0.00320378	0.137691
rev5-2	120	0.0627379	0.0277524	0.0389803	0.0178646	0.00525952	0.0292199	0.0512349	0.0764334	0.034247	0.044296	0.0403576	0.0518132	0.0153132	0.046187	-0.00868995	0.0406517		0.0318629	0.127269	0.209699	0.193013	0.202521	0.110403	0.168764	0.191836	0.159486	0.157616	0.162471		0.0358537	0.155904
day 4	125	0.0633593	0.0127267	0.0158725	-0.0135665	0.00189294	-0.000584472	0.0273825	0.0537245	0.0152987	0.0111939	-0.0343959	0.0131774	0.00704105	0.0416813	-0.0651261	0.0284855		0.154191	0.116921	0.15088	0.103282	0.17317	0.0568334	0.110504	0.102326	0.0922511	0.132861	0.156397		0.0111352	0.122692
	130	0.0518175	0.0498179	0.0340845	0.0107049	-0.0322632	-0.00245658	0.0165255	0.0713067	-0.00457955	0.0518092	0.018151	0.016052	-0.0010118	0.0171955	-0.0260989	0.0286567		0.151368	0.0835745	0.150993	0.165615	0.222058	0.0811867	0.166782	0.0887527	0.119482	0.187551	0.187212		0.018732	0.14587
	135	0.0159742	0.00121159	0.0499778	-0.000517174	-0.030187	-0.00547578	0.0348409	0.00414188	-0.00281717	0.0824673	0.0426221	-0.0244569	-0.00244374	0.0239195	-0.010224	0.0346769		0.150719	0.221202	0.178682	0.128407	0.224035	0.112616	0.142496	0.122477	0.164647	0.175463	0.129545		0.0133569	0.159117
	140	0.0366647	-0.00660749	0.00539932	-0.00593555	-0.0223345	-0.00871366	0.0426706	0.0636281	0.0652318	0.0590367	-0.00864943	-0.0191645	-0.042771	0.0222601	0.00366297	0.0616147		0.123886	0.141857	0.151245	0.147054	0.190703	0.0507756	0.136989	0.15047	0.160371	0.183275	0.0463918		0.0153746	0.13482
	145	0.0131971	-0.0422618	0.00316647	0.0217863	-0.00494138	-0.0506775	0.00784496	0.0648631	0.0537204	-0.0167502	-0.0213254	-0.0321363	-0.0258984	0.00798754	-0.0664238	0.03878		0.179577	0.105386	0.129827	0.240045	0.243027	0.0351582	0.198319	0.188193	0.212967	0.13532	0.0617131		-0.00306681	0.15723
	150	0.0231489	0.00601836	-0.0113327	-0.0126996	0.00911609	-0.0201926	0.0148954	0.0026915	0.00626554	0.0125768	-0.0269564	-0.0386936	0.0226678	0.0371113	0.0129433	0.0221168		0.098057	0.081097	0.137359	0.123538	0.198589	0.0165627	0.152293	0.0735038	0.163362	0.0936911	0.0682167		0.00372981	0.109661
rev5-3	160		0.0328853	0.0160453		0.0217256	0.0155004	0.0239427	0.0393973	0.0164808	0.0281345	0.0104844	0.0434265	0.0152208	-0.0139528	-0.0375221	0.0424195		0.172763	0.0867266	0.159083	0.179786	0.165568	0.144441	0.204305	0.215862	0.191354	0.195379	0.178322		0.0181563	0.172145
day 5	165		-0.0311813	0.0245992		0.0302094	0.00649176	0.00752909	0.0573545	0.0127053	0.00179708	0.0107067	-0.0055775	-0.00683491	-0.00323824	-0.00983142	0.0327252		0.124738	0.0628575	0.141427	0.0899815	0.150674	0.0261987	0.156997	0.0838808	0.112306	0.21391	0.0629678		0.00910393	0.111449
	170		-0.0417291	-0.0128751		-0.00862898	-0.00704797	0.00451285	0.0328051	0.00979705	0.0188324	0.00291796	0.0271203	0.0151343	0.00729421	0.0158176	0.0583807		0.120302	0.0470761	0.158061	0.0817297	0.156294	0.0582424	0.162203	0.130391	0.119056	0.226097	0.0396226		0.00873796	0.118098
	175		-0.0367843	-0.0193684		-0.00385529	0.000964189	-0.00991218	0.0251398	0.000540652	0.0343521	-0.0356204	-0.0260987	0.0436055	0.0328767	0.0151912	0.0367007		0.129329	0.0678266	0.174459	0.0663594	0.095894	0.00129162	0.151703	0.0832567	0.116507	0.237052	0.101206		0.00412368	0.111353
	180		-0.00671806	0.0111419		0.00605231	0.00512906	0.0229087	0.0278779	-0.000349625	0.0146171	-0.0156238	0.0391843	-0.0250786	0.0177288	-0.012702	0.0742182		0.123376	0.0309335	0.141085	0.073821	0.176475	0.0489891	0.187287	0.099243	0.136586	0.213919	0.0519454		0.0113133	0.116696
	185		-0.0354841	-0.0118174		0.0477237	-0.0362592	-0.0327148	0.0350283	0.0249038	0.0346356	-0.00996258	0.00579412	-0.0328138	-0.031872	0.0327263	0.0595584		0.0851362	0.0404937	0.116622	0.0509005	0.143351	0.0135523	0.167764	0.0905185	0.145357	0.228885	0.0237984		0.00353189	0.10058
	190		0.0265024	0.00713778		0.0209215	0.00121059	0.0131858	0.0551054	0.0126329	0.0223273	-0.0134519	0.0117429	0.00490291	0.00997222	-0.0050024	0.055925		0.0720282	0.0645068	0.153116	0.0777058	0.178473	0.0511299	0.125126	0.109308	0.132235	0.20478	0.0180241		0.0159366	0.107858

## Sheet: VOR Reversal during training
Gain																															young	old	young	old
		ypr1	ypr2	ypr3	ypr4	ypr5	ypr6	ypr7	ypr8	ypr9	ypr10	ypr11	ypr12	ypr13	ypr14	ypr15	ypr16		apr1	apr2	apr3	apr4	apr5	apr6	apr7	apr8	apr9	apr10	apr11		av	av	sem	sem
decr	2.5	0.135783	0.124089	0.121884	0.124201	0.198083	0.177803	0.235136	0.165814	0.193321	0.213169	0.230412	0.181156	0.11959	0.330383	0.208516	0.177316		0.273244	0.20258	0.327655	0.224716	0.224697	0.217226	0.182911	0.226499	0.21528	0.202434	0.191837		0.183541	0.22628	0.0138217	0.0123906
day 1	7.5	0.0717162	0.0755904	0.0745992		0.143242	0.178339	0.181474	0.146745	0.125068	0.131417	0.139304	0.117611	0.0928242	0.14887	0.133301	0.117358		0.181358	0.144083	0.21531	0.276348	0.207117	0.148692	0.149566	0.18501	0.185143	0.153318	0.171656		0.125164	0.183418	0.00891577	0.0117427
	12.5	0.036558	0.0486262	0.0659907	0.0873562	0.11617	0.13263	0.154065	0.0944239	0.13079	0.105091	0.0969755	0.118783	0.0759316	0.0671617	0.0908214	0.0882071		0.138351	0.120031	0.193233	0.171982	0.200805	0.12572	0.155796	0.144198	0.159064	0.152692	0.143707		0.0943488	0.155053	0.00789692	0.00767069
	17.5	0.0584331	0.0383165	0.0589635	0.0630761	0.123039	0.127716	0.128342	0.0806435	0.108513	0.0849157	0.0838823	0.116144	0.0636844	0.0695654	0.0452172	0.0935252		0.123976	0.103509	0.199374	0.208648	0.213832	0.120929	0.121653	0.157285	0.149033	0.132141	0.122013		0.0839986	0.150217	0.00737926	0.0119068
	22.5	0.0737393	0.0372284	0.0444424	0.0552396	0.0474631	0.0824607	0.108535	0.0958811	0.0983044	0.0968041	0.0583527	0.0688181	0.0589922	0.0930609	0.0580636	0.0578088		0.111244	0.0966438		0.166968	0.15074	0.105435	0.0958675	0.127231	0.135849	0.108244	0.248261		0.0709496	0.134648	0.00553898	0.0146494
	27.5	0.0634126	0.0382145	0.0428857	0.0575913	0.103692	0.0702656	0.125098	0.078477	0.087549	0.0937588	0.0615396	0.0657827	0.0611483	0.100894	0.0737197	0.0605406		0.133583	0.103917		0.119233	0.200071	0.0961894	0.0813332	0.127597	0.13719	0.102171	0.126546		0.0740355	0.122783	0.0057818	0.010303
rev2.5	42.5	0.596376	0.559797	0.503515	0.674085	0.592167	0.574461	0.623828	0.603774	0.586225	0.477603	0.538263	0.241364	0.589983	0.383887	0.649729	0.532666		0.380636	0.292126	0.354706	0.55008	0.290624	0.485796	0.562962	0.392242	0.349703	0.474862	0.396581		0.545483	0.411847	0.0267381	0.0284653
day 2	47.5	0.909525	0.752377	0.778501	1.15212	0.962884	0.784755	0.771833	0.8401	0.766298	0.670231	0.936631	0.587847	0.858155	0.659828	0.788118	0.894704		0.78371	0.529314	0.54061	0.850299	0.38112	0.73593	0.610218	0.591402	0.470973	0.66157	0.435442		0.819619	0.599144	0.0338819	0.0446192
	52.5	0.814104	0.842107	0.784877	1.14107	1.04417	0.920952	0.837172	0.901277	0.771041	0.7868	1.02779	0.674473	0.985758	0.690853	0.501558	0.912002		0.825868	0.636262	0.631519	0.937434	0.460101	0.872069	0.649926	0.769817	0.656691	0.76125	0		0.85225	0.65463	0.0396561	0.0767816
	57.5	0.55882	0.861325	0.907041	0.966247	1.05128	1.0225	0.814544	1.01029	0.679773	0.887622	1.06407	0.614436	0.9869	0.911824	0.73037	1.0441		0.822303	0.604556	0.685554	0.927068	0	0.911542	1.03641	0.724196	0.634019	0.856525	0.639123		0.881946	0.712845	0.0402508	0.082852
	62.5	0.905271	0.59797	0.945333	1.23639	0.944112	1.00367	1.04123	0.985398	0.853614	0.844331	0.990079	0.26024	1.04665	0.908914	0.728119	0.910082		0.863157	0.744901	0.461626	0.720748	0.460612	0.898702	1.14768	0.721858	0.664474	1.06334	0.641893		0.887587	0.762636	0.054689	0.0658562
	67.5	0.898289	0.714013	1.05269	1.13432	1.08994	1.06074	0.804177	0.929694	0.740544	0.707483	0.487462	0.471719	0.877289	0.87699	0.70676	1.01535		0.837506	0.740579	0.900776	1.27537	0.524693	0.898013	0.662419	0.838594	0.696271	0.756848	0.801483		0.847967	0.81205	0.0503848	0.0570419
rev5	82.5	0.771582	0.5646	0.610824	0.58605	0.588526	0.602334	0.753022	0.758192	0.6447	0.479027	0.684262	0.619203	0.644791	0.62084	0.67166	0.67212		0.663832	0.479722	0.420735	0.713402	0.473151	0.656515	0.353289	0.486576	0.294908	0.577513	0.494055		0.641983	0.510336	0.0191768	0.0396495
day 3	87.5	0.764193	0.676675	0.687133	0.641096	0.644975	0.716803	0.682196	0.747455	0.635703	0.513422	0.641915	0.619831	0.683607	0.640862	0.705581	0.712863		0.733231	0.538727	0.483923	0.775097	0.467592	0.662875	0.459731	0.57044	0.369897	0.603709	0.543578		0.669644	0.564436	0.01474	0.0369156
	92.5	0.812789	0.713284	0.726568	0.663164	0.60328	0.73546	0.737019	0.763634	0.720768	0.56126	0.840551	0.659587	0.694497	0.819449	0.781374	0.744211		0.666959	0.614695	0.554298	0.80561	0.568259	0.743098	0.569525	0.594929	0.447677	0.598334			0.723556	0.616338	0.018936	0.0319789
	97.5	0.778485	0.684601	0.701283	0.688818	0.740079	0.629258	0.831614	0.826208	0.726695	0.605803	0.740513	0.705499	0.710517	0.722046	0.756263	0.811377		0.739024	0.575925		0.775647	0.522632	0.694188	0.49104	0.691328	0.460373	0.724656			0.728691	0.630535	0.0158953	0.0395237
	102.5	0.642644	0.802433	0.73368	0.711474	0.70292	0.735199	0.794646	0.846486	0.800979	0.619456	0.64853	0.726021	0.735576	0.811578	0.796355	0.783726			0.648765	0.389697	0.739612	0.627993	0.515086	0.560925	0.691646	0.505136	0.679226	0.531047		0.743231	0.588913	0.0166869	0.0337997
	107.5	0.724442	0.603683	0.520638	0.729464	0.715284	0.821311	0.852908	0.840794	0.670925	0.615201	0.701059	0.697713	0.728585	0.606255	0.723316	0.840998		0.501644	0.676627		0.659245	0.61796	0.50363	0.654976	0.677411	0.544562	0.705313	0.658273		0.712036	0.619964	0.0238766	0.023864
rev5-2	122.5	0.714484	0.68168	0.682253	0.767184	0.795059	0.809223	0.714714	0.81512	0.920665	0.704705	0.702568	0.563885	0.715569	0.779148	0.722149	0.673133		0.744034	0.694127	0.684757	0.789181	0.593117	0.778906	0.519157	0.77249	0.488497	0.769142	0.627639		0.735096	0.678277	0.0199028	0.0323795
day 4	127.5	0.752932	0.730365	0.718117	0.776534	0.822471	0.833868	0.656256	0.782323	0.936661	0.751251	0.677513	0.7373	0.727345	0.836909	0.883769	0.677848		0.855902	0.690864	0.660719	0.868999	0.738158	0.904826	0.61843	0.815057	0.507735	0.716715	0.612136		0.768841	0.726322	0.0193627	0.0375545
	132.5	0.750475	0.747847	0.713981	0.756666	0.889003	0.898214	0.686429	0.798513	0.844754	0.780699	0.716715	0.760449	0.737932	0.887369	0.803623	0.690331		0.766446	0.754195	0.707662	0.689748	0.736065	0.902695	0.590976	1.00419	0.548104	0.876843	0.538112		0.778938	0.737731	0.0173472	0.0446416
	137.5	0.768365	0.807011	0.730487	0.799939	0.806923	0.738734	0.716074	0.811838	0.853172	0.838522	0.698307	0.738741	0.776572	0.858257	0.804588	0.679681		0.791256	0.775375	0.67564	1.01832	0.534362	0.880277	0.697564	0.860176	0.553092	0.74933	0.8239		0.776701	0.759935	0.0136972	0.0427868
	142.5	0.786932	0.772263	0.73693	0.789378	1.01198	0.981626	0.721427	0.811774	0.833277	0.846824	0.714002	0.767744	0.797778	0.983371	0.870032	0.701612		0.689836	0.423999	0.721861	0.98887	0.875193	0.960591	0.676066	0.840811	0.582627	0.804087	0.718258		0.820434	0.752927	0.02437	0.0498483
	147.5	0.778698	0.800135	0.775269	0.792879	1.02337	0.870434	0.728162	0.788611	0.861713	0.864686	0.66802	0.700652	0.731963	0.948238	0.812308	0.693872		0.778691	0.868124	0.732913	0.931101	0.834323	0.940112	0.755381	0.803072	0.573723	0.755483	0.776723		0.802438	0.795422	0.0236701	0.030613
rev5-3	162.5		0.704428	0.720821		0.719691	0.832606	0.716999	0.7691	0.858609	0.869033	0.807801	0.723029	0.793491	0.727268	0.792482	0.840698		0.734465	0.757287	0.862454	0.78617	0.816186	0.900652	0.60946	0.761191	0.538182	0.944206	1.03184		0.776861	0.794736	0.0156359	0.0427683
day 5	167.5		0.759081	0.756013		0.83397	0.756425	0.788242	0.770803	0.848483	0.853033	0.808059	0.837495	0.771769	0.861442	0.880674	0.849922		0.812592	0.775743	0.887131	0.72639	0.71557	0.925833	0.951003	0.822209	0.568749	0.878904	1.01463		0.812529	0.825342	0.0118742	0.0379858
	172.5		0.727786	0.773488		0.763825	0.858942	0.789406	0.822624	0.825524	0.861619	0.891699	0.829024	0.811669	0.866549	0.854031	0.875322		0.835309	0.790582	0.876985		0.80543	0.881108	1.08123	0.734774	0.617026	0.851959	0.566154		0.825108	0.804056	0.0127004	0.045694
	177.5		0.696556	0.780868		0.773114	0.952181	0.795749	0.829648	0.85689	0.898201	0.913337	0.86467	0.835287	0.840466	0.843565	0.874115		0.780368	0.811245		0.627328	0.677022	0.796047	0.573674	0.784979	0.630606	0.947114	0.779864		0.839618	0.740825	0.0172335	0.0353774
	182.5		0.693569	0.783631		0.789931	0.953746	0.829104	0.828747	0.851379	0.899172	0.897222	0.829217	0.822476	0.845919	0.809909	0.887855		0.766758	0.836237	0.881781	0.785716	0.930588	0.890497	0.571269	0.819801	0.638215	0.866002	0.703093		0.837277	0.789996	0.0167012	0.0338559
	187.5		0.746208	0.785125		0.748136	0.937356	0.819322	0.852254	0.849623	0.849676	0.913377	0.862684	0.773134	0.887231	0.9022	0.932005		0.757232	0.681058	0.874926	0.784345	0.92273	0.731624	0.820079	0.848258	0.716296	0.846438	0.766889		0.847024	0.795443	0.0173416	0.0222253
Phase
		ypr1	ypr2	ypr3	ypr4	ypr5	ypr6	ypr7	ypr8	ypr9	ypr10	ypr11	ypr12	ypr13	ypr14	ypr15	ypr16		apr1	apr2	apr3	apr4	apr5	apr6	apr7	apr8	apr9	apr10	apr11
decr	2.5	57.231	62.5249	54.6575	57.1973	49.0074	52.9289	42.2059	51.8376	44.672	52.2449	45.8461	45.1039	51.4372	39.9941	45.5431	45.5032		36.3365	39.6305	35.3065	32.6358	39.7117	41.0465	42.5103	41.251	46.9	46.6479	47.6566		49.8709	40.8758	1.54515	1.47973
day 1	7.5	54.2232	63.9244	47.149		49.9513	43.4349	45.6492	50.7673	49.6405	53.3583	48.8756	42.987	54.4854	7.15314	44.0413	44.0415		48.0089	36.7811	55.5903	42.143	40.5327	44.4273	44.9677	46.2296	44.3678	47.2361	49.6457		46.6455	45.4482	3.16417	1.48781
	12.5	41.2235	64.5353	48.1169	52.3703	47.3129	52.8339	41.7122	46.3271	44.5944	52.0406	57.2302	52.1768	38.4216	18.1535	52.0671	41.3003		42.3525	41.8908	58.4187	40.3401	37.2575	47.6956	56.2179	45.4318	46.1909	45.6572	52.2949		46.901	46.7043	2.54939	1.98816
	17.5	67.6548	36.8598	49.0548	52.2378	34.1449	45.8356	40.936	49.0683	61.0782	45.9832	46.0852	40.3018	56.5265	10.5654	59.9592	40.0941		55.736	44.623	57.3114	28.3799	30.4491	46.3822	62.2043	45.1618	47.9327	51.7432	54.6556		46.0241	47.689	3.3118	3.19178
	22.5	20.6708	32.741	35.6281	42.6817	69.2657	46.1961	39.5759	41.976	46.4298	43.3643	56.4703	48.255	37.7803	30.1161	49.9008	37.7988		59.7877	40.5314		46.0461	45.2578	43.0894	48.2086	50.0494	44.8137	55.8225	31.0639		42.4282	46.467	2.77999	2.51462
	27.5	46.2303	39.6452	50.7412	53.4946	51.4425	40.4736	31.4937	51.1225	44.6233	51.9411	42.0396	52.9102	24.293	41.7476	37.5712	32.8206		46.8252	43.8059		44.0484	41.5342	47.7715	48.0775	49.5874	46.6117	54.6602	53.5587		43.2869	47.6481	2.17255	1.31198
rev2.5	42.5	162.555	163.684	158.602	172.718	166.968	161.958	160.922	166.734	161.115	159.434	162.767	153.221	160.841	157.352	163.862	169.345		143.165	134.139	121.943	146.467	124.24	148.276	132.927	138.974	119.88	138.227	160.626		162.63	137.169	1.18473	3.72392
day 2	47.5	167.875	172.754	171.155	170.085	172.215	166.281	170.719	170.715	168.61	171.336	172.734	173.256	174.54	173.902	181.803	173.08		147.972	152.948	140.102	152.948	143.175	158.498	174.22	153.935	139.793	147.893	197.612		171.941	155.372	0.864438	5.13312
	52.5	172.827	175.25	170.355	179.683	176.179	167.015	171.246	175.447	168.003	175.377	174.416	192.829	176.227	177.869	180.745	176.311		156.567	159.674	146.699	145.822	152.706	162.089	174.702	162.426	153.684	158.261			175.611	157.263	1.49099	2.6613
	57.5	159.081	176.595	173.146	172.928	175.49	172.682	179.51	176.999	179.449	177.106	174.719	190.957	179.29	183.915	190.73	179.245		156.015	159.056	149.754	154.708	180	166.288	162.453	165.552	153.612	159.315	151.418		177.615	159.834	1.85574	2.59506
	62.5	178.671	203.22	177.712	183.373	171.74	173.981	179.68	176.312	175.302	178.561	180.618	199.969	182.114	174.367	174.382	179.505		155.26	164.571	148.982	123.534	157.372	166.169	177.123	164.423	159.422	163.066	180.992		180.594	160.083	2.19977	4.5752
	67.5	173.11	157.286	178.204	179.107	175.883	175.578	177.636	177.559	178.511	178.061	230.701	188.518	183.636	179.775	168.248	176.501		161.98	163.521	161.34	156.191	160.557	165.871	171.712	163.547	160.699	139.44	161.469		179.895	160.575	3.77936	2.40992
rev5	82.5	175.128	185.416	177.491	172.434	173.166	174.254	178.282	178.656	179.699	178.695	177.285	175.313	176.668	181.299	180.235	177.384		169.83	172.429	162.132	164.076	160.054	166.967	165.57	170.824	160.885	169.414	175.241		177.588	167.038	0.813463	1.49475
day 3	87.5	178.367	179.957	177.398	178.604	180.146	177.262	178.829	180.694	182.861	180.668	183.608	180.788	178.332	189.616	179.166	180.331		168.938	174.217	166.937	168.757	168.949	172.045	168.89	173.82	169.181	170.882	171.966		180.414	170.417	0.753706	0.702894
	92.5	176.301	178.958	178.218	179.375	182.138	177.172	179.698	181.37	183.588	180.103	180.017	181.188	180.03	186.809	180.98	179.265		168.908	174.621	168.331	171.605	171.09	174.715	169.95	174.326	171.977	172.676			180.326	171.82	0.623601	0.730236
	97.5	186.073	180.59	177.947	179.873	183.133	192.827	180.142	182.284	180.503	180.068	180.904	185.753	179.709	178.479	180.954	180.987		171.871	182.254		169.756	173.819	184.031	172.031	178.055	174.499	175.511			181.889	175.758	0.91833	1.60883
	102.5	176.934	181.625	179.383	179.996	179.346	177.425	179.349	181.377	182.894	180.782	170.277	175.363	180.903	181.047	182.952	179.838			173.246	160.816	172.904	170.795	204.351	172.358	175.469	172.662	174	178.837		179.343	175.544	0.792052	3.51704
	107.5	181.929	186.586	204.719	180.394	187.752	183.053	180.6	183.286	178.089	181.268	176.953	175.76	180.96	172.005	182.897	181.355		172.027	173.752		172.068	175.547	173.203	178.02	173.823	175.076	175.764	171.238		182.35	174.052	1.77726	0.656419
rev5-2	122.5	175.787	177.606	175.013	175.373	188.953	179.949	178.385	179.713	178.227	179.047	180.827	172.264	179.834	173.089	177.059	181.39		171.07	173.428	168.735	171.373	170.219	173.934	172.838	173.733	168.05	172.714	171.836		178.282	171.63	0.975446	0.597028
day 4	127.5	178.82	179.078	180.125	179.348	178.611	181.734	180.639	180.371	181.752	185.436	181.494	180.642	179.723	179.319	178.012	181.829		175.524	174.5	172.252	172.086	172.226	175.699	174.77	176.883	169.169	174.836	173.056		180.433	173.727	0.448442	0.662889
	132.5	179.406	180.016	179.371	179.874	184.717	180.013	182.101	181.537	180.457	182.715	180.764	174.897	181.033	181.428	184.922	180.98		176.335	175.638	172.761	159.325	174.268	175.414	173.789	176.767	170.984	173.458	169.209		180.889	172.541	0.575997	1.48851
	137.5	179.104	181.22	178.58	180.463	180.888	190.016	182.877	182.809	182.223	183.131	181.248	179.655	181.952	184.157	181.008	182.321		175.384	177.475	173.434	175.982	177.569	177.637	177.303	175.648	172.545	173.95	175.823		181.978	175.704	0.655444	0.533523
	142.5	179.355	179.133	180.26	182.626	181.898	185.154	182.663	180.424	180.714	182.42	181.797	181.966	181.57	181.189	184.685	181.523		171.642	166.667	175.893	175.968	173.005	177.866	177.996	176.021	173.416	176.412	166.342		181.711	173.748	0.409958	1.23175
	147.5	180.549	181.432	181.629	179.87	171.813	179.942	183.043	181.309	182.824	180.775	186.693	181.314	178.069	182.11	182.256	181.837		178.656	174.836	176.261	176.408	175.647	175.568	176.472	176.771	174.768	176.627	179.273		180.966	176.481	0.763277	0.424848
rev5-3	162.5		187.871	177.109		180.044	178.757	178.491	179.579	180.865	180.593	179.597	179.842	179.857	186.647	180.185	180.132		174.161	175.577	171.601	173.614	173.778	174.592	174.331	175.092	170.299	175.565	173.319		180.684	173.812	0.78907	0.489364
day 5	167.5		181.217	179.414		185.359	171.809	181.764	183.517	182.103	181.918	178.917	183.079	180.259	180.724	182.039	180.778		174.738	176.25	174.945	175.908	175.14	177.39	170.433	175.677	172.607	173.691	171.966		180.921	174.431	0.829889	0.622279
	172.5		181.431	179.262		180.818	178.576	183.855	181.232	180.427	181.799	181.614	182.765	180.594	178.827	182.12	179.892		178.453	179.1	174.959		176.357	177.887	177.174	178.714	171.703	174.173	167.213		180.944	175.573	0.399891	1.18481
	177.5		182.547	181.075		182.303	180.815	183.398	183.243	181.911	182.013	184.364	179.997	178.646	180.364	184.093	181.608		176.373	179.339		167.297	168.066	181.198	174.455	177.252	173.532	177.768	178.908		181.884	175.419	0.432423	1.47287
	182.5		177.038	181.127		182.26	181.888	182.96	181.201	181.329	181.615	182.434	178.271	181.538	180.237	188.368	180.584		177.304	179.519	174.653	176.1	175.596	175.718	176.404	177.41	174.94	176.254	176.488		181.489	176.399	0.679132	0.404351
	187.5		176.451	180.631		182.901	182.3	181.787	182.96	180.593	181.146	178.652	182.121	174.824	180.901	180.785	182.575		177.386	191.449	174.389	177.623	177.562	180.352	183.057	177.07	175.432	176.307	178.204		180.616	178.985	0.646922	1.43154
